# Supplementary material for: Somatosensory cortex participates in the consolidation of human motor memory
Source: PLoS Biol. 2019 Oct 15;17(10):e3000469. doi: 10.1371/journal.pbio.3000469 (PMC6793938; doi:10.1371/journal.pbio.3000469)
Supplement: S4 Data — (XLSX) [file pbio.3000469.s004.xlsx]

## Sheet: Fig_4A
trialnum	subjnum	groupName	sessionName	pd
6	5	somatosensory-abrupt	relearning	6.997
7	5	somatosensory-abrupt	relearning	1.193
8	5	somatosensory-abrupt	relearning	-1.032
9	5	somatosensory-abrupt	relearning	-12.721
11	5	somatosensory-abrupt	relearning	-3.423
12	5	somatosensory-abrupt	relearning	-15.056
13	5	somatosensory-abrupt	relearning	5.027
14	5	somatosensory-abrupt	relearning	6.536
15	5	somatosensory-abrupt	relearning	8.508
16	5	somatosensory-abrupt	relearning	-8.213
17	5	somatosensory-abrupt	relearning	-19.86
18	5	somatosensory-abrupt	relearning	-1.024
19	5	somatosensory-abrupt	relearning	4.318
20	5	somatosensory-abrupt	relearning	-5.758
21	5	somatosensory-abrupt	relearning	-12.501
22	5	somatosensory-abrupt	relearning	3.023
23	5	somatosensory-abrupt	relearning	-9.716
24	5	somatosensory-abrupt	relearning	-6.32
25	5	somatosensory-abrupt	relearning	-13.081
26	5	somatosensory-abrupt	relearning	1.134
27	5	somatosensory-abrupt	relearning	-2.871
28	5	somatosensory-abrupt	relearning	-11.222
29	5	somatosensory-abrupt	relearning	-13.364
30	5	somatosensory-abrupt	relearning	-2.008
31	5	somatosensory-abrupt	relearning	0.216
32	5	somatosensory-abrupt	relearning	-8.005
33	5	somatosensory-abrupt	relearning	-0.045
34	5	somatosensory-abrupt	relearning	-3.611
35	5	somatosensory-abrupt	relearning	3.117
36	5	somatosensory-abrupt	relearning	-12.359
37	5	somatosensory-abrupt	relearning	-3.349
38	5	somatosensory-abrupt	relearning	-5.105
39	5	somatosensory-abrupt	relearning	2.296
40	5	somatosensory-abrupt	relearning	-1.057
41	5	somatosensory-abrupt	relearning	-2.108
42	5	somatosensory-abrupt	relearning	0.303
43	5	somatosensory-abrupt	relearning	3.161
44	5	somatosensory-abrupt	relearning	8.412
45	5	somatosensory-abrupt	relearning	-10.005
46	5	somatosensory-abrupt	relearning	3.823
47	5	somatosensory-abrupt	relearning	-8.435
48	5	somatosensory-abrupt	relearning	-0.711
49	5	somatosensory-abrupt	relearning	0.857
50	5	somatosensory-abrupt	relearning	5.039
51	5	somatosensory-abrupt	relearning	-8.53
52	5	somatosensory-abrupt	relearning	13.42
53	5	somatosensory-abrupt	relearning	15.018
54	5	somatosensory-abrupt	relearning	-8.218
56	5	somatosensory-abrupt	relearning	-7.025
57	5	somatosensory-abrupt	relearning	1.534
58	5	somatosensory-abrupt	relearning	-0.666
59	5	somatosensory-abrupt	relearning	-8.51
60	5	somatosensory-abrupt	relearning	-5.631
61	5	somatosensory-abrupt	relearning	-0.788
62	5	somatosensory-abrupt	relearning	-1.701
63	5	somatosensory-abrupt	relearning	-0.267
64	5	somatosensory-abrupt	relearning	-0.592
65	5	somatosensory-abrupt	relearning	3.739
66	5	somatosensory-abrupt	relearning	1.046
67	5	somatosensory-abrupt	relearning	-2.215
68	5	somatosensory-abrupt	relearning	-3.9
69	5	somatosensory-abrupt	relearning	-0.363
70	5	somatosensory-abrupt	relearning	-7.016
71	5	somatosensory-abrupt	relearning	2.736
72	5	somatosensory-abrupt	relearning	-10.864
73	5	somatosensory-abrupt	relearning	7.136
74	5	somatosensory-abrupt	relearning	-8.092
75	5	somatosensory-abrupt	relearning	-0.737
76	5	somatosensory-abrupt	relearning	0.635
77	5	somatosensory-abrupt	relearning	-2.276
78	5	somatosensory-abrupt	relearning	-3.589
79	5	somatosensory-abrupt	relearning	4.605
80	5	somatosensory-abrupt	relearning	-3.547
81	5	somatosensory-abrupt	relearning	-6.076
82	5	somatosensory-abrupt	relearning	3.986
83	5	somatosensory-abrupt	relearning	9.087
84	5	somatosensory-abrupt	relearning	-10.954
86	5	somatosensory-abrupt	relearning	-4.684
87	5	somatosensory-abrupt	relearning	-15.445
88	5	somatosensory-abrupt	relearning	-3.553
89	5	somatosensory-abrupt	relearning	-6.754
90	5	somatosensory-abrupt	relearning	-3.662
91	5	somatosensory-abrupt	relearning	-0.96
92	5	somatosensory-abrupt	relearning	-5.393
93	5	somatosensory-abrupt	relearning	-14.787
94	5	somatosensory-abrupt	relearning	-4.002
95	5	somatosensory-abrupt	relearning	0.202
96	5	somatosensory-abrupt	relearning	-0.331
97	5	somatosensory-abrupt	relearning	-5.95
98	5	somatosensory-abrupt	relearning	-6.848
99	5	somatosensory-abrupt	relearning	4.835
100	5	somatosensory-abrupt	relearning	-3.867
101	5	somatosensory-abrupt	relearning	-2.499
102	5	somatosensory-abrupt	relearning	-10.098
103	5	somatosensory-abrupt	relearning	-5.26
104	5	somatosensory-abrupt	relearning	-4.624
105	5	somatosensory-abrupt	relearning	-5.318
106	5	somatosensory-abrupt	relearning	-12.062
107	5	somatosensory-abrupt	relearning	-1.771
108	5	somatosensory-abrupt	relearning	-4.202
109	5	somatosensory-abrupt	relearning	4.772
110	5	somatosensory-abrupt	relearning	-3.825
111	5	somatosensory-abrupt	relearning	1.804
112	5	somatosensory-abrupt	relearning	-10.234
113	5	somatosensory-abrupt	relearning	0.904
114	5	somatosensory-abrupt	relearning	1.12
116	5	somatosensory-abrupt	relearning	-7.915
117	5	somatosensory-abrupt	relearning	-3.849
118	5	somatosensory-abrupt	relearning	-4.265
119	5	somatosensory-abrupt	relearning	2.902
120	5	somatosensory-abrupt	relearning	5.716
121	5	somatosensory-abrupt	relearning	-3.223
122	5	somatosensory-abrupt	relearning	-4.508
123	5	somatosensory-abrupt	relearning	-0.732
124	5	somatosensory-abrupt	relearning	-8.722
125	5	somatosensory-abrupt	relearning	0.422
126	5	somatosensory-abrupt	relearning	-9.689
127	5	somatosensory-abrupt	relearning	1.119
128	5	somatosensory-abrupt	relearning	-4.953
129	5	somatosensory-abrupt	relearning	4.71
130	5	somatosensory-abrupt	relearning	-4.673
131	5	somatosensory-abrupt	relearning	-5.451
132	5	somatosensory-abrupt	relearning	-11.15
133	5	somatosensory-abrupt	relearning	-2.637
134	5	somatosensory-abrupt	relearning	-5.805
135	5	somatosensory-abrupt	relearning	-5.072
136	5	somatosensory-abrupt	relearning	-5.867
137	5	somatosensory-abrupt	relearning	-4.47
138	5	somatosensory-abrupt	relearning	-16.004
139	5	somatosensory-abrupt	relearning	2.311
140	5	somatosensory-abrupt	relearning	-2.935
141	5	somatosensory-abrupt	relearning	0.508
142	5	somatosensory-abrupt	relearning	1.101
143	5	somatosensory-abrupt	relearning	0.737
144	5	somatosensory-abrupt	relearning	-9.922
146	5	somatosensory-abrupt	relearning	-4.351
147	5	somatosensory-abrupt	relearning	-7.246
148	5	somatosensory-abrupt	relearning	-9.351
149	5	somatosensory-abrupt	relearning	-1.494
151	5	somatosensory-abrupt	relearning	-9.601
152	5	somatosensory-abrupt	relearning	-3.765
153	5	somatosensory-abrupt	relearning	-2.679
154	5	somatosensory-abrupt	relearning	-0.485
155	5	somatosensory-abrupt	relearning	0.703
6	7	somatosensory-abrupt	relearning	15.844
7	7	somatosensory-abrupt	relearning	-11.679
8	7	somatosensory-abrupt	relearning	1.672
9	7	somatosensory-abrupt	relearning	-1.982
11	7	somatosensory-abrupt	relearning	-10.287
12	7	somatosensory-abrupt	relearning	-9.426
13	7	somatosensory-abrupt	relearning	-1.041
14	7	somatosensory-abrupt	relearning	-2.313
15	7	somatosensory-abrupt	relearning	-15.845
16	7	somatosensory-abrupt	relearning	4.941
17	7	somatosensory-abrupt	relearning	-7.157
18	7	somatosensory-abrupt	relearning	-1.699
19	7	somatosensory-abrupt	relearning	-9.228
20	7	somatosensory-abrupt	relearning	-4.979
21	7	somatosensory-abrupt	relearning	-1.24
22	7	somatosensory-abrupt	relearning	-8.052
23	7	somatosensory-abrupt	relearning	-4.631
24	7	somatosensory-abrupt	relearning	-8.337
25	7	somatosensory-abrupt	relearning	-1.817
26	7	somatosensory-abrupt	relearning	-3.721
27	7	somatosensory-abrupt	relearning	-2.873
28	7	somatosensory-abrupt	relearning	-9.421
29	7	somatosensory-abrupt	relearning	0.841
30	7	somatosensory-abrupt	relearning	6.395
31	7	somatosensory-abrupt	relearning	2.853
32	7	somatosensory-abrupt	relearning	-5.835
33	7	somatosensory-abrupt	relearning	8.781
34	7	somatosensory-abrupt	relearning	-3.889
35	7	somatosensory-abrupt	relearning	-12.498
36	7	somatosensory-abrupt	relearning	-10.228
37	7	somatosensory-abrupt	relearning	-0.139
38	7	somatosensory-abrupt	relearning	-8.19
39	7	somatosensory-abrupt	relearning	6.496
40	7	somatosensory-abrupt	relearning	-5.205
41	7	somatosensory-abrupt	relearning	-8.987
42	7	somatosensory-abrupt	relearning	0.056
43	7	somatosensory-abrupt	relearning	1.733
44	7	somatosensory-abrupt	relearning	1.046
45	7	somatosensory-abrupt	relearning	10.063
46	7	somatosensory-abrupt	relearning	-4.377
47	7	somatosensory-abrupt	relearning	-4.484
48	7	somatosensory-abrupt	relearning	-3.689
49	7	somatosensory-abrupt	relearning	1.242
50	7	somatosensory-abrupt	relearning	-0.683
51	7	somatosensory-abrupt	relearning	-6.502
52	7	somatosensory-abrupt	relearning	5.395
53	7	somatosensory-abrupt	relearning	1.989
54	7	somatosensory-abrupt	relearning	-4.943
56	7	somatosensory-abrupt	relearning	-0.05
57	7	somatosensory-abrupt	relearning	-0.926
58	7	somatosensory-abrupt	relearning	4.419
59	7	somatosensory-abrupt	relearning	-6.585
60	7	somatosensory-abrupt	relearning	-2.762
61	7	somatosensory-abrupt	relearning	-3.213
62	7	somatosensory-abrupt	relearning	1.225
63	7	somatosensory-abrupt	relearning	1.618
64	7	somatosensory-abrupt	relearning	1.093
65	7	somatosensory-abrupt	relearning	-4.137
66	7	somatosensory-abrupt	relearning	-7.743
67	7	somatosensory-abrupt	relearning	0.807
68	7	somatosensory-abrupt	relearning	-8.219
69	7	somatosensory-abrupt	relearning	-3.699
70	7	somatosensory-abrupt	relearning	-8.753
71	7	somatosensory-abrupt	relearning	-4.645
72	7	somatosensory-abrupt	relearning	4.997
73	7	somatosensory-abrupt	relearning	-0.642
74	7	somatosensory-abrupt	relearning	-11.22
75	7	somatosensory-abrupt	relearning	-5.429
76	7	somatosensory-abrupt	relearning	-5.79
77	7	somatosensory-abrupt	relearning	-1.432
78	7	somatosensory-abrupt	relearning	-1.362
79	7	somatosensory-abrupt	relearning	-2.12
80	7	somatosensory-abrupt	relearning	-4.947
81	7	somatosensory-abrupt	relearning	-7.113
82	7	somatosensory-abrupt	relearning	-9.151
83	7	somatosensory-abrupt	relearning	-5.564
84	7	somatosensory-abrupt	relearning	-5.543
86	7	somatosensory-abrupt	relearning	-10.293
87	7	somatosensory-abrupt	relearning	-7.515
88	7	somatosensory-abrupt	relearning	-7.53
89	7	somatosensory-abrupt	relearning	-1.168
90	7	somatosensory-abrupt	relearning	7.492
91	7	somatosensory-abrupt	relearning	0.54
92	7	somatosensory-abrupt	relearning	-2.718
93	7	somatosensory-abrupt	relearning	-5.146
94	7	somatosensory-abrupt	relearning	-5.823
95	7	somatosensory-abrupt	relearning	3.169
96	7	somatosensory-abrupt	relearning	-10.307
97	7	somatosensory-abrupt	relearning	8.126
98	7	somatosensory-abrupt	relearning	-2.741
99	7	somatosensory-abrupt	relearning	-0.863
100	7	somatosensory-abrupt	relearning	-13.253
101	7	somatosensory-abrupt	relearning	1.586
102	7	somatosensory-abrupt	relearning	-3.578
103	7	somatosensory-abrupt	relearning	-1.271
104	7	somatosensory-abrupt	relearning	-5.904
105	7	somatosensory-abrupt	relearning	2.016
106	7	somatosensory-abrupt	relearning	2.317
107	7	somatosensory-abrupt	relearning	-3.067
108	7	somatosensory-abrupt	relearning	-6.726
109	7	somatosensory-abrupt	relearning	1.709
110	7	somatosensory-abrupt	relearning	-8.511
111	7	somatosensory-abrupt	relearning	-8.522
112	7	somatosensory-abrupt	relearning	-7.517
113	7	somatosensory-abrupt	relearning	-6.976
114	7	somatosensory-abrupt	relearning	-6.69
116	7	somatosensory-abrupt	relearning	-7.072
117	7	somatosensory-abrupt	relearning	-5.891
118	7	somatosensory-abrupt	relearning	-1.78
119	7	somatosensory-abrupt	relearning	2.083
120	7	somatosensory-abrupt	relearning	2.935
121	7	somatosensory-abrupt	relearning	-2.694
122	7	somatosensory-abrupt	relearning	3.65
123	7	somatosensory-abrupt	relearning	-2.172
124	7	somatosensory-abrupt	relearning	-1.611
125	7	somatosensory-abrupt	relearning	-6.783
126	7	somatosensory-abrupt	relearning	-5.238
127	7	somatosensory-abrupt	relearning	4.137
128	7	somatosensory-abrupt	relearning	-7.468
129	7	somatosensory-abrupt	relearning	-2.07
130	7	somatosensory-abrupt	relearning	1.76
131	7	somatosensory-abrupt	relearning	9.304
132	7	somatosensory-abrupt	relearning	-5.633
133	7	somatosensory-abrupt	relearning	-8.233
134	7	somatosensory-abrupt	relearning	-5.936
135	7	somatosensory-abrupt	relearning	-5.314
136	7	somatosensory-abrupt	relearning	0.736
137	7	somatosensory-abrupt	relearning	-5.038
138	7	somatosensory-abrupt	relearning	-2.098
139	7	somatosensory-abrupt	relearning	-8.226
140	7	somatosensory-abrupt	relearning	-1.832
141	7	somatosensory-abrupt	relearning	-4.339
142	7	somatosensory-abrupt	relearning	-10.481
143	7	somatosensory-abrupt	relearning	-9.401
144	7	somatosensory-abrupt	relearning	-9.99
146	7	somatosensory-abrupt	relearning	-0.262
147	7	somatosensory-abrupt	relearning	-7.172
148	7	somatosensory-abrupt	relearning	-5.516
149	7	somatosensory-abrupt	relearning	-7.074
151	7	somatosensory-abrupt	relearning	-2.099
152	7	somatosensory-abrupt	relearning	-7.264
153	7	somatosensory-abrupt	relearning	-1.103
154	7	somatosensory-abrupt	relearning	-6.308
155	7	somatosensory-abrupt	relearning	-8.387
6	6	sham-abrupt	relearning	1.8728
7	6	sham-abrupt	relearning	-2.675
8	6	sham-abrupt	relearning	11.229
9	6	sham-abrupt	relearning	4.212
11	6	sham-abrupt	relearning	-11.682
12	6	sham-abrupt	relearning	12.371
13	6	sham-abrupt	relearning	-12.506
14	6	sham-abrupt	relearning	2.183
15	6	sham-abrupt	relearning	-8.306
16	6	sham-abrupt	relearning	7.774
17	6	sham-abrupt	relearning	6.484
18	6	sham-abrupt	relearning	5.81
19	6	sham-abrupt	relearning	12.064
20	6	sham-abrupt	relearning	1.132
21	6	sham-abrupt	relearning	-7.467
22	6	sham-abrupt	relearning	9.592
23	6	sham-abrupt	relearning	9.53
24	6	sham-abrupt	relearning	5.31
25	6	sham-abrupt	relearning	6.428
26	6	sham-abrupt	relearning	12.417
27	6	sham-abrupt	relearning	-6.567
28	6	sham-abrupt	relearning	0.713
29	6	sham-abrupt	relearning	-9.03
30	6	sham-abrupt	relearning	-11.666
31	6	sham-abrupt	relearning	2.234
32	6	sham-abrupt	relearning	4.348
33	6	sham-abrupt	relearning	13.005
34	6	sham-abrupt	relearning	7.339
35	6	sham-abrupt	relearning	10.476
36	6	sham-abrupt	relearning	6.744
37	6	sham-abrupt	relearning	23.332
38	6	sham-abrupt	relearning	-11.65
39	6	sham-abrupt	relearning	13.495
40	6	sham-abrupt	relearning	19.148
41	6	sham-abrupt	relearning	6.901
42	6	sham-abrupt	relearning	10.61
43	6	sham-abrupt	relearning	-3.023
44	6	sham-abrupt	relearning	11.776
45	6	sham-abrupt	relearning	5.684
46	6	sham-abrupt	relearning	11.606
47	6	sham-abrupt	relearning	9.891
48	6	sham-abrupt	relearning	2.08
49	6	sham-abrupt	relearning	-6.511
50	6	sham-abrupt	relearning	4.973
51	6	sham-abrupt	relearning	-0.885
52	6	sham-abrupt	relearning	-11.656
53	6	sham-abrupt	relearning	7.974
54	6	sham-abrupt	relearning	-1.203
56	6	sham-abrupt	relearning	-0.843
57	6	sham-abrupt	relearning	1.609
58	6	sham-abrupt	relearning	-7.205
59	6	sham-abrupt	relearning	3.149
60	6	sham-abrupt	relearning	0.232
61	6	sham-abrupt	relearning	-7.446
62	6	sham-abrupt	relearning	2.842
63	6	sham-abrupt	relearning	7.071
64	6	sham-abrupt	relearning	-5.806
65	6	sham-abrupt	relearning	0.355
66	6	sham-abrupt	relearning	-3.712
67	6	sham-abrupt	relearning	-1.189
68	6	sham-abrupt	relearning	16.633
69	6	sham-abrupt	relearning	-10.073
70	6	sham-abrupt	relearning	0.439
71	6	sham-abrupt	relearning	-5.361
72	6	sham-abrupt	relearning	-3.357
73	6	sham-abrupt	relearning	0.042
74	6	sham-abrupt	relearning	1.947
75	6	sham-abrupt	relearning	4.963
76	6	sham-abrupt	relearning	7.331
77	6	sham-abrupt	relearning	-8.727
78	6	sham-abrupt	relearning	4.482
79	6	sham-abrupt	relearning	1.519
80	6	sham-abrupt	relearning	0.26
81	6	sham-abrupt	relearning	-3.082
82	6	sham-abrupt	relearning	1.899
83	6	sham-abrupt	relearning	0.317
84	6	sham-abrupt	relearning	-0.598
86	6	sham-abrupt	relearning	9.238
87	6	sham-abrupt	relearning	2.281
88	6	sham-abrupt	relearning	4.973
89	6	sham-abrupt	relearning	3.719
90	6	sham-abrupt	relearning	3.305
91	6	sham-abrupt	relearning	-6.243
92	6	sham-abrupt	relearning	-8.432
93	6	sham-abrupt	relearning	-3.181
94	6	sham-abrupt	relearning	-0.73
95	6	sham-abrupt	relearning	-0.005
96	6	sham-abrupt	relearning	-8.512
97	6	sham-abrupt	relearning	7.618
98	6	sham-abrupt	relearning	-0.338
99	6	sham-abrupt	relearning	2.403
100	6	sham-abrupt	relearning	0.164
101	6	sham-abrupt	relearning	6.515
102	6	sham-abrupt	relearning	14.164
103	6	sham-abrupt	relearning	11.608
104	6	sham-abrupt	relearning	0.942
105	6	sham-abrupt	relearning	4.8
106	6	sham-abrupt	relearning	-3.08
107	6	sham-abrupt	relearning	-1.794
108	6	sham-abrupt	relearning	-6.603
109	6	sham-abrupt	relearning	11.84
110	6	sham-abrupt	relearning	-3.15
111	6	sham-abrupt	relearning	2.437
112	6	sham-abrupt	relearning	-1.898
113	6	sham-abrupt	relearning	6.062
114	6	sham-abrupt	relearning	2.811
116	6	sham-abrupt	relearning	-5.616
117	6	sham-abrupt	relearning	12.756
118	6	sham-abrupt	relearning	-5.596
119	6	sham-abrupt	relearning	11.762
120	6	sham-abrupt	relearning	10.514
121	6	sham-abrupt	relearning	1.608
122	6	sham-abrupt	relearning	9.415
123	6	sham-abrupt	relearning	9.387
124	6	sham-abrupt	relearning	4.656
125	6	sham-abrupt	relearning	0.197
126	6	sham-abrupt	relearning	5.331
127	6	sham-abrupt	relearning	-7.124
128	6	sham-abrupt	relearning	-0.977
129	6	sham-abrupt	relearning	-4.106
130	6	sham-abrupt	relearning	-8.888
131	6	sham-abrupt	relearning	3.556
132	6	sham-abrupt	relearning	0.373
133	6	sham-abrupt	relearning	-9.652
134	6	sham-abrupt	relearning	2.926
135	6	sham-abrupt	relearning	-3.354
136	6	sham-abrupt	relearning	6.749
137	6	sham-abrupt	relearning	-17.715
138	6	sham-abrupt	relearning	2.052
139	6	sham-abrupt	relearning	-2.601
140	6	sham-abrupt	relearning	-6.752
141	6	sham-abrupt	relearning	9.738
142	6	sham-abrupt	relearning	5.889
143	6	sham-abrupt	relearning	12.474
144	6	sham-abrupt	relearning	-5.039
146	6	sham-abrupt	relearning	6.454
147	6	sham-abrupt	relearning	8.638
148	6	sham-abrupt	relearning	6.748
149	6	sham-abrupt	relearning	0.126
151	6	sham-abrupt	relearning	6.19
152	6	sham-abrupt	relearning	-4.086
153	6	sham-abrupt	relearning	2.251
154	6	sham-abrupt	relearning	1.415
155	6	sham-abrupt	relearning	-8.837
6	8	somatosensory-abrupt	relearning	18.9
7	8	somatosensory-abrupt	relearning	-3.613
8	8	somatosensory-abrupt	relearning	12.094
9	8	somatosensory-abrupt	relearning	4.613
11	8	somatosensory-abrupt	relearning	10.714
12	8	somatosensory-abrupt	relearning	1.726
13	8	somatosensory-abrupt	relearning	4.685
14	8	somatosensory-abrupt	relearning	1.523
15	8	somatosensory-abrupt	relearning	0.337
16	8	somatosensory-abrupt	relearning	2.863
17	8	somatosensory-abrupt	relearning	5.399
18	8	somatosensory-abrupt	relearning	-0.194
19	8	somatosensory-abrupt	relearning	2.307
20	8	somatosensory-abrupt	relearning	0.226
21	8	somatosensory-abrupt	relearning	-3.384
22	8	somatosensory-abrupt	relearning	4.441
23	8	somatosensory-abrupt	relearning	2.582
24	8	somatosensory-abrupt	relearning	-0.707
25	8	somatosensory-abrupt	relearning	3.842
26	8	somatosensory-abrupt	relearning	-1.79
27	8	somatosensory-abrupt	relearning	-1.254
28	8	somatosensory-abrupt	relearning	1.102
29	8	somatosensory-abrupt	relearning	-0.787
30	8	somatosensory-abrupt	relearning	-2.906
31	8	somatosensory-abrupt	relearning	2.989
32	8	somatosensory-abrupt	relearning	5.512
33	8	somatosensory-abrupt	relearning	0.286
34	8	somatosensory-abrupt	relearning	-8.379
35	8	somatosensory-abrupt	relearning	4.819
36	8	somatosensory-abrupt	relearning	5.014
37	8	somatosensory-abrupt	relearning	2.665
38	8	somatosensory-abrupt	relearning	-2.368
39	8	somatosensory-abrupt	relearning	1.156
40	8	somatosensory-abrupt	relearning	1.413
41	8	somatosensory-abrupt	relearning	1.315
42	8	somatosensory-abrupt	relearning	12.227
43	8	somatosensory-abrupt	relearning	-6.37
44	8	somatosensory-abrupt	relearning	-2.157
45	8	somatosensory-abrupt	relearning	2.037
46	8	somatosensory-abrupt	relearning	1.691
47	8	somatosensory-abrupt	relearning	0.684
48	8	somatosensory-abrupt	relearning	4.689
49	8	somatosensory-abrupt	relearning	0.039
50	8	somatosensory-abrupt	relearning	6.493
51	8	somatosensory-abrupt	relearning	10.504
52	8	somatosensory-abrupt	relearning	7.694
53	8	somatosensory-abrupt	relearning	2.25
54	8	somatosensory-abrupt	relearning	-3.616
56	8	somatosensory-abrupt	relearning	5.366
57	8	somatosensory-abrupt	relearning	1.916
58	8	somatosensory-abrupt	relearning	-5.932
59	8	somatosensory-abrupt	relearning	1.232
60	8	somatosensory-abrupt	relearning	1.524
61	8	somatosensory-abrupt	relearning	3.564
62	8	somatosensory-abrupt	relearning	-4.102
63	8	somatosensory-abrupt	relearning	0.624
64	8	somatosensory-abrupt	relearning	0.545
65	8	somatosensory-abrupt	relearning	-1.714
66	8	somatosensory-abrupt	relearning	2.898
67	8	somatosensory-abrupt	relearning	-0.899
68	8	somatosensory-abrupt	relearning	-5.902
69	8	somatosensory-abrupt	relearning	-2.346
70	8	somatosensory-abrupt	relearning	-2.532
71	8	somatosensory-abrupt	relearning	3.343
72	8	somatosensory-abrupt	relearning	1.157
73	8	somatosensory-abrupt	relearning	-1.422
74	8	somatosensory-abrupt	relearning	-3.628
75	8	somatosensory-abrupt	relearning	-2.395
76	8	somatosensory-abrupt	relearning	-0.882
77	8	somatosensory-abrupt	relearning	6.651
78	8	somatosensory-abrupt	relearning	-3.415
79	8	somatosensory-abrupt	relearning	-2.477
80	8	somatosensory-abrupt	relearning	4.662
81	8	somatosensory-abrupt	relearning	-2.819
82	8	somatosensory-abrupt	relearning	-2.739
83	8	somatosensory-abrupt	relearning	5.2
84	8	somatosensory-abrupt	relearning	-0.353
86	8	somatosensory-abrupt	relearning	-1.643
87	8	somatosensory-abrupt	relearning	-0.063
88	8	somatosensory-abrupt	relearning	1.977
89	8	somatosensory-abrupt	relearning	2.191
90	8	somatosensory-abrupt	relearning	-5.746
91	8	somatosensory-abrupt	relearning	-8.036
92	8	somatosensory-abrupt	relearning	3.463
93	8	somatosensory-abrupt	relearning	-3.489
94	8	somatosensory-abrupt	relearning	-3.844
95	8	somatosensory-abrupt	relearning	-0.011
96	8	somatosensory-abrupt	relearning	-0.797
97	8	somatosensory-abrupt	relearning	1.85
98	8	somatosensory-abrupt	relearning	-0.346
99	8	somatosensory-abrupt	relearning	-8.411
100	8	somatosensory-abrupt	relearning	0.854
101	8	somatosensory-abrupt	relearning	-3.693
102	8	somatosensory-abrupt	relearning	0.57
103	8	somatosensory-abrupt	relearning	-6.187
104	8	somatosensory-abrupt	relearning	3.349
105	8	somatosensory-abrupt	relearning	-0.095
106	8	somatosensory-abrupt	relearning	9.403
107	8	somatosensory-abrupt	relearning	-0.878
108	8	somatosensory-abrupt	relearning	-1.162
109	8	somatosensory-abrupt	relearning	-1.153
110	8	somatosensory-abrupt	relearning	3.68
111	8	somatosensory-abrupt	relearning	-5.18
112	8	somatosensory-abrupt	relearning	-5.836
113	8	somatosensory-abrupt	relearning	-2.112
114	8	somatosensory-abrupt	relearning	4.249
116	8	somatosensory-abrupt	relearning	1.609
117	8	somatosensory-abrupt	relearning	-5.735
118	8	somatosensory-abrupt	relearning	-2.83
119	8	somatosensory-abrupt	relearning	0.081
120	8	somatosensory-abrupt	relearning	-0.855
121	8	somatosensory-abrupt	relearning	-0.964
122	8	somatosensory-abrupt	relearning	1.238
123	8	somatosensory-abrupt	relearning	2.803
124	8	somatosensory-abrupt	relearning	-1.97
125	8	somatosensory-abrupt	relearning	1.662
126	8	somatosensory-abrupt	relearning	-2.53
127	8	somatosensory-abrupt	relearning	0.856
128	8	somatosensory-abrupt	relearning	-0.123
129	8	somatosensory-abrupt	relearning	-2.223
130	8	somatosensory-abrupt	relearning	-2.393
131	8	somatosensory-abrupt	relearning	-4.848
132	8	somatosensory-abrupt	relearning	-4.022
133	8	somatosensory-abrupt	relearning	-3.546
134	8	somatosensory-abrupt	relearning	-4.09
135	8	somatosensory-abrupt	relearning	-7.01
136	8	somatosensory-abrupt	relearning	1.105
137	8	somatosensory-abrupt	relearning	1.951
138	8	somatosensory-abrupt	relearning	-1.71
139	8	somatosensory-abrupt	relearning	1.438
140	8	somatosensory-abrupt	relearning	2.146
141	8	somatosensory-abrupt	relearning	-0.271
142	8	somatosensory-abrupt	relearning	-0.378
143	8	somatosensory-abrupt	relearning	6.158
144	8	somatosensory-abrupt	relearning	-4.341
146	8	somatosensory-abrupt	relearning	-1.521
147	8	somatosensory-abrupt	relearning	0.895
148	8	somatosensory-abrupt	relearning	-2.924
149	8	somatosensory-abrupt	relearning	-3.477
151	8	somatosensory-abrupt	relearning	-1.071
152	8	somatosensory-abrupt	relearning	2.55
153	8	somatosensory-abrupt	relearning	3.953
154	8	somatosensory-abrupt	relearning	-0.769
155	8	somatosensory-abrupt	relearning	0.678
6	10	sham-abrupt	relearning	11.213
7	10	sham-abrupt	relearning	-1.9
8	10	sham-abrupt	relearning	0.041
9	10	sham-abrupt	relearning	2.679
11	10	sham-abrupt	relearning	3.299
12	10	sham-abrupt	relearning	3.138
13	10	sham-abrupt	relearning	3.021
14	10	sham-abrupt	relearning	1.254
15	10	sham-abrupt	relearning	2.127
16	10	sham-abrupt	relearning	2.829
17	10	sham-abrupt	relearning	4.539
18	10	sham-abrupt	relearning	-2.406
19	10	sham-abrupt	relearning	3.92
20	10	sham-abrupt	relearning	0.686
21	10	sham-abrupt	relearning	-3.103
22	10	sham-abrupt	relearning	4.18
23	10	sham-abrupt	relearning	1.407
24	10	sham-abrupt	relearning	-2.42
25	10	sham-abrupt	relearning	2.482
26	10	sham-abrupt	relearning	-8.705
27	10	sham-abrupt	relearning	4.494
28	10	sham-abrupt	relearning	-7.334
29	10	sham-abrupt	relearning	4.067
30	10	sham-abrupt	relearning	0.449
31	10	sham-abrupt	relearning	2.247
32	10	sham-abrupt	relearning	-4.689
33	10	sham-abrupt	relearning	3.367
34	10	sham-abrupt	relearning	0.64
35	10	sham-abrupt	relearning	-0.235
36	10	sham-abrupt	relearning	1.343
37	10	sham-abrupt	relearning	0.001
38	10	sham-abrupt	relearning	6.474
39	10	sham-abrupt	relearning	1.18
40	10	sham-abrupt	relearning	-0.313
41	10	sham-abrupt	relearning	5.324
42	10	sham-abrupt	relearning	-1.563
43	10	sham-abrupt	relearning	2.147
44	10	sham-abrupt	relearning	2.967
45	10	sham-abrupt	relearning	-1.509
46	10	sham-abrupt	relearning	0.651
47	10	sham-abrupt	relearning	0.514
48	10	sham-abrupt	relearning	1.823
49	10	sham-abrupt	relearning	7.73
50	10	sham-abrupt	relearning	0.034
51	10	sham-abrupt	relearning	-1.548
52	10	sham-abrupt	relearning	-0.905
53	10	sham-abrupt	relearning	3.304
54	10	sham-abrupt	relearning	-2.628
56	10	sham-abrupt	relearning	2.309
57	10	sham-abrupt	relearning	-1.087
58	10	sham-abrupt	relearning	6.739
59	10	sham-abrupt	relearning	-3.523
60	10	sham-abrupt	relearning	4.426
61	10	sham-abrupt	relearning	-2.557
62	10	sham-abrupt	relearning	1.928
63	10	sham-abrupt	relearning	1.094
64	10	sham-abrupt	relearning	0.689
65	10	sham-abrupt	relearning	-0.875
66	10	sham-abrupt	relearning	1.255
67	10	sham-abrupt	relearning	8.733
68	10	sham-abrupt	relearning	2.266
69	10	sham-abrupt	relearning	1.543
70	10	sham-abrupt	relearning	-3.167
71	10	sham-abrupt	relearning	-4.571
72	10	sham-abrupt	relearning	0.719
73	10	sham-abrupt	relearning	2.106
74	10	sham-abrupt	relearning	-0.79
75	10	sham-abrupt	relearning	3.669
76	10	sham-abrupt	relearning	1.633
77	10	sham-abrupt	relearning	4.556
78	10	sham-abrupt	relearning	2.694
79	10	sham-abrupt	relearning	-0.606
80	10	sham-abrupt	relearning	-2.509
81	10	sham-abrupt	relearning	-2.806
82	10	sham-abrupt	relearning	-5.107
83	10	sham-abrupt	relearning	-3.515
84	10	sham-abrupt	relearning	5.593
86	10	sham-abrupt	relearning	4.298
87	10	sham-abrupt	relearning	-0.719
88	10	sham-abrupt	relearning	6.6
89	10	sham-abrupt	relearning	-1.561
90	10	sham-abrupt	relearning	1.397
91	10	sham-abrupt	relearning	-0.087
92	10	sham-abrupt	relearning	0.619
93	10	sham-abrupt	relearning	-1.777
94	10	sham-abrupt	relearning	2.354
95	10	sham-abrupt	relearning	1.52
96	10	sham-abrupt	relearning	-0.134
97	10	sham-abrupt	relearning	-1.124
98	10	sham-abrupt	relearning	1.192
99	10	sham-abrupt	relearning	4.454
100	10	sham-abrupt	relearning	-0.106
101	10	sham-abrupt	relearning	1.18
102	10	sham-abrupt	relearning	-3.707
103	10	sham-abrupt	relearning	-1.677
104	10	sham-abrupt	relearning	-1.642
105	10	sham-abrupt	relearning	3.741
106	10	sham-abrupt	relearning	2.133
107	10	sham-abrupt	relearning	2.319
108	10	sham-abrupt	relearning	-5.618
109	10	sham-abrupt	relearning	-2.241
110	10	sham-abrupt	relearning	-4.207
111	10	sham-abrupt	relearning	-0.973
112	10	sham-abrupt	relearning	-1.851
113	10	sham-abrupt	relearning	-0.161
114	10	sham-abrupt	relearning	3.26
116	10	sham-abrupt	relearning	0.937
117	10	sham-abrupt	relearning	3.981
118	10	sham-abrupt	relearning	3.002
119	10	sham-abrupt	relearning	-1.819
120	10	sham-abrupt	relearning	4.904
121	10	sham-abrupt	relearning	0.691
122	10	sham-abrupt	relearning	-5.662
123	10	sham-abrupt	relearning	3.733
124	10	sham-abrupt	relearning	3.972
125	10	sham-abrupt	relearning	-4.394
126	10	sham-abrupt	relearning	2.052
127	10	sham-abrupt	relearning	1.405
128	10	sham-abrupt	relearning	6.263
129	10	sham-abrupt	relearning	1.554
130	10	sham-abrupt	relearning	-0.722
131	10	sham-abrupt	relearning	-4.181
132	10	sham-abrupt	relearning	-1.03
133	10	sham-abrupt	relearning	-1.842
134	10	sham-abrupt	relearning	-2.237
135	10	sham-abrupt	relearning	-1.952
136	10	sham-abrupt	relearning	-3.341
137	10	sham-abrupt	relearning	7.223
138	10	sham-abrupt	relearning	-2.961
139	10	sham-abrupt	relearning	0.927
140	10	sham-abrupt	relearning	-3.427
141	10	sham-abrupt	relearning	-3.496
142	10	sham-abrupt	relearning	0.136
143	10	sham-abrupt	relearning	1.513
144	10	sham-abrupt	relearning	0.39
146	10	sham-abrupt	relearning	3.568
147	10	sham-abrupt	relearning	4.677
148	10	sham-abrupt	relearning	0.241
149	10	sham-abrupt	relearning	-7.071
151	10	sham-abrupt	relearning	-1.268
152	10	sham-abrupt	relearning	3.579
153	10	sham-abrupt	relearning	0.222
154	10	sham-abrupt	relearning	-0.997
155	10	sham-abrupt	relearning	2.208
6	11	sham-abrupt	relearning	2.7559
7	11	sham-abrupt	relearning	-7.347
8	11	sham-abrupt	relearning	5.585
9	11	sham-abrupt	relearning	0.871
11	11	sham-abrupt	relearning	4.576
12	11	sham-abrupt	relearning	4.387
13	11	sham-abrupt	relearning	-2.885
14	11	sham-abrupt	relearning	-11.211
15	11	sham-abrupt	relearning	6.133
16	11	sham-abrupt	relearning	6.816
17	11	sham-abrupt	relearning	-0.225
18	11	sham-abrupt	relearning	-6.966
19	11	sham-abrupt	relearning	-3.429
20	11	sham-abrupt	relearning	7.523
21	11	sham-abrupt	relearning	0.993
22	11	sham-abrupt	relearning	4.143
23	11	sham-abrupt	relearning	1.507
24	11	sham-abrupt	relearning	11.505
25	11	sham-abrupt	relearning	-8.123
26	11	sham-abrupt	relearning	6.867
27	11	sham-abrupt	relearning	-2.866
28	11	sham-abrupt	relearning	5.624
29	11	sham-abrupt	relearning	1.966
30	11	sham-abrupt	relearning	5.235
31	11	sham-abrupt	relearning	1.491
32	11	sham-abrupt	relearning	6.192
33	11	sham-abrupt	relearning	3.363
34	11	sham-abrupt	relearning	8.495
35	11	sham-abrupt	relearning	1.68
36	11	sham-abrupt	relearning	9.684
37	11	sham-abrupt	relearning	2.288
38	11	sham-abrupt	relearning	1.02
39	11	sham-abrupt	relearning	0.467
40	11	sham-abrupt	relearning	9.657
41	11	sham-abrupt	relearning	5.611
42	11	sham-abrupt	relearning	-5.851
43	11	sham-abrupt	relearning	3.09
44	11	sham-abrupt	relearning	6.823
45	11	sham-abrupt	relearning	4.579
46	11	sham-abrupt	relearning	-0.401
47	11	sham-abrupt	relearning	-0.914
48	11	sham-abrupt	relearning	2.756
49	11	sham-abrupt	relearning	6.305
50	11	sham-abrupt	relearning	8.176
51	11	sham-abrupt	relearning	1.691
52	11	sham-abrupt	relearning	1.34
53	11	sham-abrupt	relearning	4.26
54	11	sham-abrupt	relearning	-3.927
56	11	sham-abrupt	relearning	-2.213
57	11	sham-abrupt	relearning	-0.97
58	11	sham-abrupt	relearning	1.622
59	11	sham-abrupt	relearning	-8.552
60	11	sham-abrupt	relearning	5.561
61	11	sham-abrupt	relearning	2.459
62	11	sham-abrupt	relearning	-4.084
63	11	sham-abrupt	relearning	1.561
64	11	sham-abrupt	relearning	-1.527
65	11	sham-abrupt	relearning	0.094
66	11	sham-abrupt	relearning	-2.522
67	11	sham-abrupt	relearning	0.263
68	11	sham-abrupt	relearning	0.28
69	11	sham-abrupt	relearning	6.018
70	11	sham-abrupt	relearning	3.453
71	11	sham-abrupt	relearning	5.924
72	11	sham-abrupt	relearning	-2.292
73	11	sham-abrupt	relearning	-1.907
74	11	sham-abrupt	relearning	-4.266
75	11	sham-abrupt	relearning	6.256
76	11	sham-abrupt	relearning	-4.97
77	11	sham-abrupt	relearning	10.618
78	11	sham-abrupt	relearning	3.831
79	11	sham-abrupt	relearning	-6.617
80	11	sham-abrupt	relearning	-3.571
81	11	sham-abrupt	relearning	6.626
82	11	sham-abrupt	relearning	12.25
83	11	sham-abrupt	relearning	-6.758
84	11	sham-abrupt	relearning	-8.602
86	11	sham-abrupt	relearning	-2.725
87	11	sham-abrupt	relearning	0.958
88	11	sham-abrupt	relearning	10.011
89	11	sham-abrupt	relearning	-2.358
90	11	sham-abrupt	relearning	-6.314
91	11	sham-abrupt	relearning	3.105
92	11	sham-abrupt	relearning	-0.248
93	11	sham-abrupt	relearning	-12.013
94	11	sham-abrupt	relearning	8.892
95	11	sham-abrupt	relearning	4.053
96	11	sham-abrupt	relearning	-5.686
97	11	sham-abrupt	relearning	2.772
98	11	sham-abrupt	relearning	4.703
99	11	sham-abrupt	relearning	6.464
100	11	sham-abrupt	relearning	9.512
101	11	sham-abrupt	relearning	4.69
102	11	sham-abrupt	relearning	9.18
103	11	sham-abrupt	relearning	7.731
104	11	sham-abrupt	relearning	-2.196
105	11	sham-abrupt	relearning	3.742
106	11	sham-abrupt	relearning	-3.387
107	11	sham-abrupt	relearning	3.493
108	11	sham-abrupt	relearning	1.359
109	11	sham-abrupt	relearning	11.306
110	11	sham-abrupt	relearning	0.022
111	11	sham-abrupt	relearning	0.981
112	11	sham-abrupt	relearning	7.359
113	11	sham-abrupt	relearning	4.573
114	11	sham-abrupt	relearning	6.492
116	11	sham-abrupt	relearning	2.078
117	11	sham-abrupt	relearning	-4.49
118	11	sham-abrupt	relearning	0.997
119	11	sham-abrupt	relearning	-7.584
120	11	sham-abrupt	relearning	-2.635
121	11	sham-abrupt	relearning	13.921
122	11	sham-abrupt	relearning	-1.515
123	11	sham-abrupt	relearning	10.875
124	11	sham-abrupt	relearning	10.484
125	11	sham-abrupt	relearning	4.471
126	11	sham-abrupt	relearning	2.954
127	11	sham-abrupt	relearning	5.164
128	11	sham-abrupt	relearning	0.832
129	11	sham-abrupt	relearning	1.684
130	11	sham-abrupt	relearning	0.987
131	11	sham-abrupt	relearning	-1.377
132	11	sham-abrupt	relearning	4.885
133	11	sham-abrupt	relearning	6.284
134	11	sham-abrupt	relearning	-1.505
135	11	sham-abrupt	relearning	-2.653
136	11	sham-abrupt	relearning	-2.964
137	11	sham-abrupt	relearning	1.132
138	11	sham-abrupt	relearning	-1.438
139	11	sham-abrupt	relearning	-0.069
140	11	sham-abrupt	relearning	-2.264
141	11	sham-abrupt	relearning	-4.101
142	11	sham-abrupt	relearning	-3.161
143	11	sham-abrupt	relearning	9.219
144	11	sham-abrupt	relearning	-2.604
146	11	sham-abrupt	relearning	2.022
147	11	sham-abrupt	relearning	-3.289
148	11	sham-abrupt	relearning	2.526
149	11	sham-abrupt	relearning	-2.509
151	11	sham-abrupt	relearning	-4.712
152	11	sham-abrupt	relearning	-3.298
153	11	sham-abrupt	relearning	-0.263
154	11	sham-abrupt	relearning	-2.775
155	11	sham-abrupt	relearning	2.001
6	12	somatosensory-abrupt	relearning	20.81
7	12	somatosensory-abrupt	relearning	5.911
8	12	somatosensory-abrupt	relearning	2.278
9	12	somatosensory-abrupt	relearning	7.013
11	12	somatosensory-abrupt	relearning	-2.031
12	12	somatosensory-abrupt	relearning	6.979
13	12	somatosensory-abrupt	relearning	-2.404
14	12	somatosensory-abrupt	relearning	7.608
15	12	somatosensory-abrupt	relearning	-0.442
16	12	somatosensory-abrupt	relearning	-3.784
17	12	somatosensory-abrupt	relearning	-5.79
18	12	somatosensory-abrupt	relearning	6.869
19	12	somatosensory-abrupt	relearning	-0.188
20	12	somatosensory-abrupt	relearning	-0.054
21	12	somatosensory-abrupt	relearning	5.715
22	12	somatosensory-abrupt	relearning	-2.48
23	12	somatosensory-abrupt	relearning	2.448
24	12	somatosensory-abrupt	relearning	3.674
25	12	somatosensory-abrupt	relearning	-1.217
26	12	somatosensory-abrupt	relearning	-0.167
27	12	somatosensory-abrupt	relearning	1.116
28	12	somatosensory-abrupt	relearning	-5.659
29	12	somatosensory-abrupt	relearning	0.256
30	12	somatosensory-abrupt	relearning	5.911
31	12	somatosensory-abrupt	relearning	4.695
32	12	somatosensory-abrupt	relearning	2.6
33	12	somatosensory-abrupt	relearning	3.963
34	12	somatosensory-abrupt	relearning	-1.307
35	12	somatosensory-abrupt	relearning	0.614
36	12	somatosensory-abrupt	relearning	-2.505
37	12	somatosensory-abrupt	relearning	0.474
38	12	somatosensory-abrupt	relearning	-0.294
39	12	somatosensory-abrupt	relearning	-1.649
40	12	somatosensory-abrupt	relearning	9.206
41	12	somatosensory-abrupt	relearning	5.225
42	12	somatosensory-abrupt	relearning	0.602
43	12	somatosensory-abrupt	relearning	-5.63
44	12	somatosensory-abrupt	relearning	1.492
45	12	somatosensory-abrupt	relearning	2.097
46	12	somatosensory-abrupt	relearning	3.829
47	12	somatosensory-abrupt	relearning	3.401
48	12	somatosensory-abrupt	relearning	3.559
49	12	somatosensory-abrupt	relearning	3.384
50	12	somatosensory-abrupt	relearning	-3.606
51	12	somatosensory-abrupt	relearning	3.887
52	12	somatosensory-abrupt	relearning	6.399
53	12	somatosensory-abrupt	relearning	3.35
54	12	somatosensory-abrupt	relearning	0.57
56	12	somatosensory-abrupt	relearning	4.45
57	12	somatosensory-abrupt	relearning	5.322
58	12	somatosensory-abrupt	relearning	-2.046
59	12	somatosensory-abrupt	relearning	3.918
60	12	somatosensory-abrupt	relearning	4.05
61	12	somatosensory-abrupt	relearning	6.098
62	12	somatosensory-abrupt	relearning	-1.987
63	12	somatosensory-abrupt	relearning	-0.988
64	12	somatosensory-abrupt	relearning	6.208
65	12	somatosensory-abrupt	relearning	-2.191
66	12	somatosensory-abrupt	relearning	2.644
67	12	somatosensory-abrupt	relearning	1.828
68	12	somatosensory-abrupt	relearning	5.301
69	12	somatosensory-abrupt	relearning	6.773
70	12	somatosensory-abrupt	relearning	4.181
71	12	somatosensory-abrupt	relearning	1.678
72	12	somatosensory-abrupt	relearning	4.174
73	12	somatosensory-abrupt	relearning	2.638
74	12	somatosensory-abrupt	relearning	0.97
75	12	somatosensory-abrupt	relearning	7.857
76	12	somatosensory-abrupt	relearning	2.106
77	12	somatosensory-abrupt	relearning	4.973
78	12	somatosensory-abrupt	relearning	3.086
79	12	somatosensory-abrupt	relearning	-3.326
80	12	somatosensory-abrupt	relearning	4.909
81	12	somatosensory-abrupt	relearning	-0.991
82	12	somatosensory-abrupt	relearning	2.191
83	12	somatosensory-abrupt	relearning	0.964
84	12	somatosensory-abrupt	relearning	8.849
86	12	somatosensory-abrupt	relearning	0.694
87	12	somatosensory-abrupt	relearning	1.233
88	12	somatosensory-abrupt	relearning	-0.851
89	12	somatosensory-abrupt	relearning	3.445
90	12	somatosensory-abrupt	relearning	3.9
91	12	somatosensory-abrupt	relearning	2.23
92	12	somatosensory-abrupt	relearning	2.426
93	12	somatosensory-abrupt	relearning	-3.562
94	12	somatosensory-abrupt	relearning	3.578
95	12	somatosensory-abrupt	relearning	-0.809
96	12	somatosensory-abrupt	relearning	1.548
97	12	somatosensory-abrupt	relearning	0.682
98	12	somatosensory-abrupt	relearning	-0.395
99	12	somatosensory-abrupt	relearning	6.032
100	12	somatosensory-abrupt	relearning	5.462
101	12	somatosensory-abrupt	relearning	-2.664
102	12	somatosensory-abrupt	relearning	1.643
103	12	somatosensory-abrupt	relearning	3.2
104	12	somatosensory-abrupt	relearning	-5.634
105	12	somatosensory-abrupt	relearning	-2.355
106	12	somatosensory-abrupt	relearning	5.353
107	12	somatosensory-abrupt	relearning	-7.937
108	12	somatosensory-abrupt	relearning	7.376
109	12	somatosensory-abrupt	relearning	7.209
110	12	somatosensory-abrupt	relearning	4.016
111	12	somatosensory-abrupt	relearning	2.092
112	12	somatosensory-abrupt	relearning	2.709
113	12	somatosensory-abrupt	relearning	-0.307
114	12	somatosensory-abrupt	relearning	-1.763
116	12	somatosensory-abrupt	relearning	0.447
117	12	somatosensory-abrupt	relearning	5.642
118	12	somatosensory-abrupt	relearning	-0.282
119	12	somatosensory-abrupt	relearning	-6.797
120	12	somatosensory-abrupt	relearning	-6.197
121	12	somatosensory-abrupt	relearning	-2.802
122	12	somatosensory-abrupt	relearning	1.141
123	12	somatosensory-abrupt	relearning	0.509
124	12	somatosensory-abrupt	relearning	-1.5
125	12	somatosensory-abrupt	relearning	-0.775
126	12	somatosensory-abrupt	relearning	3.152
127	12	somatosensory-abrupt	relearning	-0.864
128	12	somatosensory-abrupt	relearning	-4.294
129	12	somatosensory-abrupt	relearning	1.176
130	12	somatosensory-abrupt	relearning	1.364
131	12	somatosensory-abrupt	relearning	-0.296
132	12	somatosensory-abrupt	relearning	2.112
133	12	somatosensory-abrupt	relearning	-5.499
134	12	somatosensory-abrupt	relearning	-0.295
135	12	somatosensory-abrupt	relearning	1.754
136	12	somatosensory-abrupt	relearning	1.994
137	12	somatosensory-abrupt	relearning	3.215
138	12	somatosensory-abrupt	relearning	2.504
139	12	somatosensory-abrupt	relearning	-0.394
140	12	somatosensory-abrupt	relearning	7.767
141	12	somatosensory-abrupt	relearning	3.634
142	12	somatosensory-abrupt	relearning	-0.837
143	12	somatosensory-abrupt	relearning	-2.003
144	12	somatosensory-abrupt	relearning	-3.335
146	12	somatosensory-abrupt	relearning	4.547
147	12	somatosensory-abrupt	relearning	3.965
148	12	somatosensory-abrupt	relearning	6.351
149	12	somatosensory-abrupt	relearning	0.454
151	12	somatosensory-abrupt	relearning	2.474
152	12	somatosensory-abrupt	relearning	-3.378
153	12	somatosensory-abrupt	relearning	2.517
154	12	somatosensory-abrupt	relearning	2.917
155	12	somatosensory-abrupt	relearning	0.265
6	22	somatosensory-abrupt	relearning	30.645
7	22	somatosensory-abrupt	relearning	-10.058
8	22	somatosensory-abrupt	relearning	-1.18
9	22	somatosensory-abrupt	relearning	-4.755
11	22	somatosensory-abrupt	relearning	2.461
12	22	somatosensory-abrupt	relearning	-12.612
13	22	somatosensory-abrupt	relearning	2.335
14	22	somatosensory-abrupt	relearning	-15.63
15	22	somatosensory-abrupt	relearning	2.885
16	22	somatosensory-abrupt	relearning	-4.024
17	22	somatosensory-abrupt	relearning	-7.616
18	22	somatosensory-abrupt	relearning	-3.926
19	22	somatosensory-abrupt	relearning	-4.89
20	22	somatosensory-abrupt	relearning	-1.057
21	22	somatosensory-abrupt	relearning	0.44
22	22	somatosensory-abrupt	relearning	1.775
23	22	somatosensory-abrupt	relearning	-3.628
24	22	somatosensory-abrupt	relearning	-0.55
25	22	somatosensory-abrupt	relearning	0.58
26	22	somatosensory-abrupt	relearning	-4.635
27	22	somatosensory-abrupt	relearning	6.199
28	22	somatosensory-abrupt	relearning	-3.51
29	22	somatosensory-abrupt	relearning	-3.31
30	22	somatosensory-abrupt	relearning	-4.638
31	22	somatosensory-abrupt	relearning	-3.477
32	22	somatosensory-abrupt	relearning	1.324
33	22	somatosensory-abrupt	relearning	-11.165
34	22	somatosensory-abrupt	relearning	-8.029
35	22	somatosensory-abrupt	relearning	7.62
36	22	somatosensory-abrupt	relearning	-4.138
37	22	somatosensory-abrupt	relearning	-8.072
38	22	somatosensory-abrupt	relearning	-2.739
39	22	somatosensory-abrupt	relearning	-8.283
40	22	somatosensory-abrupt	relearning	0.826
41	22	somatosensory-abrupt	relearning	-10.01
42	22	somatosensory-abrupt	relearning	8.942
43	22	somatosensory-abrupt	relearning	-3.418
44	22	somatosensory-abrupt	relearning	-8.165
45	22	somatosensory-abrupt	relearning	3.003
46	22	somatosensory-abrupt	relearning	5.357
47	22	somatosensory-abrupt	relearning	-5.285
48	22	somatosensory-abrupt	relearning	-1.019
49	22	somatosensory-abrupt	relearning	-1.843
50	22	somatosensory-abrupt	relearning	-5.567
51	22	somatosensory-abrupt	relearning	-2.209
52	22	somatosensory-abrupt	relearning	-14.319
53	22	somatosensory-abrupt	relearning	2.581
54	22	somatosensory-abrupt	relearning	-4.029
56	22	somatosensory-abrupt	relearning	3.558
57	22	somatosensory-abrupt	relearning	-9.208
58	22	somatosensory-abrupt	relearning	1.429
59	22	somatosensory-abrupt	relearning	-2.117
60	22	somatosensory-abrupt	relearning	-7.456
61	22	somatosensory-abrupt	relearning	-4.153
62	22	somatosensory-abrupt	relearning	-0.082
63	22	somatosensory-abrupt	relearning	1.771
64	22	somatosensory-abrupt	relearning	-1.925
65	22	somatosensory-abrupt	relearning	-4.249
66	22	somatosensory-abrupt	relearning	-0.272
67	22	somatosensory-abrupt	relearning	-2.743
68	22	somatosensory-abrupt	relearning	-4.419
69	22	somatosensory-abrupt	relearning	-10.25
70	22	somatosensory-abrupt	relearning	-5.17
71	22	somatosensory-abrupt	relearning	-5.775
72	22	somatosensory-abrupt	relearning	-0.117
73	22	somatosensory-abrupt	relearning	-5.664
74	22	somatosensory-abrupt	relearning	-6.115
75	22	somatosensory-abrupt	relearning	-0.801
76	22	somatosensory-abrupt	relearning	5.548
77	22	somatosensory-abrupt	relearning	-6.321
78	22	somatosensory-abrupt	relearning	0.131
79	22	somatosensory-abrupt	relearning	3.041
80	22	somatosensory-abrupt	relearning	-3.086
81	22	somatosensory-abrupt	relearning	-12.659
82	22	somatosensory-abrupt	relearning	-7.241
83	22	somatosensory-abrupt	relearning	-0.542
84	22	somatosensory-abrupt	relearning	0.941
86	22	somatosensory-abrupt	relearning	-1.104
87	22	somatosensory-abrupt	relearning	-6.584
88	22	somatosensory-abrupt	relearning	-3.175
89	22	somatosensory-abrupt	relearning	5.376
90	22	somatosensory-abrupt	relearning	-9.46
91	22	somatosensory-abrupt	relearning	-6.204
92	22	somatosensory-abrupt	relearning	-7.044
93	22	somatosensory-abrupt	relearning	0.913
94	22	somatosensory-abrupt	relearning	2.584
95	22	somatosensory-abrupt	relearning	2.649
96	22	somatosensory-abrupt	relearning	-8.216
97	22	somatosensory-abrupt	relearning	-0.568
98	22	somatosensory-abrupt	relearning	-2.647
99	22	somatosensory-abrupt	relearning	-1.73
100	22	somatosensory-abrupt	relearning	-7.656
101	22	somatosensory-abrupt	relearning	-7.758
102	22	somatosensory-abrupt	relearning	5.636
103	22	somatosensory-abrupt	relearning	-4.612
104	22	somatosensory-abrupt	relearning	-2.677
105	22	somatosensory-abrupt	relearning	-9.07
106	22	somatosensory-abrupt	relearning	0.456
107	22	somatosensory-abrupt	relearning	4.983
108	22	somatosensory-abrupt	relearning	-3.356
109	22	somatosensory-abrupt	relearning	-10.193
110	22	somatosensory-abrupt	relearning	8.217
111	22	somatosensory-abrupt	relearning	-8.598
112	22	somatosensory-abrupt	relearning	-1.869
113	22	somatosensory-abrupt	relearning	-5.631
114	22	somatosensory-abrupt	relearning	-6.752
116	22	somatosensory-abrupt	relearning	-4.807
117	22	somatosensory-abrupt	relearning	4.785
118	22	somatosensory-abrupt	relearning	-2.76
119	22	somatosensory-abrupt	relearning	0.975
120	22	somatosensory-abrupt	relearning	-12.31
121	22	somatosensory-abrupt	relearning	-6.035
122	22	somatosensory-abrupt	relearning	2.424
123	22	somatosensory-abrupt	relearning	0.545
124	22	somatosensory-abrupt	relearning	-1.889
125	22	somatosensory-abrupt	relearning	-0.157
126	22	somatosensory-abrupt	relearning	-1.622
127	22	somatosensory-abrupt	relearning	0.128
128	22	somatosensory-abrupt	relearning	-0.799
129	22	somatosensory-abrupt	relearning	-3.13
130	22	somatosensory-abrupt	relearning	-1.859
131	22	somatosensory-abrupt	relearning	-2.629
132	22	somatosensory-abrupt	relearning	-4.615
133	22	somatosensory-abrupt	relearning	0.316
134	22	somatosensory-abrupt	relearning	-6.641
135	22	somatosensory-abrupt	relearning	0.169
136	22	somatosensory-abrupt	relearning	-7.252
137	22	somatosensory-abrupt	relearning	-5.547
138	22	somatosensory-abrupt	relearning	4.922
139	22	somatosensory-abrupt	relearning	-1.971
140	22	somatosensory-abrupt	relearning	8.364
141	22	somatosensory-abrupt	relearning	0.194
142	22	somatosensory-abrupt	relearning	0.51
143	22	somatosensory-abrupt	relearning	-9.25
144	22	somatosensory-abrupt	relearning	-2.947
146	22	somatosensory-abrupt	relearning	-6.677
147	22	somatosensory-abrupt	relearning	-4.109
148	22	somatosensory-abrupt	relearning	-3.149
149	22	somatosensory-abrupt	relearning	2.431
151	22	somatosensory-abrupt	relearning	-2.471
152	22	somatosensory-abrupt	relearning	5.05
153	22	somatosensory-abrupt	relearning	-11.139
154	22	somatosensory-abrupt	relearning	-5.707
155	22	somatosensory-abrupt	relearning	-3.055
6	25	somatosensory-abrupt	relearning	16.9
7	25	somatosensory-abrupt	relearning	8.847
8	25	somatosensory-abrupt	relearning	2.951
9	25	somatosensory-abrupt	relearning	5.7
11	25	somatosensory-abrupt	relearning	5.118
12	25	somatosensory-abrupt	relearning	-2.453
13	25	somatosensory-abrupt	relearning	6.372
14	25	somatosensory-abrupt	relearning	-3.454
15	25	somatosensory-abrupt	relearning	2.693
16	25	somatosensory-abrupt	relearning	-5.636
17	25	somatosensory-abrupt	relearning	0.21
18	25	somatosensory-abrupt	relearning	4.762
19	25	somatosensory-abrupt	relearning	-1.695
20	25	somatosensory-abrupt	relearning	-5.854
21	25	somatosensory-abrupt	relearning	3.441
22	25	somatosensory-abrupt	relearning	6.432
23	25	somatosensory-abrupt	relearning	0.348
24	25	somatosensory-abrupt	relearning	-9.7
25	25	somatosensory-abrupt	relearning	-0.45
26	25	somatosensory-abrupt	relearning	1.672
27	25	somatosensory-abrupt	relearning	-2.692
28	25	somatosensory-abrupt	relearning	-0.526
29	25	somatosensory-abrupt	relearning	3.716
30	25	somatosensory-abrupt	relearning	1.32
31	25	somatosensory-abrupt	relearning	2.264
32	25	somatosensory-abrupt	relearning	-4.803
33	25	somatosensory-abrupt	relearning	2.77
34	25	somatosensory-abrupt	relearning	-1.692
35	25	somatosensory-abrupt	relearning	3.177
36	25	somatosensory-abrupt	relearning	2.429
37	25	somatosensory-abrupt	relearning	-3.053
38	25	somatosensory-abrupt	relearning	4.033
39	25	somatosensory-abrupt	relearning	1.473
40	25	somatosensory-abrupt	relearning	0.9
41	25	somatosensory-abrupt	relearning	0.475
42	25	somatosensory-abrupt	relearning	0.432
43	25	somatosensory-abrupt	relearning	-1.246
44	25	somatosensory-abrupt	relearning	-0.636
45	25	somatosensory-abrupt	relearning	3.737
46	25	somatosensory-abrupt	relearning	6.479
47	25	somatosensory-abrupt	relearning	-0.42
48	25	somatosensory-abrupt	relearning	0.669
49	25	somatosensory-abrupt	relearning	1.243
50	25	somatosensory-abrupt	relearning	4.318
51	25	somatosensory-abrupt	relearning	-3.288
52	25	somatosensory-abrupt	relearning	1.031
53	25	somatosensory-abrupt	relearning	-0.434
54	25	somatosensory-abrupt	relearning	-0.002
56	25	somatosensory-abrupt	relearning	2.414
57	25	somatosensory-abrupt	relearning	3.97
58	25	somatosensory-abrupt	relearning	1.703
59	25	somatosensory-abrupt	relearning	0.776
60	25	somatosensory-abrupt	relearning	3.202
61	25	somatosensory-abrupt	relearning	6.607
62	25	somatosensory-abrupt	relearning	0.667
63	25	somatosensory-abrupt	relearning	2.684
64	25	somatosensory-abrupt	relearning	3.839
65	25	somatosensory-abrupt	relearning	4.131
66	25	somatosensory-abrupt	relearning	2.191
67	25	somatosensory-abrupt	relearning	1.188
68	25	somatosensory-abrupt	relearning	-0.278
69	25	somatosensory-abrupt	relearning	5.217
70	25	somatosensory-abrupt	relearning	1.489
71	25	somatosensory-abrupt	relearning	-1.296
72	25	somatosensory-abrupt	relearning	8.618
73	25	somatosensory-abrupt	relearning	5.598
74	25	somatosensory-abrupt	relearning	-1.572
75	25	somatosensory-abrupt	relearning	6.982
76	25	somatosensory-abrupt	relearning	0.296
77	25	somatosensory-abrupt	relearning	4.532
78	25	somatosensory-abrupt	relearning	-0.236
79	25	somatosensory-abrupt	relearning	-4.197
80	25	somatosensory-abrupt	relearning	1.877
81	25	somatosensory-abrupt	relearning	-0.815
82	25	somatosensory-abrupt	relearning	4.812
83	25	somatosensory-abrupt	relearning	2.708
84	25	somatosensory-abrupt	relearning	1.293
86	25	somatosensory-abrupt	relearning	5.373
87	25	somatosensory-abrupt	relearning	5.073
88	25	somatosensory-abrupt	relearning	7.894
89	25	somatosensory-abrupt	relearning	-0.013
90	25	somatosensory-abrupt	relearning	2.749
91	25	somatosensory-abrupt	relearning	0.046
92	25	somatosensory-abrupt	relearning	2.234
93	25	somatosensory-abrupt	relearning	7.049
94	25	somatosensory-abrupt	relearning	-5.472
95	25	somatosensory-abrupt	relearning	5.125
96	25	somatosensory-abrupt	relearning	4.369
97	25	somatosensory-abrupt	relearning	3.428
98	25	somatosensory-abrupt	relearning	0.813
99	25	somatosensory-abrupt	relearning	8.048
100	25	somatosensory-abrupt	relearning	6.115
101	25	somatosensory-abrupt	relearning	2.149
102	25	somatosensory-abrupt	relearning	4.035
103	25	somatosensory-abrupt	relearning	3.61
104	25	somatosensory-abrupt	relearning	3.39
105	25	somatosensory-abrupt	relearning	-0.209
106	25	somatosensory-abrupt	relearning	2.631
107	25	somatosensory-abrupt	relearning	-1.793
108	25	somatosensory-abrupt	relearning	3.052
109	25	somatosensory-abrupt	relearning	1.875
110	25	somatosensory-abrupt	relearning	1.425
111	25	somatosensory-abrupt	relearning	-0.604
112	25	somatosensory-abrupt	relearning	-0.471
113	25	somatosensory-abrupt	relearning	1.298
114	25	somatosensory-abrupt	relearning	4.913
116	25	somatosensory-abrupt	relearning	7.006
117	25	somatosensory-abrupt	relearning	6.871
118	25	somatosensory-abrupt	relearning	5.93
119	25	somatosensory-abrupt	relearning	4.772
120	25	somatosensory-abrupt	relearning	0.718
121	25	somatosensory-abrupt	relearning	5.341
122	25	somatosensory-abrupt	relearning	0.171
123	25	somatosensory-abrupt	relearning	5.208
124	25	somatosensory-abrupt	relearning	0.717
125	25	somatosensory-abrupt	relearning	-0.789
126	25	somatosensory-abrupt	relearning	-2.13
127	25	somatosensory-abrupt	relearning	3.801
128	25	somatosensory-abrupt	relearning	2.305
129	25	somatosensory-abrupt	relearning	3.452
130	25	somatosensory-abrupt	relearning	6.172
131	25	somatosensory-abrupt	relearning	6.331
132	25	somatosensory-abrupt	relearning	-4.176
133	25	somatosensory-abrupt	relearning	8.459
134	25	somatosensory-abrupt	relearning	1.929
135	25	somatosensory-abrupt	relearning	2.933
136	25	somatosensory-abrupt	relearning	0.498
137	25	somatosensory-abrupt	relearning	2.793
138	25	somatosensory-abrupt	relearning	0.719
139	25	somatosensory-abrupt	relearning	4.648
140	25	somatosensory-abrupt	relearning	-0.149
141	25	somatosensory-abrupt	relearning	3.207
142	25	somatosensory-abrupt	relearning	1.89
143	25	somatosensory-abrupt	relearning	1.217
144	25	somatosensory-abrupt	relearning	3.659
146	25	somatosensory-abrupt	relearning	3.848
147	25	somatosensory-abrupt	relearning	-2.364
148	25	somatosensory-abrupt	relearning	5.573
149	25	somatosensory-abrupt	relearning	0.638
151	25	somatosensory-abrupt	relearning	6.674
152	25	somatosensory-abrupt	relearning	0.857
153	25	somatosensory-abrupt	relearning	-1.741
154	25	somatosensory-abrupt	relearning	2.429
155	25	somatosensory-abrupt	relearning	-10.345
6	23	somatosensory-abrupt	relearning	14.431
7	23	somatosensory-abrupt	relearning	-0.093
8	23	somatosensory-abrupt	relearning	3.828
9	23	somatosensory-abrupt	relearning	-6.784
11	23	somatosensory-abrupt	relearning	8.226
12	23	somatosensory-abrupt	relearning	-2.036
13	23	somatosensory-abrupt	relearning	-1.439
14	23	somatosensory-abrupt	relearning	-1.767
15	23	somatosensory-abrupt	relearning	-4.495
16	23	somatosensory-abrupt	relearning	14.53
17	23	somatosensory-abrupt	relearning	4.315
18	23	somatosensory-abrupt	relearning	5.34
19	23	somatosensory-abrupt	relearning	3.455
20	23	somatosensory-abrupt	relearning	-2.374
21	23	somatosensory-abrupt	relearning	5.758
22	23	somatosensory-abrupt	relearning	-0.262
23	23	somatosensory-abrupt	relearning	-0.531
24	23	somatosensory-abrupt	relearning	-0.43
25	23	somatosensory-abrupt	relearning	4.388
26	23	somatosensory-abrupt	relearning	1.445
27	23	somatosensory-abrupt	relearning	-5.962
28	23	somatosensory-abrupt	relearning	4.134
29	23	somatosensory-abrupt	relearning	2.038
30	23	somatosensory-abrupt	relearning	3.97
31	23	somatosensory-abrupt	relearning	1.754
32	23	somatosensory-abrupt	relearning	4.707
33	23	somatosensory-abrupt	relearning	-3.456
34	23	somatosensory-abrupt	relearning	-2.569
35	23	somatosensory-abrupt	relearning	-1.562
36	23	somatosensory-abrupt	relearning	-1.855
37	23	somatosensory-abrupt	relearning	-6.054
38	23	somatosensory-abrupt	relearning	4
39	23	somatosensory-abrupt	relearning	1.636
40	23	somatosensory-abrupt	relearning	-1.289
41	23	somatosensory-abrupt	relearning	-5.888
42	23	somatosensory-abrupt	relearning	-5.099
43	23	somatosensory-abrupt	relearning	-7.472
44	23	somatosensory-abrupt	relearning	-0.898
45	23	somatosensory-abrupt	relearning	-1.75
46	23	somatosensory-abrupt	relearning	3.438
47	23	somatosensory-abrupt	relearning	1.797
48	23	somatosensory-abrupt	relearning	-5.683
49	23	somatosensory-abrupt	relearning	1.911
50	23	somatosensory-abrupt	relearning	-2.821
51	23	somatosensory-abrupt	relearning	-0.783
52	23	somatosensory-abrupt	relearning	0.682
53	23	somatosensory-abrupt	relearning	-5.939
54	23	somatosensory-abrupt	relearning	0.019
56	23	somatosensory-abrupt	relearning	-3.966
57	23	somatosensory-abrupt	relearning	2.91
58	23	somatosensory-abrupt	relearning	-6.17
59	23	somatosensory-abrupt	relearning	-6.451
60	23	somatosensory-abrupt	relearning	0.247
61	23	somatosensory-abrupt	relearning	-2.463
62	23	somatosensory-abrupt	relearning	1.335
63	23	somatosensory-abrupt	relearning	-2.309
64	23	somatosensory-abrupt	relearning	0.536
65	23	somatosensory-abrupt	relearning	-1.99
66	23	somatosensory-abrupt	relearning	-7.271
67	23	somatosensory-abrupt	relearning	-3.496
68	23	somatosensory-abrupt	relearning	-1.312
69	23	somatosensory-abrupt	relearning	-3.53
70	23	somatosensory-abrupt	relearning	-2.741
71	23	somatosensory-abrupt	relearning	0.809
72	23	somatosensory-abrupt	relearning	-4.297
73	23	somatosensory-abrupt	relearning	-0.603
74	23	somatosensory-abrupt	relearning	-6.275
75	23	somatosensory-abrupt	relearning	-3.795
76	23	somatosensory-abrupt	relearning	-7.975
77	23	somatosensory-abrupt	relearning	-3.35
78	23	somatosensory-abrupt	relearning	-0.602
79	23	somatosensory-abrupt	relearning	-2.594
80	23	somatosensory-abrupt	relearning	-5.378
81	23	somatosensory-abrupt	relearning	1.55
82	23	somatosensory-abrupt	relearning	-1.525
83	23	somatosensory-abrupt	relearning	-4.463
84	23	somatosensory-abrupt	relearning	-1.213
86	23	somatosensory-abrupt	relearning	-4.486
87	23	somatosensory-abrupt	relearning	4.297
88	23	somatosensory-abrupt	relearning	1.221
89	23	somatosensory-abrupt	relearning	3.662
90	23	somatosensory-abrupt	relearning	-9.218
91	23	somatosensory-abrupt	relearning	-3.622
92	23	somatosensory-abrupt	relearning	-3.877
93	23	somatosensory-abrupt	relearning	-6.353
94	23	somatosensory-abrupt	relearning	-1.327
95	23	somatosensory-abrupt	relearning	0.489
96	23	somatosensory-abrupt	relearning	0.354
97	23	somatosensory-abrupt	relearning	-0.537
98	23	somatosensory-abrupt	relearning	-7.327
99	23	somatosensory-abrupt	relearning	1.973
100	23	somatosensory-abrupt	relearning	-5.001
101	23	somatosensory-abrupt	relearning	2.07
102	23	somatosensory-abrupt	relearning	-2.883
103	23	somatosensory-abrupt	relearning	1.053
104	23	somatosensory-abrupt	relearning	-0.462
105	23	somatosensory-abrupt	relearning	-3.375
106	23	somatosensory-abrupt	relearning	-4.619
107	23	somatosensory-abrupt	relearning	0.173
108	23	somatosensory-abrupt	relearning	-3.879
109	23	somatosensory-abrupt	relearning	-3.118
110	23	somatosensory-abrupt	relearning	-2.307
111	23	somatosensory-abrupt	relearning	-5.111
112	23	somatosensory-abrupt	relearning	3.261
113	23	somatosensory-abrupt	relearning	-0.372
114	23	somatosensory-abrupt	relearning	2.257
116	23	somatosensory-abrupt	relearning	1.889
117	23	somatosensory-abrupt	relearning	-4.322
118	23	somatosensory-abrupt	relearning	4.748
119	23	somatosensory-abrupt	relearning	-4.868
120	23	somatosensory-abrupt	relearning	-5.003
121	23	somatosensory-abrupt	relearning	0.293
122	23	somatosensory-abrupt	relearning	-1.421
123	23	somatosensory-abrupt	relearning	-8.075
124	23	somatosensory-abrupt	relearning	-0.356
125	23	somatosensory-abrupt	relearning	0.087
126	23	somatosensory-abrupt	relearning	2.416
127	23	somatosensory-abrupt	relearning	0.685
128	23	somatosensory-abrupt	relearning	0.548
129	23	somatosensory-abrupt	relearning	1.384
130	23	somatosensory-abrupt	relearning	1.251
131	23	somatosensory-abrupt	relearning	-2.429
132	23	somatosensory-abrupt	relearning	0.157
133	23	somatosensory-abrupt	relearning	2.145
134	23	somatosensory-abrupt	relearning	1.279
135	23	somatosensory-abrupt	relearning	4.44
136	23	somatosensory-abrupt	relearning	-4.739
137	23	somatosensory-abrupt	relearning	1.19
138	23	somatosensory-abrupt	relearning	5.037
139	23	somatosensory-abrupt	relearning	-3.073
140	23	somatosensory-abrupt	relearning	3.124
141	23	somatosensory-abrupt	relearning	0.177
142	23	somatosensory-abrupt	relearning	-5.114
143	23	somatosensory-abrupt	relearning	0.268
144	23	somatosensory-abrupt	relearning	-4.453
146	23	somatosensory-abrupt	relearning	2.608
147	23	somatosensory-abrupt	relearning	-3.261
148	23	somatosensory-abrupt	relearning	-3.659
149	23	somatosensory-abrupt	relearning	2.765
151	23	somatosensory-abrupt	relearning	2.207
152	23	somatosensory-abrupt	relearning	-3.867
153	23	somatosensory-abrupt	relearning	-3.033
154	23	somatosensory-abrupt	relearning	1.384
155	23	somatosensory-abrupt	relearning	2.506
6	26	somatosensory-abrupt	relearning	18.381
7	26	somatosensory-abrupt	relearning	7.42
8	26	somatosensory-abrupt	relearning	0.717
9	26	somatosensory-abrupt	relearning	4.841
11	26	somatosensory-abrupt	relearning	3.97
12	26	somatosensory-abrupt	relearning	5.005
13	26	somatosensory-abrupt	relearning	6.427
14	26	somatosensory-abrupt	relearning	-1.534
15	26	somatosensory-abrupt	relearning	0.892
16	26	somatosensory-abrupt	relearning	-0.311
17	26	somatosensory-abrupt	relearning	0.662
18	26	somatosensory-abrupt	relearning	1.996
19	26	somatosensory-abrupt	relearning	2.719
20	26	somatosensory-abrupt	relearning	0.811
21	26	somatosensory-abrupt	relearning	2.61
22	26	somatosensory-abrupt	relearning	4.916
23	26	somatosensory-abrupt	relearning	0.989
24	26	somatosensory-abrupt	relearning	-3.111
25	26	somatosensory-abrupt	relearning	3.949
26	26	somatosensory-abrupt	relearning	-4.471
27	26	somatosensory-abrupt	relearning	2.052
28	26	somatosensory-abrupt	relearning	-3.134
29	26	somatosensory-abrupt	relearning	-5.195
30	26	somatosensory-abrupt	relearning	-0.875
31	26	somatosensory-abrupt	relearning	1.928
32	26	somatosensory-abrupt	relearning	-2.242
33	26	somatosensory-abrupt	relearning	-1.127
34	26	somatosensory-abrupt	relearning	0.896
35	26	somatosensory-abrupt	relearning	0.594
36	26	somatosensory-abrupt	relearning	4.986
37	26	somatosensory-abrupt	relearning	1.066
38	26	somatosensory-abrupt	relearning	-0.341
39	26	somatosensory-abrupt	relearning	-4.616
40	26	somatosensory-abrupt	relearning	5.981
41	26	somatosensory-abrupt	relearning	-2.081
42	26	somatosensory-abrupt	relearning	-0.341
43	26	somatosensory-abrupt	relearning	1.139
44	26	somatosensory-abrupt	relearning	1.097
45	26	somatosensory-abrupt	relearning	-5.883
46	26	somatosensory-abrupt	relearning	-1.122
47	26	somatosensory-abrupt	relearning	-0.915
48	26	somatosensory-abrupt	relearning	2.011
49	26	somatosensory-abrupt	relearning	3.119
50	26	somatosensory-abrupt	relearning	3.602
51	26	somatosensory-abrupt	relearning	0.299
52	26	somatosensory-abrupt	relearning	2.588
53	26	somatosensory-abrupt	relearning	2.179
54	26	somatosensory-abrupt	relearning	2.549
56	26	somatosensory-abrupt	relearning	6.524
57	26	somatosensory-abrupt	relearning	0.883
58	26	somatosensory-abrupt	relearning	-0.939
59	26	somatosensory-abrupt	relearning	1.195
60	26	somatosensory-abrupt	relearning	0.913
61	26	somatosensory-abrupt	relearning	2.736
62	26	somatosensory-abrupt	relearning	-0.166
63	26	somatosensory-abrupt	relearning	0.245
64	26	somatosensory-abrupt	relearning	0.71
65	26	somatosensory-abrupt	relearning	6.116
66	26	somatosensory-abrupt	relearning	-0.315
67	26	somatosensory-abrupt	relearning	2.863
68	26	somatosensory-abrupt	relearning	-1.797
69	26	somatosensory-abrupt	relearning	0.026
70	26	somatosensory-abrupt	relearning	1.104
71	26	somatosensory-abrupt	relearning	-5.447
72	26	somatosensory-abrupt	relearning	1.971
73	26	somatosensory-abrupt	relearning	5.247
74	26	somatosensory-abrupt	relearning	-0.212
75	26	somatosensory-abrupt	relearning	2.477
76	26	somatosensory-abrupt	relearning	-2.299
77	26	somatosensory-abrupt	relearning	4.843
78	26	somatosensory-abrupt	relearning	3.879
79	26	somatosensory-abrupt	relearning	1.715
80	26	somatosensory-abrupt	relearning	0.025
81	26	somatosensory-abrupt	relearning	6.148
82	26	somatosensory-abrupt	relearning	6.473
83	26	somatosensory-abrupt	relearning	-0.344
84	26	somatosensory-abrupt	relearning	-3.355
86	26	somatosensory-abrupt	relearning	1.455
87	26	somatosensory-abrupt	relearning	-4.663
88	26	somatosensory-abrupt	relearning	-0.011
89	26	somatosensory-abrupt	relearning	-1.861
90	26	somatosensory-abrupt	relearning	5.52
91	26	somatosensory-abrupt	relearning	-0.339
92	26	somatosensory-abrupt	relearning	9.085
93	26	somatosensory-abrupt	relearning	-1.012
94	26	somatosensory-abrupt	relearning	-2.832
95	26	somatosensory-abrupt	relearning	-2.906
96	26	somatosensory-abrupt	relearning	-0.601
97	26	somatosensory-abrupt	relearning	-1.596
98	26	somatosensory-abrupt	relearning	1.298
99	26	somatosensory-abrupt	relearning	-1.684
100	26	somatosensory-abrupt	relearning	-1.442
101	26	somatosensory-abrupt	relearning	2.313
102	26	somatosensory-abrupt	relearning	3.946
103	26	somatosensory-abrupt	relearning	5.975
104	26	somatosensory-abrupt	relearning	7.169
105	26	somatosensory-abrupt	relearning	2.934
106	26	somatosensory-abrupt	relearning	0.879
107	26	somatosensory-abrupt	relearning	1.302
108	26	somatosensory-abrupt	relearning	5.906
109	26	somatosensory-abrupt	relearning	8.584
110	26	somatosensory-abrupt	relearning	3.442
111	26	somatosensory-abrupt	relearning	5.727
112	26	somatosensory-abrupt	relearning	-4.951
113	26	somatosensory-abrupt	relearning	0.59
114	26	somatosensory-abrupt	relearning	0.471
116	26	somatosensory-abrupt	relearning	4.094
117	26	somatosensory-abrupt	relearning	2.581
118	26	somatosensory-abrupt	relearning	-1.092
119	26	somatosensory-abrupt	relearning	-2.31
120	26	somatosensory-abrupt	relearning	-0.568
121	26	somatosensory-abrupt	relearning	-0.142
122	26	somatosensory-abrupt	relearning	-0.93
123	26	somatosensory-abrupt	relearning	5.332
124	26	somatosensory-abrupt	relearning	1.746
125	26	somatosensory-abrupt	relearning	1.663
126	26	somatosensory-abrupt	relearning	-4.616
127	26	somatosensory-abrupt	relearning	8.495
128	26	somatosensory-abrupt	relearning	2.931
129	26	somatosensory-abrupt	relearning	-6.652
130	26	somatosensory-abrupt	relearning	-0.308
131	26	somatosensory-abrupt	relearning	-2.757
132	26	somatosensory-abrupt	relearning	-3.755
133	26	somatosensory-abrupt	relearning	3.381
134	26	somatosensory-abrupt	relearning	2.292
135	26	somatosensory-abrupt	relearning	4.578
136	26	somatosensory-abrupt	relearning	2.219
137	26	somatosensory-abrupt	relearning	-2.073
138	26	somatosensory-abrupt	relearning	7.111
139	26	somatosensory-abrupt	relearning	1.528
140	26	somatosensory-abrupt	relearning	0.718
141	26	somatosensory-abrupt	relearning	4.898
142	26	somatosensory-abrupt	relearning	0.167
143	26	somatosensory-abrupt	relearning	-1.806
144	26	somatosensory-abrupt	relearning	5.46
146	26	somatosensory-abrupt	relearning	3.477
147	26	somatosensory-abrupt	relearning	-1.143
148	26	somatosensory-abrupt	relearning	3.286
149	26	somatosensory-abrupt	relearning	-2.639
151	26	somatosensory-abrupt	relearning	5.914
152	26	somatosensory-abrupt	relearning	-1.418
153	26	somatosensory-abrupt	relearning	3.433
154	26	somatosensory-abrupt	relearning	-0.911
155	26	somatosensory-abrupt	relearning	4.541
6	30	somatosensory-abrupt	relearning	15.298
7	30	somatosensory-abrupt	relearning	1.759
8	30	somatosensory-abrupt	relearning	9.972
9	30	somatosensory-abrupt	relearning	-1.346
11	30	somatosensory-abrupt	relearning	2.073
12	30	somatosensory-abrupt	relearning	1.311
13	30	somatosensory-abrupt	relearning	1.676
14	30	somatosensory-abrupt	relearning	-2.062
15	30	somatosensory-abrupt	relearning	1.752
16	30	somatosensory-abrupt	relearning	5.664
17	30	somatosensory-abrupt	relearning	-4.65
18	30	somatosensory-abrupt	relearning	8.83
19	30	somatosensory-abrupt	relearning	-1.756
20	30	somatosensory-abrupt	relearning	0.633
21	30	somatosensory-abrupt	relearning	2.376
22	30	somatosensory-abrupt	relearning	2.722
23	30	somatosensory-abrupt	relearning	0.758
24	30	somatosensory-abrupt	relearning	2.469
25	30	somatosensory-abrupt	relearning	2.83
26	30	somatosensory-abrupt	relearning	-2.419
27	30	somatosensory-abrupt	relearning	4.097
28	30	somatosensory-abrupt	relearning	8.636
29	30	somatosensory-abrupt	relearning	-1.625
30	30	somatosensory-abrupt	relearning	3.3
31	30	somatosensory-abrupt	relearning	0.407
32	30	somatosensory-abrupt	relearning	6.004
33	30	somatosensory-abrupt	relearning	-0.002
34	30	somatosensory-abrupt	relearning	-0.714
35	30	somatosensory-abrupt	relearning	-4.269
36	30	somatosensory-abrupt	relearning	-0.973
37	30	somatosensory-abrupt	relearning	0.78
38	30	somatosensory-abrupt	relearning	0.933
39	30	somatosensory-abrupt	relearning	-6.67
40	30	somatosensory-abrupt	relearning	11.139
41	30	somatosensory-abrupt	relearning	5.68
42	30	somatosensory-abrupt	relearning	0.991
43	30	somatosensory-abrupt	relearning	0.752
44	30	somatosensory-abrupt	relearning	1.917
45	30	somatosensory-abrupt	relearning	4.393
46	30	somatosensory-abrupt	relearning	0.405
47	30	somatosensory-abrupt	relearning	-1.736
48	30	somatosensory-abrupt	relearning	4.131
49	30	somatosensory-abrupt	relearning	1.426
50	30	somatosensory-abrupt	relearning	-0.754
51	30	somatosensory-abrupt	relearning	-1.366
52	30	somatosensory-abrupt	relearning	-1.012
53	30	somatosensory-abrupt	relearning	8.235
54	30	somatosensory-abrupt	relearning	-1.459
56	30	somatosensory-abrupt	relearning	6.851
57	30	somatosensory-abrupt	relearning	1.732
58	30	somatosensory-abrupt	relearning	-0.171
59	30	somatosensory-abrupt	relearning	-3.62
60	30	somatosensory-abrupt	relearning	1.963
61	30	somatosensory-abrupt	relearning	-0.463
62	30	somatosensory-abrupt	relearning	2.263
63	30	somatosensory-abrupt	relearning	-2.238
64	30	somatosensory-abrupt	relearning	4.049
65	30	somatosensory-abrupt	relearning	2.004
66	30	somatosensory-abrupt	relearning	-1.309
67	30	somatosensory-abrupt	relearning	1.651
68	30	somatosensory-abrupt	relearning	4.74
69	30	somatosensory-abrupt	relearning	3.277
70	30	somatosensory-abrupt	relearning	5.721
71	30	somatosensory-abrupt	relearning	-2.585
72	30	somatosensory-abrupt	relearning	1.203
73	30	somatosensory-abrupt	relearning	3.075
74	30	somatosensory-abrupt	relearning	-2.152
75	30	somatosensory-abrupt	relearning	1.184
76	30	somatosensory-abrupt	relearning	-0.559
77	30	somatosensory-abrupt	relearning	3.014
78	30	somatosensory-abrupt	relearning	4.64
79	30	somatosensory-abrupt	relearning	-6.076
80	30	somatosensory-abrupt	relearning	3.894
81	30	somatosensory-abrupt	relearning	2.679
82	30	somatosensory-abrupt	relearning	4.336
83	30	somatosensory-abrupt	relearning	4.374
84	30	somatosensory-abrupt	relearning	-1.358
86	30	somatosensory-abrupt	relearning	10.034
87	30	somatosensory-abrupt	relearning	-0.739
88	30	somatosensory-abrupt	relearning	0.361
89	30	somatosensory-abrupt	relearning	-1.039
90	30	somatosensory-abrupt	relearning	4.541
91	30	somatosensory-abrupt	relearning	8.811
92	30	somatosensory-abrupt	relearning	-9.295
93	30	somatosensory-abrupt	relearning	1.878
94	30	somatosensory-abrupt	relearning	1.507
95	30	somatosensory-abrupt	relearning	-2.253
96	30	somatosensory-abrupt	relearning	2.5
97	30	somatosensory-abrupt	relearning	0.611
98	30	somatosensory-abrupt	relearning	-6.699
99	30	somatosensory-abrupt	relearning	5.543
100	30	somatosensory-abrupt	relearning	4.69
101	30	somatosensory-abrupt	relearning	6.761
102	30	somatosensory-abrupt	relearning	2.818
103	30	somatosensory-abrupt	relearning	4.02
104	30	somatosensory-abrupt	relearning	-4.355
105	30	somatosensory-abrupt	relearning	3.317
106	30	somatosensory-abrupt	relearning	6.33
107	30	somatosensory-abrupt	relearning	-0.882
108	30	somatosensory-abrupt	relearning	-3.387
109	30	somatosensory-abrupt	relearning	0.924
110	30	somatosensory-abrupt	relearning	0.783
111	30	somatosensory-abrupt	relearning	4.498
112	30	somatosensory-abrupt	relearning	2.589
113	30	somatosensory-abrupt	relearning	3.005
114	30	somatosensory-abrupt	relearning	-5.938
116	30	somatosensory-abrupt	relearning	4.441
117	30	somatosensory-abrupt	relearning	-1.249
118	30	somatosensory-abrupt	relearning	-0.057
119	30	somatosensory-abrupt	relearning	0.613
120	30	somatosensory-abrupt	relearning	-0.737
121	30	somatosensory-abrupt	relearning	0.298
122	30	somatosensory-abrupt	relearning	1.316
123	30	somatosensory-abrupt	relearning	0.066
124	30	somatosensory-abrupt	relearning	2.875
125	30	somatosensory-abrupt	relearning	-3.45
126	30	somatosensory-abrupt	relearning	4.159
127	30	somatosensory-abrupt	relearning	1.095
128	30	somatosensory-abrupt	relearning	-4.095
129	30	somatosensory-abrupt	relearning	4.539
130	30	somatosensory-abrupt	relearning	-6.813
131	30	somatosensory-abrupt	relearning	-0.671
132	30	somatosensory-abrupt	relearning	-4.594
133	30	somatosensory-abrupt	relearning	-1.928
134	30	somatosensory-abrupt	relearning	-1.385
135	30	somatosensory-abrupt	relearning	-2.232
136	30	somatosensory-abrupt	relearning	1.696
137	30	somatosensory-abrupt	relearning	-0.735
138	30	somatosensory-abrupt	relearning	2.634
139	30	somatosensory-abrupt	relearning	2.809
140	30	somatosensory-abrupt	relearning	-0.812
141	30	somatosensory-abrupt	relearning	2.247
142	30	somatosensory-abrupt	relearning	-3.284
143	30	somatosensory-abrupt	relearning	-2.45
144	30	somatosensory-abrupt	relearning	-0.788
146	30	somatosensory-abrupt	relearning	-7.189
147	30	somatosensory-abrupt	relearning	1.062
148	30	somatosensory-abrupt	relearning	-0.47
149	30	somatosensory-abrupt	relearning	1.636
151	30	somatosensory-abrupt	relearning	-3.613
152	30	somatosensory-abrupt	relearning	-0.711
153	30	somatosensory-abrupt	relearning	4.182
154	30	somatosensory-abrupt	relearning	1.356
155	30	somatosensory-abrupt	relearning	-3.64
6	31	sham-abrupt	relearning	-0.331
7	31	sham-abrupt	relearning	-1.141
8	31	sham-abrupt	relearning	-7.48
9	31	sham-abrupt	relearning	-7.203
11	31	sham-abrupt	relearning	4.742
12	31	sham-abrupt	relearning	-9.651
13	31	sham-abrupt	relearning	-7.728
14	31	sham-abrupt	relearning	-9.485
15	31	sham-abrupt	relearning	4.163
16	31	sham-abrupt	relearning	-0.54
17	31	sham-abrupt	relearning	-3.617
18	31	sham-abrupt	relearning	2.442
19	31	sham-abrupt	relearning	4.429
20	31	sham-abrupt	relearning	0.537
21	31	sham-abrupt	relearning	3.476
22	31	sham-abrupt	relearning	6.631
23	31	sham-abrupt	relearning	4.047
24	31	sham-abrupt	relearning	-11.237
25	31	sham-abrupt	relearning	2
26	31	sham-abrupt	relearning	-2.224
27	31	sham-abrupt	relearning	-3.042
28	31	sham-abrupt	relearning	-2.435
29	31	sham-abrupt	relearning	-1.218
30	31	sham-abrupt	relearning	-0.426
31	31	sham-abrupt	relearning	2.21
32	31	sham-abrupt	relearning	-13.14
33	31	sham-abrupt	relearning	1.644
34	31	sham-abrupt	relearning	-7.871
35	31	sham-abrupt	relearning	1.967
36	31	sham-abrupt	relearning	-7.374
37	31	sham-abrupt	relearning	-3.199
38	31	sham-abrupt	relearning	-6.504
39	31	sham-abrupt	relearning	-2.467
40	31	sham-abrupt	relearning	-5.762
41	31	sham-abrupt	relearning	-0.44
42	31	sham-abrupt	relearning	-9.493
43	31	sham-abrupt	relearning	2.561
44	31	sham-abrupt	relearning	-9.761
45	31	sham-abrupt	relearning	-4.209
46	31	sham-abrupt	relearning	6.06
47	31	sham-abrupt	relearning	-4.179
48	31	sham-abrupt	relearning	2.153
49	31	sham-abrupt	relearning	-6.95
50	31	sham-abrupt	relearning	3.911
51	31	sham-abrupt	relearning	-1.308
52	31	sham-abrupt	relearning	-1.652
53	31	sham-abrupt	relearning	5.543
54	31	sham-abrupt	relearning	-2.746
56	31	sham-abrupt	relearning	6.136
57	31	sham-abrupt	relearning	0.51
58	31	sham-abrupt	relearning	-11.126
59	31	sham-abrupt	relearning	-7.658
60	31	sham-abrupt	relearning	-0.4
61	31	sham-abrupt	relearning	1.633
62	31	sham-abrupt	relearning	0.685
63	31	sham-abrupt	relearning	-0.857
64	31	sham-abrupt	relearning	-1.441
65	31	sham-abrupt	relearning	1.314
66	31	sham-abrupt	relearning	-13.54
67	31	sham-abrupt	relearning	4.489
68	31	sham-abrupt	relearning	-8.843
69	31	sham-abrupt	relearning	10.081
70	31	sham-abrupt	relearning	-4.583
71	31	sham-abrupt	relearning	1.508
72	31	sham-abrupt	relearning	0.573
73	31	sham-abrupt	relearning	-6.992
74	31	sham-abrupt	relearning	-8.266
75	31	sham-abrupt	relearning	2.836
76	31	sham-abrupt	relearning	-2.139
77	31	sham-abrupt	relearning	-2.308
78	31	sham-abrupt	relearning	-8.345
79	31	sham-abrupt	relearning	0.084
80	31	sham-abrupt	relearning	-2.761
81	31	sham-abrupt	relearning	-8.715
82	31	sham-abrupt	relearning	-5.249
83	31	sham-abrupt	relearning	-6.534
84	31	sham-abrupt	relearning	-8.153
86	31	sham-abrupt	relearning	0.102
87	31	sham-abrupt	relearning	-4.543
88	31	sham-abrupt	relearning	1.938
89	31	sham-abrupt	relearning	9.015
90	31	sham-abrupt	relearning	4.116
91	31	sham-abrupt	relearning	-10.556
92	31	sham-abrupt	relearning	-5.601
93	31	sham-abrupt	relearning	-10.217
94	31	sham-abrupt	relearning	-5.557
95	31	sham-abrupt	relearning	-4.574
96	31	sham-abrupt	relearning	-9.229
97	31	sham-abrupt	relearning	-12.148
98	31	sham-abrupt	relearning	-0.524
99	31	sham-abrupt	relearning	-2.282
100	31	sham-abrupt	relearning	-6.695
101	31	sham-abrupt	relearning	-3.481
102	31	sham-abrupt	relearning	-8.018
103	31	sham-abrupt	relearning	-1.661
104	31	sham-abrupt	relearning	-4.271
105	31	sham-abrupt	relearning	-1.393
106	31	sham-abrupt	relearning	2.608
107	31	sham-abrupt	relearning	5.242
108	31	sham-abrupt	relearning	-5.055
109	31	sham-abrupt	relearning	-10.924
110	31	sham-abrupt	relearning	-8.496
111	31	sham-abrupt	relearning	-4.296
112	31	sham-abrupt	relearning	-5.431
113	31	sham-abrupt	relearning	-1.161
114	31	sham-abrupt	relearning	0.002
116	31	sham-abrupt	relearning	-5.898
117	31	sham-abrupt	relearning	-10.622
118	31	sham-abrupt	relearning	-6.402
119	31	sham-abrupt	relearning	-4.599
120	31	sham-abrupt	relearning	-8.75
121	31	sham-abrupt	relearning	-7.621
122	31	sham-abrupt	relearning	-11.351
123	31	sham-abrupt	relearning	-0.645
124	31	sham-abrupt	relearning	-3.006
125	31	sham-abrupt	relearning	-2.672
126	31	sham-abrupt	relearning	4.124
127	31	sham-abrupt	relearning	-6.204
128	31	sham-abrupt	relearning	0.502
129	31	sham-abrupt	relearning	2.036
130	31	sham-abrupt	relearning	-7.792
131	31	sham-abrupt	relearning	-4.621
132	31	sham-abrupt	relearning	-4.151
133	31	sham-abrupt	relearning	-6.351
134	31	sham-abrupt	relearning	-4.18
135	31	sham-abrupt	relearning	-2.304
136	31	sham-abrupt	relearning	-1.595
137	31	sham-abrupt	relearning	-2.044
138	31	sham-abrupt	relearning	1.18
139	31	sham-abrupt	relearning	1.524
140	31	sham-abrupt	relearning	-3.566
141	31	sham-abrupt	relearning	-1.862
142	31	sham-abrupt	relearning	-2.329
143	31	sham-abrupt	relearning	-5.546
144	31	sham-abrupt	relearning	2.483
146	31	sham-abrupt	relearning	-9.974
147	31	sham-abrupt	relearning	-2.447
148	31	sham-abrupt	relearning	-6.425
149	31	sham-abrupt	relearning	-12.89
151	31	sham-abrupt	relearning	-3.991
152	31	sham-abrupt	relearning	-6.14
153	31	sham-abrupt	relearning	-7.143
154	31	sham-abrupt	relearning	-5.32
155	31	sham-abrupt	relearning	0.251
6	32	somatosensory-abrupt	relearning	12.99
7	32	somatosensory-abrupt	relearning	-5.026
8	32	somatosensory-abrupt	relearning	2.249
9	32	somatosensory-abrupt	relearning	6.471
11	32	somatosensory-abrupt	relearning	-4.857
12	32	somatosensory-abrupt	relearning	1.214
13	32	somatosensory-abrupt	relearning	-3.503
14	32	somatosensory-abrupt	relearning	7.773
15	32	somatosensory-abrupt	relearning	2.665
16	32	somatosensory-abrupt	relearning	-1.256
17	32	somatosensory-abrupt	relearning	-0.143
18	32	somatosensory-abrupt	relearning	-2.795
19	32	somatosensory-abrupt	relearning	-8.258
20	32	somatosensory-abrupt	relearning	7.551
21	32	somatosensory-abrupt	relearning	-0.607
22	32	somatosensory-abrupt	relearning	4.652
23	32	somatosensory-abrupt	relearning	2.445
24	32	somatosensory-abrupt	relearning	-1.999
25	32	somatosensory-abrupt	relearning	-5.805
26	32	somatosensory-abrupt	relearning	0.659
27	32	somatosensory-abrupt	relearning	-2.945
28	32	somatosensory-abrupt	relearning	-0.006
29	32	somatosensory-abrupt	relearning	-4.551
30	32	somatosensory-abrupt	relearning	-2.293
31	32	somatosensory-abrupt	relearning	-3.73
32	32	somatosensory-abrupt	relearning	-5.157
33	32	somatosensory-abrupt	relearning	-8.081
34	32	somatosensory-abrupt	relearning	0.651
35	32	somatosensory-abrupt	relearning	1.168
36	32	somatosensory-abrupt	relearning	-1.725
37	32	somatosensory-abrupt	relearning	-2.795
38	32	somatosensory-abrupt	relearning	-2.21
39	32	somatosensory-abrupt	relearning	-2.741
40	32	somatosensory-abrupt	relearning	2.383
41	32	somatosensory-abrupt	relearning	4.682
42	32	somatosensory-abrupt	relearning	0.112
43	32	somatosensory-abrupt	relearning	0.437
44	32	somatosensory-abrupt	relearning	-3.894
45	32	somatosensory-abrupt	relearning	-3.157
46	32	somatosensory-abrupt	relearning	0.792
47	32	somatosensory-abrupt	relearning	3.046
48	32	somatosensory-abrupt	relearning	1.025
49	32	somatosensory-abrupt	relearning	1.711
50	32	somatosensory-abrupt	relearning	-9.038
51	32	somatosensory-abrupt	relearning	-2.124
52	32	somatosensory-abrupt	relearning	-1.808
53	32	somatosensory-abrupt	relearning	1.212
54	32	somatosensory-abrupt	relearning	-3.933
56	32	somatosensory-abrupt	relearning	2.792
57	32	somatosensory-abrupt	relearning	-2.67
58	32	somatosensory-abrupt	relearning	-1.786
59	32	somatosensory-abrupt	relearning	-1.236
60	32	somatosensory-abrupt	relearning	0.147
61	32	somatosensory-abrupt	relearning	4.981
62	32	somatosensory-abrupt	relearning	-1.548
63	32	somatosensory-abrupt	relearning	-5.409
64	32	somatosensory-abrupt	relearning	-3.902
65	32	somatosensory-abrupt	relearning	3.978
66	32	somatosensory-abrupt	relearning	-0.132
67	32	somatosensory-abrupt	relearning	-2.49
68	32	somatosensory-abrupt	relearning	-2.54
69	32	somatosensory-abrupt	relearning	0.545
70	32	somatosensory-abrupt	relearning	1.991
71	32	somatosensory-abrupt	relearning	-1.959
72	32	somatosensory-abrupt	relearning	-1.128
73	32	somatosensory-abrupt	relearning	-1.123
74	32	somatosensory-abrupt	relearning	-0.234
75	32	somatosensory-abrupt	relearning	-3.915
76	32	somatosensory-abrupt	relearning	-6.264
77	32	somatosensory-abrupt	relearning	-2.405
78	32	somatosensory-abrupt	relearning	-4.278
79	32	somatosensory-abrupt	relearning	-0.303
80	32	somatosensory-abrupt	relearning	1.076
81	32	somatosensory-abrupt	relearning	-5.684
82	32	somatosensory-abrupt	relearning	-0.65
83	32	somatosensory-abrupt	relearning	2.418
84	32	somatosensory-abrupt	relearning	-1.986
86	32	somatosensory-abrupt	relearning	-3.33
87	32	somatosensory-abrupt	relearning	-1.79
88	32	somatosensory-abrupt	relearning	-3.992
89	32	somatosensory-abrupt	relearning	-1.671
90	32	somatosensory-abrupt	relearning	-6.795
91	32	somatosensory-abrupt	relearning	0.737
92	32	somatosensory-abrupt	relearning	0.81
93	32	somatosensory-abrupt	relearning	1.762
94	32	somatosensory-abrupt	relearning	-4.782
95	32	somatosensory-abrupt	relearning	-7.317
96	32	somatosensory-abrupt	relearning	2.151
97	32	somatosensory-abrupt	relearning	-2.811
98	32	somatosensory-abrupt	relearning	-4.56
99	32	somatosensory-abrupt	relearning	4.195
100	32	somatosensory-abrupt	relearning	-4.15
101	32	somatosensory-abrupt	relearning	-0.831
102	32	somatosensory-abrupt	relearning	1.909
103	32	somatosensory-abrupt	relearning	-8.851
104	32	somatosensory-abrupt	relearning	-2.191
105	32	somatosensory-abrupt	relearning	-0.309
106	32	somatosensory-abrupt	relearning	-1.362
107	32	somatosensory-abrupt	relearning	1.156
108	32	somatosensory-abrupt	relearning	-3.5
109	32	somatosensory-abrupt	relearning	-0.849
110	32	somatosensory-abrupt	relearning	-1.537
111	32	somatosensory-abrupt	relearning	-0.198
112	32	somatosensory-abrupt	relearning	-6.683
113	32	somatosensory-abrupt	relearning	-4.373
114	32	somatosensory-abrupt	relearning	-3.14
116	32	somatosensory-abrupt	relearning	-4.814
117	32	somatosensory-abrupt	relearning	-6.849
118	32	somatosensory-abrupt	relearning	-6.58
119	32	somatosensory-abrupt	relearning	-3.171
120	32	somatosensory-abrupt	relearning	-4.77
121	32	somatosensory-abrupt	relearning	-3.309
122	32	somatosensory-abrupt	relearning	-1.217
123	32	somatosensory-abrupt	relearning	-6.168
124	32	somatosensory-abrupt	relearning	-9.931
125	32	somatosensory-abrupt	relearning	4.331
126	32	somatosensory-abrupt	relearning	-4.461
127	32	somatosensory-abrupt	relearning	-0.785
128	32	somatosensory-abrupt	relearning	-10.755
129	32	somatosensory-abrupt	relearning	1.069
130	32	somatosensory-abrupt	relearning	-0.367
131	32	somatosensory-abrupt	relearning	-3.603
132	32	somatosensory-abrupt	relearning	1.766
133	32	somatosensory-abrupt	relearning	0.096
134	32	somatosensory-abrupt	relearning	-3.045
135	32	somatosensory-abrupt	relearning	-2.04
136	32	somatosensory-abrupt	relearning	-6.31
[truncated: 6,638 more rows]

## Sheet: Fig_4B
subjnum	trialnum	adaptation	sessionName	groupName
5	10	1.064	relearning	somatosensory-abrupt
5	55	1.05751	relearning	somatosensory-abrupt
5	85	1.16265	relearning	somatosensory-abrupt
5	115	1.03141	relearning	somatosensory-abrupt
5	145	0.946788	relearning	somatosensory-abrupt
5	150	0.977707	relearning	somatosensory-abrupt
6	10	1.03172	relearning	sham-abrupt
6	55	0.622747	relearning	sham-abrupt
6	85	0.491859	relearning	sham-abrupt
6	115	0.74432	relearning	sham-abrupt
6	145	0.511754	relearning	sham-abrupt
6	150	0.290802	relearning	sham-abrupt
7	10	1.23029	relearning	somatosensory-abrupt
7	55	0.897623	relearning	somatosensory-abrupt
7	85	0.967819	relearning	somatosensory-abrupt
7	115	0.7738	relearning	somatosensory-abrupt
7	145	0.827154	relearning	somatosensory-abrupt
7	150	0.825312	relearning	somatosensory-abrupt
8	10	0.486787	relearning	somatosensory-abrupt
8	55	0.64418	relearning	somatosensory-abrupt
8	85	0.837837	relearning	somatosensory-abrupt
8	115	0.737261	relearning	somatosensory-abrupt
8	145	0.821632	relearning	somatosensory-abrupt
8	150	0.5736	relearning	somatosensory-abrupt
10	10	0.610031	relearning	sham-abrupt
10	55	0.859435	relearning	sham-abrupt
10	85	0.820508	relearning	sham-abrupt
10	115	0.816395	relearning	sham-abrupt
10	145	0.765899	relearning	sham-abrupt
10	150	0.784947	relearning	sham-abrupt
11	10	0.738936	relearning	sham-abrupt
11	55	0.681261	relearning	sham-abrupt
11	85	0.621643	relearning	sham-abrupt
11	115	0.631	relearning	sham-abrupt
11	145	0.584742	relearning	sham-abrupt
11	150	0.983413	relearning	sham-abrupt
12	10	0.698412	relearning	somatosensory-abrupt
12	55	0.596942	relearning	somatosensory-abrupt
12	85	0.920956	relearning	somatosensory-abrupt
12	115	0.738286	relearning	somatosensory-abrupt
12	145	0.90157	relearning	somatosensory-abrupt
12	150	0.892393	relearning	somatosensory-abrupt
22	10	0.782463	relearning	somatosensory-abrupt
22	55	0.976752	relearning	somatosensory-abrupt
22	85	1.04785	relearning	somatosensory-abrupt
22	115	0.846201	relearning	somatosensory-abrupt
22	145	0.911642	relearning	somatosensory-abrupt
22	150	0.750507	relearning	somatosensory-abrupt
23	10	0.51527	relearning	somatosensory-abrupt
23	55	0.874398	relearning	somatosensory-abrupt
23	85	1.02707	relearning	somatosensory-abrupt
23	115	0.751058	relearning	somatosensory-abrupt
23	145	0.695602	relearning	somatosensory-abrupt
23	150	0.712149	relearning	somatosensory-abrupt
25	10	0.994184	relearning	somatosensory-abrupt
25	55	0.652269	relearning	somatosensory-abrupt
25	85	0.596048	relearning	somatosensory-abrupt
25	115	0.595247	relearning	somatosensory-abrupt
25	145	0.886719	relearning	somatosensory-abrupt
25	150	0.400271	relearning	somatosensory-abrupt
26	10	0.400914	relearning	somatosensory-abrupt
26	55	0.602665	relearning	somatosensory-abrupt
26	85	0.544557	relearning	somatosensory-abrupt
26	115	0.533386	relearning	somatosensory-abrupt
26	145	0.497819	relearning	somatosensory-abrupt
26	150	0.456627	relearning	somatosensory-abrupt
30	10	0.631313	relearning	somatosensory-abrupt
30	55	0.639275	relearning	somatosensory-abrupt
30	85	0.78295	relearning	somatosensory-abrupt
30	115	0.795473	relearning	somatosensory-abrupt
30	145	0.887992	relearning	somatosensory-abrupt
30	150	1.30705	relearning	somatosensory-abrupt
31	10	0.724462	relearning	sham-abrupt
31	55	0.874315	relearning	sham-abrupt
31	85	0.956804	relearning	sham-abrupt
31	115	0.904261	relearning	sham-abrupt
31	145	1.03914	relearning	sham-abrupt
31	150	0.853896	relearning	sham-abrupt
32	10	1.11685	relearning	somatosensory-abrupt
32	55	0.897734	relearning	somatosensory-abrupt
32	85	1.0849	relearning	somatosensory-abrupt
32	115	1.00427	relearning	somatosensory-abrupt
32	145	1.01382	relearning	somatosensory-abrupt
32	150	0.841518	relearning	somatosensory-abrupt
34	10	0.773452	relearning	sham-abrupt
34	55	0.771375	relearning	sham-abrupt
34	85	0.419177	relearning	sham-abrupt
34	115	0.683943	relearning	sham-abrupt
34	145	0.804832	relearning	sham-abrupt
34	150	0.785839	relearning	sham-abrupt
35	10	0.869503	relearning	sham-abrupt
35	55	0.916335	relearning	sham-abrupt
35	85	0.638951	relearning	sham-abrupt
35	115	0.844172	relearning	sham-abrupt
35	145	0.925509	relearning	sham-abrupt
35	150	0.411335	relearning	sham-abrupt
40	10	0.690113	relearning	sham-abrupt
40	55	0.99853	relearning	sham-abrupt
40	85	0.812349	relearning	sham-abrupt
40	115	0.619432	relearning	sham-abrupt
40	145	0.81068	relearning	sham-abrupt
40	150	0.708073	relearning	sham-abrupt
41	10	0.827582	relearning	sham-abrupt
41	55	0.558701	relearning	sham-abrupt
41	85	0.664894	relearning	sham-abrupt
41	115	0.774975	relearning	sham-abrupt
41	145	0.860293	relearning	sham-abrupt
41	150	0.971372	relearning	sham-abrupt
42	10	0.792639	relearning	sham-abrupt
42	55	1.04437	relearning	sham-abrupt
42	85	0.949048	relearning	sham-abrupt
42	115	0.620909	relearning	sham-abrupt
42	145	0.941165	relearning	sham-abrupt
42	150	0.76146	relearning	sham-abrupt
43	10	0.446798	relearning	motor-abrupt
43	55	0.867267	relearning	motor-abrupt
43	85	0.726663	relearning	motor-abrupt
43	115	0.864663	relearning	motor-abrupt
43	145	0.829056	relearning	motor-abrupt
43	150	0.802931	relearning	motor-abrupt
44	10	0.458255	relearning	motor-abrupt
44	55	0.729091	relearning	motor-abrupt
44	85	0.706981	relearning	motor-abrupt
44	115	0.73393	relearning	motor-abrupt
44	145	0.794798	relearning	motor-abrupt
44	150	0.428958	relearning	motor-abrupt
46	10	0.544759	relearning	motor-abrupt
46	55	0.529838	relearning	motor-abrupt
46	85	0.429593	relearning	motor-abrupt
46	115	0.452903	relearning	motor-abrupt
46	145	0.707086	relearning	motor-abrupt
46	150	0.80879	relearning	motor-abrupt
48	10	0.795165	relearning	motor-abrupt
48	55	0.786191	relearning	motor-abrupt
48	85	0.843435	relearning	motor-abrupt
48	115	0.586531	relearning	motor-abrupt
48	145	1.03818	relearning	motor-abrupt
48	150	0.87958	relearning	motor-abrupt
49	10	1.24778	relearning	motor-abrupt
49	55	0.791218	relearning	motor-abrupt
49	85	0.69373	relearning	motor-abrupt
49	115	1.02748	relearning	motor-abrupt
49	145	0.784551	relearning	motor-abrupt
49	150	0.675389	relearning	motor-abrupt
51	10	0.8777	relearning	motor-abrupt
51	55	0.861623	relearning	motor-abrupt
51	85	0.890967	relearning	motor-abrupt
51	115	0.853194	relearning	motor-abrupt
51	145	0.899927	relearning	motor-abrupt
51	150	1.08013	relearning	motor-abrupt
52	10	1.02936	relearning	motor-abrupt
52	55	0.998984	relearning	motor-abrupt
52	85	1.20353	relearning	motor-abrupt
52	115	1.15409	relearning	motor-abrupt
52	145	0.940886	relearning	motor-abrupt
52	150	0.889149	relearning	motor-abrupt
57	10	0.529315	relearning	motor-abrupt
57	55	0.430593	relearning	motor-abrupt
57	85	0.853725	relearning	motor-abrupt
57	115	0.905314	relearning	motor-abrupt
57	145	0.695755	relearning	motor-abrupt
57	150	0.962317	relearning	motor-abrupt
59	10	0.548786	relearning	motor-abrupt
59	55	0.7038	relearning	motor-abrupt
59	85	1.14537	relearning	motor-abrupt
59	115	0.627603	relearning	motor-abrupt
59	145	0.81332	relearning	motor-abrupt
59	150	0.875663	relearning	motor-abrupt
62	10	0.866272	relearning	motor-abrupt
62	55	0.903361	relearning	motor-abrupt
62	85	0.769332	relearning	motor-abrupt
62	115	0.79049	relearning	motor-abrupt
62	145	0.751335	relearning	motor-abrupt
62	150	0.707127	relearning	motor-abrupt
64	10	0.796128	relearning	sham-abrupt
64	55	0.558051	relearning	sham-abrupt
64	85	0.835651	relearning	sham-abrupt
64	115	0.609734	relearning	sham-abrupt
64	145	0.708504	relearning	sham-abrupt
64	150	0.942949	relearning	sham-abrupt
82	10	0.172187	relearning	somatosensory-gradual
82	55	0.75656	relearning	somatosensory-gradual
82	85	0.683616	relearning	somatosensory-gradual
82	115	0.540902	relearning	somatosensory-gradual
82	145	0.851996	relearning	somatosensory-gradual
82	150	0.780699	relearning	somatosensory-gradual
83	10	0.343119	relearning	somatosensory-gradual
83	55	0.738049	relearning	somatosensory-gradual
83	85	0.589049	relearning	somatosensory-gradual
83	115	0.624611	relearning	somatosensory-gradual
83	145	0.872417	relearning	somatosensory-gradual
83	150	0.59678	relearning	somatosensory-gradual
85	10	0.252693	relearning	somatosensory-gradual
85	55	0.498317	relearning	somatosensory-gradual
85	85	0.52618	relearning	somatosensory-gradual
85	115	0.857029	relearning	somatosensory-gradual
85	145	0.689588	relearning	somatosensory-gradual
85	150	1.01246	relearning	somatosensory-gradual
88	10	0.462745	relearning	somatosensory-gradual
88	55	0.545019	relearning	somatosensory-gradual
88	85	0.641869	relearning	somatosensory-gradual
88	115	0.632691	relearning	somatosensory-gradual
88	145	0.707367	relearning	somatosensory-gradual
88	150	0.728593	relearning	somatosensory-gradual
91	10	0.0650644	relearning	somatosensory-gradual
91	55	0.485462	relearning	somatosensory-gradual
91	85	0.581756	relearning	somatosensory-gradual
91	115	0.693023	relearning	somatosensory-gradual
91	145	0.721588	relearning	somatosensory-gradual
91	150	0.647835	relearning	somatosensory-gradual
92	10	0.0116444	relearning	somatosensory-gradual
92	55	0.600956	relearning	somatosensory-gradual
92	85	0.766125	relearning	somatosensory-gradual
92	115	0.826877	relearning	somatosensory-gradual
92	145	0.922237	relearning	somatosensory-gradual
92	150	0.818245	relearning	somatosensory-gradual
93	10	0.47876	relearning	somatosensory-gradual
93	55	1.06798	relearning	somatosensory-gradual
93	85	0.862976	relearning	somatosensory-gradual
93	115	1.1414	relearning	somatosensory-gradual
93	145	1.03264	relearning	somatosensory-gradual
93	150	0.666915	relearning	somatosensory-gradual
95	10	0.567709	relearning	somatosensory-gradual
95	55	0.508875	relearning	somatosensory-gradual
95	85	0.738448	relearning	somatosensory-gradual
95	115	0.731614	relearning	somatosensory-gradual
95	145	0.661887	relearning	somatosensory-gradual
95	150	0.77272	relearning	somatosensory-gradual
99	10	0.115614	relearning	somatosensory-gradual
99	55	0.287199	relearning	somatosensory-gradual
99	85	0.885227	relearning	somatosensory-gradual
99	115	0.720613	relearning	somatosensory-gradual
99	145	0.847293	relearning	somatosensory-gradual
99	150	0.797068	relearning	somatosensory-gradual
101	10	0.432079	relearning	somatosensory-gradual
101	55	0.693763	relearning	somatosensory-gradual
101	85	0.789159	relearning	somatosensory-gradual
101	115	0.760212	relearning	somatosensory-gradual
101	145	0.824199	relearning	somatosensory-gradual
101	150	1.01703	relearning	somatosensory-gradual
102	10	0.80138	relearning	somatosensory-gradual-24h
102	55	0.823898	relearning	somatosensory-gradual-24h
102	85	0.989059	relearning	somatosensory-gradual-24h
102	115	0.980563	relearning	somatosensory-gradual-24h
102	145	0.978424	relearning	somatosensory-gradual-24h
102	150	0.983	relearning	somatosensory-gradual-24h
105	10	0.607986	relearning	somatosensory-gradual-24h
105	55	0.672477	relearning	somatosensory-gradual-24h
105	85	0.810361	relearning	somatosensory-gradual-24h
105	115	0.741008	relearning	somatosensory-gradual-24h
105	145	0.85775	relearning	somatosensory-gradual-24h
105	150	1.0059	relearning	somatosensory-gradual-24h
106	10	0.598579	relearning	somatosensory-gradual-24h
106	55	0.682192	relearning	somatosensory-gradual-24h
106	85	0.78664	relearning	somatosensory-gradual-24h
106	115	0.79835	relearning	somatosensory-gradual-24h
106	145	0.768015	relearning	somatosensory-gradual-24h
106	150	0.781748	relearning	somatosensory-gradual-24h
108	10	0.7547	relearning	somatosensory-gradual-24h
108	55	0.607709	relearning	somatosensory-gradual-24h
108	85	0.772029	relearning	somatosensory-gradual-24h
108	115	0.746317	relearning	somatosensory-gradual-24h
108	145	0.933692	relearning	somatosensory-gradual-24h
108	150	0.598907	relearning	somatosensory-gradual-24h
109	10	0.783678	relearning	somatosensory-gradual-24h
109	55	0.684355	relearning	somatosensory-gradual-24h
109	85	0.8262	relearning	somatosensory-gradual-24h
109	115	0.663065	relearning	somatosensory-gradual-24h
109	145	0.975382	relearning	somatosensory-gradual-24h
109	150	0.805667	relearning	somatosensory-gradual-24h
110	10	0.645029	relearning	somatosensory-gradual-24h
110	55	0.740172	relearning	somatosensory-gradual-24h
110	85	0.623382	relearning	somatosensory-gradual-24h
110	115	0.77351	relearning	somatosensory-gradual-24h
110	145	0.872814	relearning	somatosensory-gradual-24h
110	150	0.829296	relearning	somatosensory-gradual-24h
111	10	0.745977	relearning	somatosensory-gradual-24h
111	55	0.645771	relearning	somatosensory-gradual-24h
111	85	0.813249	relearning	somatosensory-gradual-24h
111	115	0.749772	relearning	somatosensory-gradual-24h
111	145	1.07545	relearning	somatosensory-gradual-24h
111	150	0.616698	relearning	somatosensory-gradual-24h
113	10	0.551934	relearning	somatosensory-gradual-24h
113	55	0.655234	relearning	somatosensory-gradual-24h
113	85	0.791167	relearning	somatosensory-gradual-24h
113	115	0.820557	relearning	somatosensory-gradual-24h
113	145	0.758361	relearning	somatosensory-gradual-24h
113	150	0.986008	relearning	somatosensory-gradual-24h
114	10	0.890012	relearning	somatosensory-gradual-24h
114	55	0.914348	relearning	somatosensory-gradual-24h
114	85	0.785165	relearning	somatosensory-gradual-24h
114	115	0.774285	relearning	somatosensory-gradual-24h
114	145	0.662449	relearning	somatosensory-gradual-24h
114	150	0.897142	relearning	somatosensory-gradual-24h
115	10	0.572041	relearning	somatosensory-gradual-24h
115	55	0.900405	relearning	somatosensory-gradual-24h
115	85	0.676788	relearning	somatosensory-gradual-24h
115	115	0.770577	relearning	somatosensory-gradual-24h
115	145	0.896285	relearning	somatosensory-gradual-24h
115	150	0.833881	relearning	somatosensory-gradual-24h
126	10	1.13704	relearning	motor-gradual
126	55	0.849473	relearning	motor-gradual
126	85	1.03665	relearning	motor-gradual
126	115	1.10521	relearning	motor-gradual
126	145	0.927635	relearning	motor-gradual
126	150	1.04277	relearning	motor-gradual
127	10	1.28072	relearning	motor-gradual
127	55	0.687071	relearning	motor-gradual
127	85	0.800592	relearning	motor-gradual
127	115	0.834996	relearning	motor-gradual
127	145	0.851594	relearning	motor-gradual
127	150	0.777656	relearning	motor-gradual
128	10	0.724538	relearning	motor-gradual
128	55	0.951539	relearning	motor-gradual
128	85	0.756211	relearning	motor-gradual
128	115	0.857642	relearning	motor-gradual
128	145	0.869702	relearning	motor-gradual
128	150	0.864357	relearning	motor-gradual
129	10	0.532326	relearning	motor-gradual
129	55	0.763986	relearning	motor-gradual
129	85	0.722422	relearning	motor-gradual
129	115	0.973052	relearning	motor-gradual
129	145	0.859393	relearning	motor-gradual
129	150	0.966429	relearning	motor-gradual
130	10	0.546133	relearning	motor-gradual
130	55	0.672619	relearning	motor-gradual
130	85	0.884038	relearning	motor-gradual
130	115	0.826164	relearning	motor-gradual
130	145	0.791983	relearning	motor-gradual
130	150	0.860343	relearning	motor-gradual
131	10	0.540863	relearning	motor-gradual
131	55	0.623062	relearning	motor-gradual
131	85	0.758858	relearning	motor-gradual
131	115	0.785537	relearning	motor-gradual
131	145	0.674515	relearning	motor-gradual
131	150	0.680762	relearning	motor-gradual
132	10	0.568583	relearning	motor-gradual
132	55	0.816296	relearning	motor-gradual
132	85	0.934494	relearning	motor-gradual
132	115	0.965287	relearning	motor-gradual
132	145	0.708076	relearning	motor-gradual
132	150	0.98288	relearning	motor-gradual
135	10	0.994084	relearning	motor-gradual
135	55	0.572104	relearning	motor-gradual
135	85	0.678019	relearning	motor-gradual
135	115	0.810996	relearning	motor-gradual
135	145	0.606896	relearning	motor-gradual
135	150	0.880641	relearning	motor-gradual
137	10	0.854379	relearning	motor-gradual
137	55	0.91984	relearning	motor-gradual
137	85	0.668371	relearning	motor-gradual
137	115	0.797234	relearning	motor-gradual
137	145	0.797753	relearning	motor-gradual
137	150	0.677394	relearning	motor-gradual
138	10	0.748977	relearning	motor-gradual
138	55	0.77881	relearning	motor-gradual
138	85	0.669136	relearning	motor-gradual
138	115	0.901224	relearning	motor-gradual
138	145	0.793634	relearning	motor-gradual
138	150	0.773037	relearning	motor-gradual

## Sheet: Fig_4C
trialnum	subjnum	groupName	sessionName	learner	pd
6	5	somatosensory-abrupt	learning	naive	15.969
7	5	somatosensory-abrupt	learning	naive	21.826
8	5	somatosensory-abrupt	learning	naive	17.077
9	5	somatosensory-abrupt	learning	naive	21.338
11	5	somatosensory-abrupt	learning	naive	6.656
12	5	somatosensory-abrupt	learning	naive	10.28
13	5	somatosensory-abrupt	learning	naive	7.658
14	5	somatosensory-abrupt	learning	naive	2.29
15	5	somatosensory-abrupt	learning	naive	9.284
16	5	somatosensory-abrupt	learning	naive	7.4
17	5	somatosensory-abrupt	learning	naive	2.679
18	5	somatosensory-abrupt	learning	naive	6.927
19	5	somatosensory-abrupt	learning	naive	-0.419
20	5	somatosensory-abrupt	learning	naive	8.345
21	5	somatosensory-abrupt	learning	naive	2.396
22	5	somatosensory-abrupt	learning	naive	9.972
23	5	somatosensory-abrupt	learning	naive	2.031
24	5	somatosensory-abrupt	learning	naive	-3.107
25	5	somatosensory-abrupt	learning	naive	4.889
26	5	somatosensory-abrupt	learning	naive	-2.086
27	5	somatosensory-abrupt	learning	naive	-0.181
28	5	somatosensory-abrupt	learning	naive	-9.916
29	5	somatosensory-abrupt	learning	naive	4.861
30	5	somatosensory-abrupt	learning	naive	7.327
31	5	somatosensory-abrupt	learning	naive	7.313
32	5	somatosensory-abrupt	learning	naive	2.325
33	5	somatosensory-abrupt	learning	naive	7.695
34	5	somatosensory-abrupt	learning	naive	12.165
35	5	somatosensory-abrupt	learning	naive	11.273
36	5	somatosensory-abrupt	learning	naive	-1.125
37	5	somatosensory-abrupt	learning	naive	2.15
38	5	somatosensory-abrupt	learning	naive	-11.205
39	5	somatosensory-abrupt	learning	naive	6.492
40	5	somatosensory-abrupt	learning	naive	4.125
41	5	somatosensory-abrupt	learning	naive	-6.235
42	5	somatosensory-abrupt	learning	naive	-4.396
43	5	somatosensory-abrupt	learning	naive	-4.444
44	5	somatosensory-abrupt	learning	naive	-2.465
45	5	somatosensory-abrupt	learning	naive	-6.95
46	5	somatosensory-abrupt	learning	naive	-4.059
47	5	somatosensory-abrupt	learning	naive	-1.529
48	5	somatosensory-abrupt	learning	naive	7.32
49	5	somatosensory-abrupt	learning	naive	-7.189
50	5	somatosensory-abrupt	learning	naive	3.068
51	5	somatosensory-abrupt	learning	naive	-2.47
52	5	somatosensory-abrupt	learning	naive	-7.241
53	5	somatosensory-abrupt	learning	naive	-7.712
54	5	somatosensory-abrupt	learning	naive	-3.057
56	5	somatosensory-abrupt	learning	naive	-6.427
57	5	somatosensory-abrupt	learning	naive	-7.193
58	5	somatosensory-abrupt	learning	naive	-12.552
59	5	somatosensory-abrupt	learning	naive	-2.979
60	5	somatosensory-abrupt	learning	naive	-12.209
61	5	somatosensory-abrupt	learning	naive	-1.769
62	5	somatosensory-abrupt	learning	naive	-2.793
63	5	somatosensory-abrupt	learning	naive	-6.199
64	5	somatosensory-abrupt	learning	naive	-6.755
65	5	somatosensory-abrupt	learning	naive	-10.311
66	5	somatosensory-abrupt	learning	naive	-3.786
67	5	somatosensory-abrupt	learning	naive	-7.966
68	5	somatosensory-abrupt	learning	naive	3.317
69	5	somatosensory-abrupt	learning	naive	-11.924
70	5	somatosensory-abrupt	learning	naive	2.107
71	5	somatosensory-abrupt	learning	naive	-11.117
72	5	somatosensory-abrupt	learning	naive	-1.648
73	5	somatosensory-abrupt	learning	naive	-14.536
74	5	somatosensory-abrupt	learning	naive	0.876
75	5	somatosensory-abrupt	learning	naive	-10.425
76	5	somatosensory-abrupt	learning	naive	-3.832
77	5	somatosensory-abrupt	learning	naive	-4.3
78	5	somatosensory-abrupt	learning	naive	-12.25
79	5	somatosensory-abrupt	learning	naive	-6.729
80	5	somatosensory-abrupt	learning	naive	-4.99
81	5	somatosensory-abrupt	learning	naive	-20.389
82	5	somatosensory-abrupt	learning	naive	-2.633
83	5	somatosensory-abrupt	learning	naive	-11.598
84	5	somatosensory-abrupt	learning	naive	-0.342
86	5	somatosensory-abrupt	learning	naive	-7.12
87	5	somatosensory-abrupt	learning	naive	-5.138
88	5	somatosensory-abrupt	learning	naive	0.441
89	5	somatosensory-abrupt	learning	naive	-12.521
90	5	somatosensory-abrupt	learning	naive	11.117
91	5	somatosensory-abrupt	learning	naive	-11.014
92	5	somatosensory-abrupt	learning	naive	0.837
93	5	somatosensory-abrupt	learning	naive	-9.226
94	5	somatosensory-abrupt	learning	naive	1.983
95	5	somatosensory-abrupt	learning	naive	-1.093
96	5	somatosensory-abrupt	learning	naive	-3.855
97	5	somatosensory-abrupt	learning	naive	-5.882
98	5	somatosensory-abrupt	learning	naive	-10.135
99	5	somatosensory-abrupt	learning	naive	-12.509
100	5	somatosensory-abrupt	learning	naive	-1.468
101	5	somatosensory-abrupt	learning	naive	-7.862
102	5	somatosensory-abrupt	learning	naive	-2.027
103	5	somatosensory-abrupt	learning	naive	-2.156
104	5	somatosensory-abrupt	learning	naive	-13
105	5	somatosensory-abrupt	learning	naive	5.78
106	5	somatosensory-abrupt	learning	naive	-2.057
107	5	somatosensory-abrupt	learning	naive	-0.659
108	5	somatosensory-abrupt	learning	naive	2.346
109	5	somatosensory-abrupt	learning	naive	-9.499
110	5	somatosensory-abrupt	learning	naive	-9.926
111	5	somatosensory-abrupt	learning	naive	1.361
112	5	somatosensory-abrupt	learning	naive	-17.558
113	5	somatosensory-abrupt	learning	naive	11.364
114	5	somatosensory-abrupt	learning	naive	-6.743
116	5	somatosensory-abrupt	learning	naive	-8.095
117	5	somatosensory-abrupt	learning	naive	-1.944
118	5	somatosensory-abrupt	learning	naive	-12.866
119	5	somatosensory-abrupt	learning	naive	-2.758
120	5	somatosensory-abrupt	learning	naive	-16.806
121	5	somatosensory-abrupt	learning	naive	-2.411
122	5	somatosensory-abrupt	learning	naive	-5.827
123	5	somatosensory-abrupt	learning	naive	-8.5
124	5	somatosensory-abrupt	learning	naive	-0.459
125	5	somatosensory-abrupt	learning	naive	-7.218
126	5	somatosensory-abrupt	learning	naive	-4.949
127	5	somatosensory-abrupt	learning	naive	-8.807
128	5	somatosensory-abrupt	learning	naive	-4.069
129	5	somatosensory-abrupt	learning	naive	-1.966
130	5	somatosensory-abrupt	learning	naive	-4.488
131	5	somatosensory-abrupt	learning	naive	-14.192
132	5	somatosensory-abrupt	learning	naive	-7.841
133	5	somatosensory-abrupt	learning	naive	-13.409
134	5	somatosensory-abrupt	learning	naive	-6.692
135	5	somatosensory-abrupt	learning	naive	3.911
136	5	somatosensory-abrupt	learning	naive	-14.254
137	5	somatosensory-abrupt	learning	naive	-0.168
138	5	somatosensory-abrupt	learning	naive	-18.16
139	5	somatosensory-abrupt	learning	naive	4.687
140	5	somatosensory-abrupt	learning	naive	-5.314
141	5	somatosensory-abrupt	learning	naive	3.303
142	5	somatosensory-abrupt	learning	naive	2.307
143	5	somatosensory-abrupt	learning	naive	-6.018
144	5	somatosensory-abrupt	learning	naive	-5.139
146	5	somatosensory-abrupt	learning	naive	-7.415
147	5	somatosensory-abrupt	learning	naive	-20.285
148	5	somatosensory-abrupt	learning	naive	-9.577
149	5	somatosensory-abrupt	learning	naive	3.171
151	5	somatosensory-abrupt	learning	naive	-4.431
152	5	somatosensory-abrupt	learning	naive	-1.875
153	5	somatosensory-abrupt	learning	naive	1.842
154	5	somatosensory-abrupt	learning	naive	-12.115
155	5	somatosensory-abrupt	learning	naive	0.686
6	7	somatosensory-abrupt	learning	naive	31.592
7	7	somatosensory-abrupt	learning	naive	20.436
8	7	somatosensory-abrupt	learning	naive	21.781
9	7	somatosensory-abrupt	learning	naive	32.324
11	7	somatosensory-abrupt	learning	naive	14.617
12	7	somatosensory-abrupt	learning	naive	10.702
13	7	somatosensory-abrupt	learning	naive	10.725
14	7	somatosensory-abrupt	learning	naive	5.588
15	7	somatosensory-abrupt	learning	naive	8.237
16	7	somatosensory-abrupt	learning	naive	3.224
17	7	somatosensory-abrupt	learning	naive	12.775
18	7	somatosensory-abrupt	learning	naive	10.25
19	7	somatosensory-abrupt	learning	naive	10.998
20	7	somatosensory-abrupt	learning	naive	5.922
21	7	somatosensory-abrupt	learning	naive	9.543
22	7	somatosensory-abrupt	learning	naive	0.274
23	7	somatosensory-abrupt	learning	naive	8.109
24	7	somatosensory-abrupt	learning	naive	-4.274
25	7	somatosensory-abrupt	learning	naive	4.834
26	7	somatosensory-abrupt	learning	naive	-0.598
27	7	somatosensory-abrupt	learning	naive	5.626
28	7	somatosensory-abrupt	learning	naive	-3.479
29	7	somatosensory-abrupt	learning	naive	9.396
30	7	somatosensory-abrupt	learning	naive	4.854
31	7	somatosensory-abrupt	learning	naive	5.645
32	7	somatosensory-abrupt	learning	naive	-4.411
33	7	somatosensory-abrupt	learning	naive	-1.215
34	7	somatosensory-abrupt	learning	naive	-1.204
35	7	somatosensory-abrupt	learning	naive	2.247
36	7	somatosensory-abrupt	learning	naive	3.177
37	7	somatosensory-abrupt	learning	naive	6.738
38	7	somatosensory-abrupt	learning	naive	0.334
39	7	somatosensory-abrupt	learning	naive	10.549
40	7	somatosensory-abrupt	learning	naive	-2.755
41	7	somatosensory-abrupt	learning	naive	0.304
42	7	somatosensory-abrupt	learning	naive	2.133
43	7	somatosensory-abrupt	learning	naive	10.033
44	7	somatosensory-abrupt	learning	naive	3.465
45	7	somatosensory-abrupt	learning	naive	2.145
46	7	somatosensory-abrupt	learning	naive	3.507
47	7	somatosensory-abrupt	learning	naive	0.332
48	7	somatosensory-abrupt	learning	naive	2.453
49	7	somatosensory-abrupt	learning	naive	15.2
50	7	somatosensory-abrupt	learning	naive	-4.548
51	7	somatosensory-abrupt	learning	naive	1.135
52	7	somatosensory-abrupt	learning	naive	4.199
53	7	somatosensory-abrupt	learning	naive	3.505
54	7	somatosensory-abrupt	learning	naive	0.61
56	7	somatosensory-abrupt	learning	naive	-4.326
57	7	somatosensory-abrupt	learning	naive	10.344
58	7	somatosensory-abrupt	learning	naive	4.043
59	7	somatosensory-abrupt	learning	naive	-6.463
60	7	somatosensory-abrupt	learning	naive	1.297
61	7	somatosensory-abrupt	learning	naive	-1.9
62	7	somatosensory-abrupt	learning	naive	-1.588
63	7	somatosensory-abrupt	learning	naive	-6.301
64	7	somatosensory-abrupt	learning	naive	3.599
65	7	somatosensory-abrupt	learning	naive	4.234
66	7	somatosensory-abrupt	learning	naive	0.131
67	7	somatosensory-abrupt	learning	naive	-0.05
68	7	somatosensory-abrupt	learning	naive	1.473
69	7	somatosensory-abrupt	learning	naive	-1.514
70	7	somatosensory-abrupt	learning	naive	6.611
71	7	somatosensory-abrupt	learning	naive	-7.607
72	7	somatosensory-abrupt	learning	naive	3.748
73	7	somatosensory-abrupt	learning	naive	-2.525
74	7	somatosensory-abrupt	learning	naive	1.057
75	7	somatosensory-abrupt	learning	naive	0.174
76	7	somatosensory-abrupt	learning	naive	-6.368
77	7	somatosensory-abrupt	learning	naive	-1.7
78	7	somatosensory-abrupt	learning	naive	-7.452
79	7	somatosensory-abrupt	learning	naive	3.368
80	7	somatosensory-abrupt	learning	naive	-3.842
81	7	somatosensory-abrupt	learning	naive	0.552
82	7	somatosensory-abrupt	learning	naive	-4.008
83	7	somatosensory-abrupt	learning	naive	7.411
84	7	somatosensory-abrupt	learning	naive	-4.646
86	7	somatosensory-abrupt	learning	naive	0.704
87	7	somatosensory-abrupt	learning	naive	-5.13
88	7	somatosensory-abrupt	learning	naive	-5.481
89	7	somatosensory-abrupt	learning	naive	-8.989
90	7	somatosensory-abrupt	learning	naive	-5.007
91	7	somatosensory-abrupt	learning	naive	3.783
92	7	somatosensory-abrupt	learning	naive	-3.81
93	7	somatosensory-abrupt	learning	naive	-5.06
94	7	somatosensory-abrupt	learning	naive	2.219
95	7	somatosensory-abrupt	learning	naive	-5.125
96	7	somatosensory-abrupt	learning	naive	-11.989
97	7	somatosensory-abrupt	learning	naive	13.692
98	7	somatosensory-abrupt	learning	naive	3.059
99	7	somatosensory-abrupt	learning	naive	-1.248
100	7	somatosensory-abrupt	learning	naive	9.938
101	7	somatosensory-abrupt	learning	naive	-4.751
102	7	somatosensory-abrupt	learning	naive	3.559
103	7	somatosensory-abrupt	learning	naive	-2.564
104	7	somatosensory-abrupt	learning	naive	-2.726
105	7	somatosensory-abrupt	learning	naive	-5.717
106	7	somatosensory-abrupt	learning	naive	2.873
107	7	somatosensory-abrupt	learning	naive	9.391
108	7	somatosensory-abrupt	learning	naive	-5.293
109	7	somatosensory-abrupt	learning	naive	3.983
110	7	somatosensory-abrupt	learning	naive	-7.724
111	7	somatosensory-abrupt	learning	naive	0.013
112	7	somatosensory-abrupt	learning	naive	-1.404
113	7	somatosensory-abrupt	learning	naive	0.052
114	7	somatosensory-abrupt	learning	naive	-10.916
116	7	somatosensory-abrupt	learning	naive	-1.852
117	7	somatosensory-abrupt	learning	naive	-9.518
118	7	somatosensory-abrupt	learning	naive	3.541
119	7	somatosensory-abrupt	learning	naive	0.839
120	7	somatosensory-abrupt	learning	naive	2.536
121	7	somatosensory-abrupt	learning	naive	4.62
122	7	somatosensory-abrupt	learning	naive	-0.303
123	7	somatosensory-abrupt	learning	naive	-6.343
124	7	somatosensory-abrupt	learning	naive	-1.283
125	7	somatosensory-abrupt	learning	naive	-0.732
126	7	somatosensory-abrupt	learning	naive	-4.201
127	7	somatosensory-abrupt	learning	naive	11.443
128	7	somatosensory-abrupt	learning	naive	12.522
129	7	somatosensory-abrupt	learning	naive	-3.836
130	7	somatosensory-abrupt	learning	naive	7.237
131	7	somatosensory-abrupt	learning	naive	-0.868
132	7	somatosensory-abrupt	learning	naive	-4.151
133	7	somatosensory-abrupt	learning	naive	-10.517
134	7	somatosensory-abrupt	learning	naive	2.246
135	7	somatosensory-abrupt	learning	naive	0.593
136	7	somatosensory-abrupt	learning	naive	-4.836
137	7	somatosensory-abrupt	learning	naive	8.274
138	7	somatosensory-abrupt	learning	naive	-6.558
139	7	somatosensory-abrupt	learning	naive	-7.91
140	7	somatosensory-abrupt	learning	naive	-5.473
141	7	somatosensory-abrupt	learning	naive	-6.709
142	7	somatosensory-abrupt	learning	naive	0.743
143	7	somatosensory-abrupt	learning	naive	-9.362
144	7	somatosensory-abrupt	learning	naive	-6.406
146	7	somatosensory-abrupt	learning	naive	6.561
147	7	somatosensory-abrupt	learning	naive	-12.399
148	7	somatosensory-abrupt	learning	naive	-5.832
149	7	somatosensory-abrupt	learning	naive	2.008
151	7	somatosensory-abrupt	learning	naive	-3.049
152	7	somatosensory-abrupt	learning	naive	0.979
153	7	somatosensory-abrupt	learning	naive	4.181
154	7	somatosensory-abrupt	learning	naive	2.007
155	7	somatosensory-abrupt	learning	naive	5.295
6	6	sham-abrupt	learning	naive	13.643
7	6	sham-abrupt	learning	naive	11.81
8	6	sham-abrupt	learning	naive	12.245
9	6	sham-abrupt	learning	naive	8.167
11	6	sham-abrupt	learning	naive	0.461
12	6	sham-abrupt	learning	naive	7.908
13	6	sham-abrupt	learning	naive	8.788
14	6	sham-abrupt	learning	naive	7.14
15	6	sham-abrupt	learning	naive	15.365
16	6	sham-abrupt	learning	naive	2.835
17	6	sham-abrupt	learning	naive	8.887
18	6	sham-abrupt	learning	naive	4.865
19	6	sham-abrupt	learning	naive	11.862
20	6	sham-abrupt	learning	naive	6.495
21	6	sham-abrupt	learning	naive	0.272
22	6	sham-abrupt	learning	naive	1.83
23	6	sham-abrupt	learning	naive	-6.486
24	6	sham-abrupt	learning	naive	14.749
25	6	sham-abrupt	learning	naive	-0.388
26	6	sham-abrupt	learning	naive	-1.01
27	6	sham-abrupt	learning	naive	9.14
28	6	sham-abrupt	learning	naive	3.371
29	6	sham-abrupt	learning	naive	8.944
30	6	sham-abrupt	learning	naive	-0.163
31	6	sham-abrupt	learning	naive	9.84
32	6	sham-abrupt	learning	naive	10.432
33	6	sham-abrupt	learning	naive	8.528
34	6	sham-abrupt	learning	naive	-4.805
35	6	sham-abrupt	learning	naive	5.721
36	6	sham-abrupt	learning	naive	6.153
37	6	sham-abrupt	learning	naive	5.399
38	6	sham-abrupt	learning	naive	11.127
39	6	sham-abrupt	learning	naive	1.19
40	6	sham-abrupt	learning	naive	0.431
41	6	sham-abrupt	learning	naive	-4.152
42	6	sham-abrupt	learning	naive	1.838
43	6	sham-abrupt	learning	naive	2.382
44	6	sham-abrupt	learning	naive	7.287
45	6	sham-abrupt	learning	naive	-0.924
46	6	sham-abrupt	learning	naive	8.001
47	6	sham-abrupt	learning	naive	4.572
48	6	sham-abrupt	learning	naive	-1.437
49	6	sham-abrupt	learning	naive	-4.508
50	6	sham-abrupt	learning	naive	9.005
51	6	sham-abrupt	learning	naive	3.215
52	6	sham-abrupt	learning	naive	0.656
53	6	sham-abrupt	learning	naive	1.133
54	6	sham-abrupt	learning	naive	-3.195
56	6	sham-abrupt	learning	naive	18.17
57	6	sham-abrupt	learning	naive	9.452
58	6	sham-abrupt	learning	naive	8.147
59	6	sham-abrupt	learning	naive	4.421
60	6	sham-abrupt	learning	naive	3.667
61	6	sham-abrupt	learning	naive	5.333
62	6	sham-abrupt	learning	naive	4.443
63	6	sham-abrupt	learning	naive	3.114
64	6	sham-abrupt	learning	naive	2.09
65	6	sham-abrupt	learning	naive	4.776
66	6	sham-abrupt	learning	naive	-1.217
67	6	sham-abrupt	learning	naive	-6.129
68	6	sham-abrupt	learning	naive	-5.433
69	6	sham-abrupt	learning	naive	2.235
70	6	sham-abrupt	learning	naive	-0.046
71	6	sham-abrupt	learning	naive	9.192
72	6	sham-abrupt	learning	naive	2.013
73	6	sham-abrupt	learning	naive	-1.488
74	6	sham-abrupt	learning	naive	-0.967
75	6	sham-abrupt	learning	naive	1.881
76	6	sham-abrupt	learning	naive	-0.508
77	6	sham-abrupt	learning	naive	10.899
78	6	sham-abrupt	learning	naive	0.232
79	6	sham-abrupt	learning	naive	9.627
80	6	sham-abrupt	learning	naive	-2.375
81	6	sham-abrupt	learning	naive	0.762
82	6	sham-abrupt	learning	naive	-3.035
83	6	sham-abrupt	learning	naive	4.068
84	6	sham-abrupt	learning	naive	0.916
86	6	sham-abrupt	learning	naive	9.83
87	6	sham-abrupt	learning	naive	-9.128
88	6	sham-abrupt	learning	naive	6.228
89	6	sham-abrupt	learning	naive	2.1
90	6	sham-abrupt	learning	naive	4.204
91	6	sham-abrupt	learning	naive	-0.84
92	6	sham-abrupt	learning	naive	42.158
93	6	sham-abrupt	learning	naive	-11.216
94	6	sham-abrupt	learning	naive	-6.338
95	6	sham-abrupt	learning	naive	7.875
96	6	sham-abrupt	learning	naive	-7.529
97	6	sham-abrupt	learning	naive	9.393
98	6	sham-abrupt	learning	naive	-0.35
99	6	sham-abrupt	learning	naive	9.103
100	6	sham-abrupt	learning	naive	-0.022
101	6	sham-abrupt	learning	naive	4.209
102	6	sham-abrupt	learning	naive	-0.319
103	6	sham-abrupt	learning	naive	-1.312
104	6	sham-abrupt	learning	naive	-5.312
105	6	sham-abrupt	learning	naive	-1.841
106	6	sham-abrupt	learning	naive	1.634
107	6	sham-abrupt	learning	naive	-5.009
108	6	sham-abrupt	learning	naive	8.054
109	6	sham-abrupt	learning	naive	6.375
110	6	sham-abrupt	learning	naive	3.225
111	6	sham-abrupt	learning	naive	-5.879
112	6	sham-abrupt	learning	naive	-0.39
113	6	sham-abrupt	learning	naive	2.801
114	6	sham-abrupt	learning	naive	-4.384
116	6	sham-abrupt	learning	naive	-1.462
117	6	sham-abrupt	learning	naive	-14.768
118	6	sham-abrupt	learning	naive	-3.523
119	6	sham-abrupt	learning	naive	-7.36
120	6	sham-abrupt	learning	naive	0.239
121	6	sham-abrupt	learning	naive	2.608
122	6	sham-abrupt	learning	naive	-2.728
123	6	sham-abrupt	learning	naive	-6.853
124	6	sham-abrupt	learning	naive	5.561
125	6	sham-abrupt	learning	naive	1.005
126	6	sham-abrupt	learning	naive	0.199
127	6	sham-abrupt	learning	naive	13.699
128	6	sham-abrupt	learning	naive	-4.505
129	6	sham-abrupt	learning	naive	-6.128
130	6	sham-abrupt	learning	naive	-4.205
131	6	sham-abrupt	learning	naive	3.944
132	6	sham-abrupt	learning	naive	1.451
133	6	sham-abrupt	learning	naive	1.147
134	6	sham-abrupt	learning	naive	10.338
135	6	sham-abrupt	learning	naive	1.269
136	6	sham-abrupt	learning	naive	-3.482
137	6	sham-abrupt	learning	naive	0.85
138	6	sham-abrupt	learning	naive	3.427
139	6	sham-abrupt	learning	naive	0.394
140	6	sham-abrupt	learning	naive	-7.933
141	6	sham-abrupt	learning	naive	-1.547
142	6	sham-abrupt	learning	naive	9.183
143	6	sham-abrupt	learning	naive	-4.412
144	6	sham-abrupt	learning	naive	-3.495
146	6	sham-abrupt	learning	naive	-6.874
147	6	sham-abrupt	learning	naive	6.727
148	6	sham-abrupt	learning	naive	0.143
149	6	sham-abrupt	learning	naive	-11.116
151	6	sham-abrupt	learning	naive	2.338
152	6	sham-abrupt	learning	naive	-6.682
153	6	sham-abrupt	learning	naive	-4.648
154	6	sham-abrupt	learning	naive	-6.972
155	6	sham-abrupt	learning	naive	-8.736
6	8	somatosensory-abrupt	learning	naive	24.05
7	8	somatosensory-abrupt	learning	naive	14.976
8	8	somatosensory-abrupt	learning	naive	10.029
9	8	somatosensory-abrupt	learning	naive	8.215
11	8	somatosensory-abrupt	learning	naive	11.643
12	8	somatosensory-abrupt	learning	naive	7.814
13	8	somatosensory-abrupt	learning	naive	9.224
14	8	somatosensory-abrupt	learning	naive	9.306
15	8	somatosensory-abrupt	learning	naive	8.08
16	8	somatosensory-abrupt	learning	naive	-30.905
17	8	somatosensory-abrupt	learning	naive	5.903
18	8	somatosensory-abrupt	learning	naive	8.784
19	8	somatosensory-abrupt	learning	naive	2.254
20	8	somatosensory-abrupt	learning	naive	11.572
21	8	somatosensory-abrupt	learning	naive	9.709
22	8	somatosensory-abrupt	learning	naive	6.333
23	8	somatosensory-abrupt	learning	naive	-2.466
24	8	somatosensory-abrupt	learning	naive	1.128
25	8	somatosensory-abrupt	learning	naive	13.266
26	8	somatosensory-abrupt	learning	naive	2.838
27	8	somatosensory-abrupt	learning	naive	-1.012
28	8	somatosensory-abrupt	learning	naive	-0.283
29	8	somatosensory-abrupt	learning	naive	1.403
30	8	somatosensory-abrupt	learning	naive	4.782
31	8	somatosensory-abrupt	learning	naive	9.695
32	8	somatosensory-abrupt	learning	naive	-1.032
33	8	somatosensory-abrupt	learning	naive	3.997
34	8	somatosensory-abrupt	learning	naive	6.046
35	8	somatosensory-abrupt	learning	naive	4.392
36	8	somatosensory-abrupt	learning	naive	1.641
37	8	somatosensory-abrupt	learning	naive	3.196
38	8	somatosensory-abrupt	learning	naive	6.524
39	8	somatosensory-abrupt	learning	naive	3.206
40	8	somatosensory-abrupt	learning	naive	-0.656
41	8	somatosensory-abrupt	learning	naive	3.643
42	8	somatosensory-abrupt	learning	naive	8.512
43	8	somatosensory-abrupt	learning	naive	1.807
44	8	somatosensory-abrupt	learning	naive	1.225
45	8	somatosensory-abrupt	learning	naive	2.907
46	8	somatosensory-abrupt	learning	naive	0.988
47	8	somatosensory-abrupt	learning	naive	-1.325
48	8	somatosensory-abrupt	learning	naive	-0.792
49	8	somatosensory-abrupt	learning	naive	2.304
50	8	somatosensory-abrupt	learning	naive	0.788
51	8	somatosensory-abrupt	learning	naive	6.883
52	8	somatosensory-abrupt	learning	naive	8.199
53	8	somatosensory-abrupt	learning	naive	-4.291
54	8	somatosensory-abrupt	learning	naive	5.945
56	8	somatosensory-abrupt	learning	naive	1.393
57	8	somatosensory-abrupt	learning	naive	5.907
58	8	somatosensory-abrupt	learning	naive	1.81
59	8	somatosensory-abrupt	learning	naive	-1.255
60	8	somatosensory-abrupt	learning	naive	2.586
61	8	somatosensory-abrupt	learning	naive	1.616
62	8	somatosensory-abrupt	learning	naive	-0.386
63	8	somatosensory-abrupt	learning	naive	0.543
64	8	somatosensory-abrupt	learning	naive	1.502
65	8	somatosensory-abrupt	learning	naive	0.655
66	8	somatosensory-abrupt	learning	naive	-6.675
67	8	somatosensory-abrupt	learning	naive	7.707
68	8	somatosensory-abrupt	learning	naive	2.874
69	8	somatosensory-abrupt	learning	naive	-7.095
70	8	somatosensory-abrupt	learning	naive	3.816
71	8	somatosensory-abrupt	learning	naive	6.062
72	8	somatosensory-abrupt	learning	naive	2.187
73	8	somatosensory-abrupt	learning	naive	-2.56
74	8	somatosensory-abrupt	learning	naive	-3.292
75	8	somatosensory-abrupt	learning	naive	3.263
76	8	somatosensory-abrupt	learning	naive	-0.636
77	8	somatosensory-abrupt	learning	naive	1.73
78	8	somatosensory-abrupt	learning	naive	0.399
79	8	somatosensory-abrupt	learning	naive	-11.06
80	8	somatosensory-abrupt	learning	naive	10.655
81	8	somatosensory-abrupt	learning	naive	-3.002
82	8	somatosensory-abrupt	learning	naive	-2.828
83	8	somatosensory-abrupt	learning	naive	5.666
84	8	somatosensory-abrupt	learning	naive	5.397
86	8	somatosensory-abrupt	learning	naive	2.764
87	8	somatosensory-abrupt	learning	naive	-5.645
88	8	somatosensory-abrupt	learning	naive	8.299
89	8	somatosensory-abrupt	learning	naive	-5.191
90	8	somatosensory-abrupt	learning	naive	0.831
91	8	somatosensory-abrupt	learning	naive	-1.804
92	8	somatosensory-abrupt	learning	naive	-5.111
93	8	somatosensory-abrupt	learning	naive	5.497
94	8	somatosensory-abrupt	learning	naive	3.087
95	8	somatosensory-abrupt	learning	naive	-5.375
96	8	somatosensory-abrupt	learning	naive	-0.256
97	8	somatosensory-abrupt	learning	naive	-7.056
98	8	somatosensory-abrupt	learning	naive	-3.931
99	8	somatosensory-abrupt	learning	naive	2.995
100	8	somatosensory-abrupt	learning	naive	5.891
101	8	somatosensory-abrupt	learning	naive	-3.398
102	8	somatosensory-abrupt	learning	naive	4.814
103	8	somatosensory-abrupt	learning	naive	1.066
104	8	somatosensory-abrupt	learning	naive	2.38
105	8	somatosensory-abrupt	learning	naive	-1.69
106	8	somatosensory-abrupt	learning	naive	2.474
107	8	somatosensory-abrupt	learning	naive	-0.773
108	8	somatosensory-abrupt	learning	naive	2.368
109	8	somatosensory-abrupt	learning	naive	4.561
110	8	somatosensory-abrupt	learning	naive	-6.774
111	8	somatosensory-abrupt	learning	naive	-2.879
112	8	somatosensory-abrupt	learning	naive	-3.826
113	8	somatosensory-abrupt	learning	naive	2.552
114	8	somatosensory-abrupt	learning	naive	1.384
116	8	somatosensory-abrupt	learning	naive	33.253
117	8	somatosensory-abrupt	learning	naive	1.54
118	8	somatosensory-abrupt	learning	naive	-6.009
119	8	somatosensory-abrupt	learning	naive	-2.175
120	8	somatosensory-abrupt	learning	naive	4.055
121	8	somatosensory-abrupt	learning	naive	-7.653
122	8	somatosensory-abrupt	learning	naive	-7.672
123	8	somatosensory-abrupt	learning	naive	1.986
124	8	somatosensory-abrupt	learning	naive	-0.86
125	8	somatosensory-abrupt	learning	naive	-3.312
126	8	somatosensory-abrupt	learning	naive	2.687
127	8	somatosensory-abrupt	learning	naive	0.226
128	8	somatosensory-abrupt	learning	naive	1.131
129	8	somatosensory-abrupt	learning	naive	3.302
130	8	somatosensory-abrupt	learning	naive	-7.88
131	8	somatosensory-abrupt	learning	naive	2.018
132	8	somatosensory-abrupt	learning	naive	0.013
133	8	somatosensory-abrupt	learning	naive	5.59
134	8	somatosensory-abrupt	learning	naive	-7.07
135	8	somatosensory-abrupt	learning	naive	5.811
136	8	somatosensory-abrupt	learning	naive	-1.279
137	8	somatosensory-abrupt	learning	naive	-3.27
138	8	somatosensory-abrupt	learning	naive	-1.639
139	8	somatosensory-abrupt	learning	naive	2.234
140	8	somatosensory-abrupt	learning	naive	0.447
141	8	somatosensory-abrupt	learning	naive	-3.993
142	8	somatosensory-abrupt	learning	naive	5.266
143	8	somatosensory-abrupt	learning	naive	-2.426
144	8	somatosensory-abrupt	learning	naive	0.202
146	8	somatosensory-abrupt	learning	naive	9.938
147	8	somatosensory-abrupt	learning	naive	-7.752
148	8	somatosensory-abrupt	learning	naive	-0.662
149	8	somatosensory-abrupt	learning	naive	1.95
151	8	somatosensory-abrupt	learning	naive	-1.545
152	8	somatosensory-abrupt	learning	naive	-3.551
153	8	somatosensory-abrupt	learning	naive	0.737
154	8	somatosensory-abrupt	learning	naive	-3.781
155	8	somatosensory-abrupt	learning	naive	4.85
6	10	sham-abrupt	learning	naive	8.775
7	10	sham-abrupt	learning	naive	23.453
8	10	sham-abrupt	learning	naive	13.387
9	10	sham-abrupt	learning	naive	15.178
11	10	sham-abrupt	learning	naive	2.326
12	10	sham-abrupt	learning	naive	12.984
13	10	sham-abrupt	learning	naive	6.185
14	10	sham-abrupt	learning	naive	12.034
15	10	sham-abrupt	learning	naive	6.273
16	10	sham-abrupt	learning	naive	10.078
17	10	sham-abrupt	learning	naive	9.407
18	10	sham-abrupt	learning	naive	5.419
19	10	sham-abrupt	learning	naive	4.335
20	10	sham-abrupt	learning	naive	6.387
21	10	sham-abrupt	learning	naive	3.822
22	10	sham-abrupt	learning	naive	1.53
23	10	sham-abrupt	learning	naive	3.648
24	10	sham-abrupt	learning	naive	0.801
25	10	sham-abrupt	learning	naive	2.684
26	10	sham-abrupt	learning	naive	3.772
27	10	sham-abrupt	learning	naive	-2.368
28	10	sham-abrupt	learning	naive	5.155
29	10	sham-abrupt	learning	naive	1.832
30	10	sham-abrupt	learning	naive	-2.973
31	10	sham-abrupt	learning	naive	7.329
32	10	sham-abrupt	learning	naive	1.539
33	10	sham-abrupt	learning	naive	-0.787
34	10	sham-abrupt	learning	naive	2.343
35	10	sham-abrupt	learning	naive	-0.203
36	10	sham-abrupt	learning	naive	5.534
37	10	sham-abrupt	learning	naive	-0.173
38	10	sham-abrupt	learning	naive	2.705
39	10	sham-abrupt	learning	naive	-1.894
40	10	sham-abrupt	learning	naive	1.775
41	10	sham-abrupt	learning	naive	0.396
42	10	sham-abrupt	learning	naive	-4.397
43	10	sham-abrupt	learning	naive	-0.818
44	10	sham-abrupt	learning	naive	8.026
45	10	sham-abrupt	learning	naive	0.115
46	10	sham-abrupt	learning	naive	-2.17
47	10	sham-abrupt	learning	naive	5.52
48	10	sham-abrupt	learning	naive	1.069
49	10	sham-abrupt	learning	naive	0.621
50	10	sham-abrupt	learning	naive	1.46
51	10	sham-abrupt	learning	naive	4.969
52	10	sham-abrupt	learning	naive	9.322
53	10	sham-abrupt	learning	naive	1.178
54	10	sham-abrupt	learning	naive	4.366
56	10	sham-abrupt	learning	naive	0.847
57	10	sham-abrupt	learning	naive	1.138
58	10	sham-abrupt	learning	naive	-3.104
59	10	sham-abrupt	learning	naive	5.11
60	10	sham-abrupt	learning	naive	5.432
61	10	sham-abrupt	learning	naive	0.747
62	10	sham-abrupt	learning	naive	3.211
63	10	sham-abrupt	learning	naive	3.696
64	10	sham-abrupt	learning	naive	0.334
65	10	sham-abrupt	learning	naive	3.32
66	10	sham-abrupt	learning	naive	1.839
67	10	sham-abrupt	learning	naive	1.705
68	10	sham-abrupt	learning	naive	1.337
69	10	sham-abrupt	learning	naive	1.914
70	10	sham-abrupt	learning	naive	-0.468
71	10	sham-abrupt	learning	naive	7.764
72	10	sham-abrupt	learning	naive	3.655
73	10	sham-abrupt	learning	naive	1.864
74	10	sham-abrupt	learning	naive	5.181
75	10	sham-abrupt	learning	naive	-5.167
76	10	sham-abrupt	learning	naive	6.14
77	10	sham-abrupt	learning	naive	5.824
78	10	sham-abrupt	learning	naive	-5.581
79	10	sham-abrupt	learning	naive	3.273
80	10	sham-abrupt	learning	naive	2.109
81	10	sham-abrupt	learning	naive	7.667
82	10	sham-abrupt	learning	naive	-3.512
83	10	sham-abrupt	learning	naive	-1.103
84	10	sham-abrupt	learning	naive	0.72
86	10	sham-abrupt	learning	naive	4.073
87	10	sham-abrupt	learning	naive	3.697
88	10	sham-abrupt	learning	naive	-0.544
89	10	sham-abrupt	learning	naive	-1.014
90	10	sham-abrupt	learning	naive	-6.454
91	10	sham-abrupt	learning	naive	3.867
92	10	sham-abrupt	learning	naive	-1.5
93	10	sham-abrupt	learning	naive	5.335
94	10	sham-abrupt	learning	naive	5.039
95	10	sham-abrupt	learning	naive	-0.6
96	10	sham-abrupt	learning	naive	-2.63
97	10	sham-abrupt	learning	naive	-2.84
98	10	sham-abrupt	learning	naive	-0.254
99	10	sham-abrupt	learning	naive	-1.416
100	10	sham-abrupt	learning	naive	2.738
101	10	sham-abrupt	learning	naive	-0.114
102	10	sham-abrupt	learning	naive	0.485
103	10	sham-abrupt	learning	naive	-2.883
104	10	sham-abrupt	learning	naive	-4.044
105	10	sham-abrupt	learning	naive	-2.74
106	10	sham-abrupt	learning	naive	-2.31
107	10	sham-abrupt	learning	naive	-3.247
108	10	sham-abrupt	learning	naive	0.477
109	10	sham-abrupt	learning	naive	0.017
110	10	sham-abrupt	learning	naive	4.889
111	10	sham-abrupt	learning	naive	-3.317
112	10	sham-abrupt	learning	naive	-2.495
113	10	sham-abrupt	learning	naive	-2.48
114	10	sham-abrupt	learning	naive	3.409
116	10	sham-abrupt	learning	naive	5.359
117	10	sham-abrupt	learning	naive	1.061
118	10	sham-abrupt	learning	naive	-1.7
119	10	sham-abrupt	learning	naive	-0.795
120	10	sham-abrupt	learning	naive	2.293
121	10	sham-abrupt	learning	naive	0.39
122	10	sham-abrupt	learning	naive	0.448
123	10	sham-abrupt	learning	naive	2.737
124	10	sham-abrupt	learning	naive	-5.255
125	10	sham-abrupt	learning	naive	-5.351
126	10	sham-abrupt	learning	naive	-7.442
127	10	sham-abrupt	learning	naive	-1.2
128	10	sham-abrupt	learning	naive	-0.25
129	10	sham-abrupt	learning	naive	2.505
130	10	sham-abrupt	learning	naive	-9.396
131	10	sham-abrupt	learning	naive	-3.792
132	10	sham-abrupt	learning	naive	-3.239
133	10	sham-abrupt	learning	naive	-2.605
134	10	sham-abrupt	learning	naive	2.214
135	10	sham-abrupt	learning	naive	-4.607
136	10	sham-abrupt	learning	naive	-4.833
137	10	sham-abrupt	learning	naive	3.781
138	10	sham-abrupt	learning	naive	-3.125
139	10	sham-abrupt	learning	naive	-5.096
140	10	sham-abrupt	learning	naive	-1.841
141	10	sham-abrupt	learning	naive	-9.071
142	10	sham-abrupt	learning	naive	1.449
143	10	sham-abrupt	learning	naive	0.027
144	10	sham-abrupt	learning	naive	0.406
146	10	sham-abrupt	learning	naive	-0.22
147	10	sham-abrupt	learning	naive	-4.568
148	10	sham-abrupt	learning	naive	-4.799
149	10	sham-abrupt	learning	naive	-1.532
151	10	sham-abrupt	learning	naive	4.748
152	10	sham-abrupt	learning	naive	-5.116
153	10	sham-abrupt	learning	naive	-3.599
154	10	sham-abrupt	learning	naive	-1.562
155	10	sham-abrupt	learning	naive	0.569
6	11	sham-abrupt	learning	naive	19.421
7	11	sham-abrupt	learning	naive	11.573
8	11	sham-abrupt	learning	naive	14.709
9	11	sham-abrupt	learning	naive	11.224
11	11	sham-abrupt	learning	naive	13.683
12	11	sham-abrupt	learning	naive	10.584
13	11	sham-abrupt	learning	naive	10.664
14	11	sham-abrupt	learning	naive	11.725
15	11	sham-abrupt	learning	naive	4.819
16	11	sham-abrupt	learning	naive	1.767
17	11	sham-abrupt	learning	naive	6.286
18	11	sham-abrupt	learning	naive	5.003
19	11	sham-abrupt	learning	naive	5.735
20	11	sham-abrupt	learning	naive	9.242
21	11	sham-abrupt	learning	naive	4.501
22	11	sham-abrupt	learning	naive	20.961
23	11	sham-abrupt	learning	naive	9.407
24	11	sham-abrupt	learning	naive	7.272
25	11	sham-abrupt	learning	naive	2.729
26	11	sham-abrupt	learning	naive	2.079
27	11	sham-abrupt	learning	naive	8.451
28	11	sham-abrupt	learning	naive	-1.931
29	11	sham-abrupt	learning	naive	12.654
30	11	sham-abrupt	learning	naive	3.915
31	11	sham-abrupt	learning	naive	8.798
32	11	sham-abrupt	learning	naive	-2.384
33	11	sham-abrupt	learning	naive	9.109
34	11	sham-abrupt	learning	naive	5.22
35	11	sham-abrupt	learning	naive	4.188
36	11	sham-abrupt	learning	naive	9.515
37	11	sham-abrupt	learning	naive	3.22
38	11	sham-abrupt	learning	naive	2.755
39	11	sham-abrupt	learning	naive	17.268
40	11	sham-abrupt	learning	naive	8.938
41	11	sham-abrupt	learning	naive	5.182
42	11	sham-abrupt	learning	naive	5.684
43	11	sham-abrupt	learning	naive	10.758
44	11	sham-abrupt	learning	naive	5.536
45	11	sham-abrupt	learning	naive	2.761
46	11	sham-abrupt	learning	naive	5.575
47	11	sham-abrupt	learning	naive	1.434
48	11	sham-abrupt	learning	naive	15.018
49	11	sham-abrupt	learning	naive	11.329
50	11	sham-abrupt	learning	naive	9.412
51	11	sham-abrupt	learning	naive	5.529
52	11	sham-abrupt	learning	naive	2.903
53	11	sham-abrupt	learning	naive	6.123
54	11	sham-abrupt	learning	naive	0.649
56	11	sham-abrupt	learning	naive	15.525
57	11	sham-abrupt	learning	naive	11.836
58	11	sham-abrupt	learning	naive	13.9
59	11	sham-abrupt	learning	naive	2.348
60	11	sham-abrupt	learning	naive	7.433
61	11	sham-abrupt	learning	naive	-3.93
62	11	sham-abrupt	learning	naive	3.628
63	11	sham-abrupt	learning	naive	-1.084
64	11	sham-abrupt	learning	naive	6.013
65	11	sham-abrupt	learning	naive	15.142
66	11	sham-abrupt	learning	naive	-2.61
67	11	sham-abrupt	learning	naive	-4.53
68	11	sham-abrupt	learning	naive	-0.454
69	11	sham-abrupt	learning	naive	0.956
70	11	sham-abrupt	learning	naive	4.931
71	11	sham-abrupt	learning	naive	4.144
72	11	sham-abrupt	learning	naive	4.926
73	11	sham-abrupt	learning	naive	12.766
74	11	sham-abrupt	learning	naive	-9.17
75	11	sham-abrupt	learning	naive	11.37
76	11	sham-abrupt	learning	naive	5.086
77	11	sham-abrupt	learning	naive	3.831
78	11	sham-abrupt	learning	naive	-3.565
79	11	sham-abrupt	learning	naive	11.719
80	11	sham-abrupt	learning	naive	1.173
81	11	sham-abrupt	learning	naive	9.596
82	11	sham-abrupt	learning	naive	2.278
83	11	sham-abrupt	learning	naive	-6.929
84	11	sham-abrupt	learning	naive	0.835
86	11	sham-abrupt	learning	naive	10.272
87	11	sham-abrupt	learning	naive	1.34
88	11	sham-abrupt	learning	naive	7.617
89	11	sham-abrupt	learning	naive	1.149
90	11	sham-abrupt	learning	naive	7.68
91	11	sham-abrupt	learning	naive	0.153
92	11	sham-abrupt	learning	naive	10.66
93	11	sham-abrupt	learning	naive	8.639
94	11	sham-abrupt	learning	naive	5.812
95	11	sham-abrupt	learning	naive	7.582
96	11	sham-abrupt	learning	naive	4.038
97	11	sham-abrupt	learning	naive	8.816
98	11	sham-abrupt	learning	naive	6.936
99	11	sham-abrupt	learning	naive	4.054
100	11	sham-abrupt	learning	naive	6.832
101	11	sham-abrupt	learning	naive	1.116
102	11	sham-abrupt	learning	naive	3.179
103	11	sham-abrupt	learning	naive	-7.246
104	11	sham-abrupt	learning	naive	-0.262
105	11	sham-abrupt	learning	naive	4.711
106	11	sham-abrupt	learning	naive	8.668
107	11	sham-abrupt	learning	naive	-12.078
108	11	sham-abrupt	learning	naive	7.292
109	11	sham-abrupt	learning	naive	-6.493
110	11	sham-abrupt	learning	naive	8.178
111	11	sham-abrupt	learning	naive	5.898
112	11	sham-abrupt	learning	naive	7.203
113	11	sham-abrupt	learning	naive	-8.557
114	11	sham-abrupt	learning	naive	7.921
116	11	sham-abrupt	learning	naive	11.539
117	11	sham-abrupt	learning	naive	8.51
118	11	sham-abrupt	learning	naive	-0.128
119	11	sham-abrupt	learning	naive	5.932
120	11	sham-abrupt	learning	naive	2.162
121	11	sham-abrupt	learning	naive	-0.318
122	11	sham-abrupt	learning	naive	10.518
123	11	sham-abrupt	learning	naive	6.108
124	11	sham-abrupt	learning	naive	1.278
125	11	sham-abrupt	learning	naive	4.656
126	11	sham-abrupt	learning	naive	-0.604
127	11	sham-abrupt	learning	naive	-0.254
128	11	sham-abrupt	learning	naive	6.291
129	11	sham-abrupt	learning	naive	1.88
130	11	sham-abrupt	learning	naive	-4.764
131	11	sham-abrupt	learning	naive	4.357
132	11	sham-abrupt	learning	naive	9.681
133	11	sham-abrupt	learning	naive	-6.633
134	11	sham-abrupt	learning	naive	3.678
135	11	sham-abrupt	learning	naive	0.832
136	11	sham-abrupt	learning	naive	0.872
137	11	sham-abrupt	learning	naive	0.04
138	11	sham-abrupt	learning	naive	0.122
139	11	sham-abrupt	learning	naive	2.512
140	11	sham-abrupt	learning	naive	0.152
141	11	sham-abrupt	learning	naive	9.339
142	11	sham-abrupt	learning	naive	8.33
143	11	sham-abrupt	learning	naive	-0.708
144	11	sham-abrupt	learning	naive	0.547
146	11	sham-abrupt	learning	naive	4.992
147	11	sham-abrupt	learning	naive	-4.215
148	11	sham-abrupt	learning	naive	3.77
149	11	sham-abrupt	learning	naive	7.626
151	11	sham-abrupt	learning	naive	4.953
152	11	sham-abrupt	learning	naive	-2.942
153	11	sham-abrupt	learning	naive	3.766
154	11	sham-abrupt	learning	naive	5.452
155	11	sham-abrupt	learning	naive	13.831
6	12	somatosensory-abrupt	learning	naive	23.337
7	12	somatosensory-abrupt	learning	naive	12.332
8	12	somatosensory-abrupt	learning	naive	5.974
9	12	somatosensory-abrupt	learning	naive	8.856
11	12	somatosensory-abrupt	learning	naive	0.969
12	12	somatosensory-abrupt	learning	naive	3.919
13	12	somatosensory-abrupt	learning	naive	9.147
14	12	somatosensory-abrupt	learning	naive	3.55
15	12	somatosensory-abrupt	learning	naive	9.215
16	12	somatosensory-abrupt	learning	naive	8.401
17	12	somatosensory-abrupt	learning	naive	-1.247
18	12	somatosensory-abrupt	learning	naive	8.97
19	12	somatosensory-abrupt	learning	naive	14.897
20	12	somatosensory-abrupt	learning	naive	-0.743
21	12	somatosensory-abrupt	learning	naive	7.192
22	12	somatosensory-abrupt	learning	naive	8.231
23	12	somatosensory-abrupt	learning	naive	9.221
24	12	somatosensory-abrupt	learning	naive	8.766
25	12	somatosensory-abrupt	learning	naive	4.013
26	12	somatosensory-abrupt	learning	naive	10.464
27	12	somatosensory-abrupt	learning	naive	3.206
28	12	somatosensory-abrupt	learning	naive	2.522
29	12	somatosensory-abrupt	learning	naive	2.897
30	12	somatosensory-abrupt	learning	naive	2.113
31	12	somatosensory-abrupt	learning	naive	2.422
32	12	somatosensory-abrupt	learning	naive	6.232
33	12	somatosensory-abrupt	learning	naive	5.582
34	12	somatosensory-abrupt	learning	naive	3.9
35	12	somatosensory-abrupt	learning	naive	6.269
36	12	somatosensory-abrupt	learning	naive	5.684
37	12	somatosensory-abrupt	learning	naive	4.653
38	12	somatosensory-abrupt	learning	naive	6.609
39	12	somatosensory-abrupt	learning	naive	3.2
40	12	somatosensory-abrupt	learning	naive	4.487
41	12	somatosensory-abrupt	learning	naive	4.035
42	12	somatosensory-abrupt	learning	naive	6.634
43	12	somatosensory-abrupt	learning	naive	-0.325
44	12	somatosensory-abrupt	learning	naive	5.821
45	12	somatosensory-abrupt	learning	naive	6.943
46	12	somatosensory-abrupt	learning	naive	-1.072
47	12	somatosensory-abrupt	learning	naive	10.58
48	12	somatosensory-abrupt	learning	naive	5.301
49	12	somatosensory-abrupt	learning	naive	2.902
50	12	somatosensory-abrupt	learning	naive	0.247
51	12	somatosensory-abrupt	learning	naive	3.8
52	12	somatosensory-abrupt	learning	naive	3.721
53	12	somatosensory-abrupt	learning	naive	-1.136
54	12	somatosensory-abrupt	learning	naive	4.799
56	12	somatosensory-abrupt	learning	naive	5.89
57	12	somatosensory-abrupt	learning	naive	6.983
58	12	somatosensory-abrupt	learning	naive	9.708
59	12	somatosensory-abrupt	learning	naive	7.066
60	12	somatosensory-abrupt	learning	naive	5.031
61	12	somatosensory-abrupt	learning	naive	5.645
62	12	somatosensory-abrupt	learning	naive	5.044
63	12	somatosensory-abrupt	learning	naive	6.87
64	12	somatosensory-abrupt	learning	naive	1.942
65	12	somatosensory-abrupt	learning	naive	5.814
66	12	somatosensory-abrupt	learning	naive	1.907
67	12	somatosensory-abrupt	learning	naive	5.151
68	12	somatosensory-abrupt	learning	naive	2.845
69	12	somatosensory-abrupt	learning	naive	5.796
70	12	somatosensory-abrupt	learning	naive	1.134
71	12	somatosensory-abrupt	learning	naive	4.555
72	12	somatosensory-abrupt	learning	naive	2.643
73	12	somatosensory-abrupt	learning	naive	3.499
74	12	somatosensory-abrupt	learning	naive	6.703
75	12	somatosensory-abrupt	learning	naive	1.062
76	12	somatosensory-abrupt	learning	naive	3.677
77	12	somatosensory-abrupt	learning	naive	4.836
78	12	somatosensory-abrupt	learning	naive	2.759
79	12	somatosensory-abrupt	learning	naive	5.293
80	12	somatosensory-abrupt	learning	naive	2.454
81	12	somatosensory-abrupt	learning	naive	1.603
82	12	somatosensory-abrupt	learning	naive	5.515
83	12	somatosensory-abrupt	learning	naive	1.919
84	12	somatosensory-abrupt	learning	naive	-0.271
86	12	somatosensory-abrupt	learning	naive	-0.298
87	12	somatosensory-abrupt	learning	naive	1.273
88	12	somatosensory-abrupt	learning	naive	-0.644
89	12	somatosensory-abrupt	learning	naive	2.133
90	12	somatosensory-abrupt	learning	naive	-4.542
91	12	somatosensory-abrupt	learning	naive	-0.536
92	12	somatosensory-abrupt	learning	naive	-1.961
93	12	somatosensory-abrupt	learning	naive	-5.668
94	12	somatosensory-abrupt	learning	naive	4.817
95	12	somatosensory-abrupt	learning	naive	-2.39
96	12	somatosensory-abrupt	learning	naive	-1.927
97	12	somatosensory-abrupt	learning	naive	-2.631
98	12	somatosensory-abrupt	learning	naive	5.504
99	12	somatosensory-abrupt	learning	naive	0.07
100	12	somatosensory-abrupt	learning	naive	-1.168
101	12	somatosensory-abrupt	learning	naive	-0.814
102	12	somatosensory-abrupt	learning	naive	-0.833
103	12	somatosensory-abrupt	learning	naive	1.493
104	12	somatosensory-abrupt	learning	naive	-0.982
105	12	somatosensory-abrupt	learning	naive	4.508
106	12	somatosensory-abrupt	learning	naive	2.795
107	12	somatosensory-abrupt	learning	naive	-1.203
108	12	somatosensory-abrupt	learning	naive	-1.117
109	12	somatosensory-abrupt	learning	naive	1.452
110	12	somatosensory-abrupt	learning	naive	-5.757
111	12	somatosensory-abrupt	learning	naive	-3.143
112	12	somatosensory-abrupt	learning	naive	-0.011
113	12	somatosensory-abrupt	learning	naive	0.567
114	12	somatosensory-abrupt	learning	naive	-2.137
116	12	somatosensory-abrupt	learning	naive	-5.026
117	12	somatosensory-abrupt	learning	naive	-4.035
118	12	somatosensory-abrupt	learning	naive	-7.835
119	12	somatosensory-abrupt	learning	naive	2.626
120	12	somatosensory-abrupt	learning	naive	1.957
121	12	somatosensory-abrupt	learning	naive	-4.616
122	12	somatosensory-abrupt	learning	naive	3.523
123	12	somatosensory-abrupt	learning	naive	0.367
124	12	somatosensory-abrupt	learning	naive	1.516
125	12	somatosensory-abrupt	learning	naive	3.196
126	12	somatosensory-abrupt	learning	naive	-2.118
127	12	somatosensory-abrupt	learning	naive	-3.483
128	12	somatosensory-abrupt	learning	naive	-5.353
129	12	somatosensory-abrupt	learning	naive	0.788
130	12	somatosensory-abrupt	learning	naive	0.511
131	12	somatosensory-abrupt	learning	naive	-0.483
132	12	somatosensory-abrupt	learning	naive	-0.41
133	12	somatosensory-abrupt	learning	naive	4.3
134	12	somatosensory-abrupt	learning	naive	-0.201
135	12	somatosensory-abrupt	learning	naive	-1.776
136	12	somatosensory-abrupt	learning	naive	-1.37
137	12	somatosensory-abrupt	learning	naive	-0.729
138	12	somatosensory-abrupt	learning	naive	1.113
139	12	somatosensory-abrupt	learning	naive	-0.906
140	12	somatosensory-abrupt	learning	naive	-1.08
141	12	somatosensory-abrupt	learning	naive	-3.633
142	12	somatosensory-abrupt	learning	naive	4.24
143	12	somatosensory-abrupt	learning	naive	-0.65
144	12	somatosensory-abrupt	learning	naive	2.234
146	12	somatosensory-abrupt	learning	naive	2.562
147	12	somatosensory-abrupt	learning	naive	2.83
148	12	somatosensory-abrupt	learning	naive	0.783
149	12	somatosensory-abrupt	learning	naive	-2.401
151	12	somatosensory-abrupt	learning	naive	-0.374
152	12	somatosensory-abrupt	learning	naive	0.632
153	12	somatosensory-abrupt	learning	naive	-3.257
154	12	somatosensory-abrupt	learning	naive	-2.529
155	12	somatosensory-abrupt	learning	naive	2.195
6	22	somatosensory-abrupt	learning	naive	22.414
7	22	somatosensory-abrupt	learning	naive	18.514
8	22	somatosensory-abrupt	learning	naive	11.073
9	22	somatosensory-abrupt	learning	naive	11.518
11	22	somatosensory-abrupt	learning	naive	18.713
12	22	somatosensory-abrupt	learning	naive	9.007
13	22	somatosensory-abrupt	learning	naive	14.226
14	22	somatosensory-abrupt	learning	naive	14.767
15	22	somatosensory-abrupt	learning	naive	17.47
16	22	somatosensory-abrupt	learning	naive	7.489
17	22	somatosensory-abrupt	learning	naive	12.058
18	22	somatosensory-abrupt	learning	naive	4.566
19	22	somatosensory-abrupt	learning	naive	12.049
20	22	somatosensory-abrupt	learning	naive	11.511
21	22	somatosensory-abrupt	learning	naive	14.393
22	22	somatosensory-abrupt	learning	naive	8.252
23	22	somatosensory-abrupt	learning	naive	0.964
24	22	somatosensory-abrupt	learning	naive	3.44
25	22	somatosensory-abrupt	learning	naive	4.693
26	22	somatosensory-abrupt	learning	naive	9.677
27	22	somatosensory-abrupt	learning	naive	2.759
28	22	somatosensory-abrupt	learning	naive	7.954
29	22	somatosensory-abrupt	learning	naive	3.943
30	22	somatosensory-abrupt	learning	naive	0.064
31	22	somatosensory-abrupt	learning	naive	7.415
32	22	somatosensory-abrupt	learning	naive	-4.346
33	22	somatosensory-abrupt	learning	naive	8.462
34	22	somatosensory-abrupt	learning	naive	-1.944
35	22	somatosensory-abrupt	learning	naive	7.744
36	22	somatosensory-abrupt	learning	naive	6.317
37	22	somatosensory-abrupt	learning	naive	7.091
38	22	somatosensory-abrupt	learning	naive	3.32
39	22	somatosensory-abrupt	learning	naive	9.213
40	22	somatosensory-abrupt	learning	naive	-2.462
41	22	somatosensory-abrupt	learning	naive	-2.024
42	22	somatosensory-abrupt	learning	naive	5.545
43	22	somatosensory-abrupt	learning	naive	3.11
44	22	somatosensory-abrupt	learning	naive	5.271
45	22	somatosensory-abrupt	learning	naive	5.959
46	22	somatosensory-abrupt	learning	naive	7.417
47	22	somatosensory-abrupt	learning	naive	-1.657
48	22	somatosensory-abrupt	learning	naive	0.156
49	22	somatosensory-abrupt	learning	naive	0.793
50	22	somatosensory-abrupt	learning	naive	-4.734
51	22	somatosensory-abrupt	learning	naive	-6.973
52	22	somatosensory-abrupt	learning	naive	7.288
53	22	somatosensory-abrupt	learning	naive	1.246
54	22	somatosensory-abrupt	learning	naive	-2.936
56	22	somatosensory-abrupt	learning	naive	5.474
57	22	somatosensory-abrupt	learning	naive	7.311
58	22	somatosensory-abrupt	learning	naive	-2.05
59	22	somatosensory-abrupt	learning	naive	-3.266
60	22	somatosensory-abrupt	learning	naive	7.928
61	22	somatosensory-abrupt	learning	naive	-3.708
62	22	somatosensory-abrupt	learning	naive	-10.636
63	22	somatosensory-abrupt	learning	naive	5.855
64	22	somatosensory-abrupt	learning	naive	-7.374
65	22	somatosensory-abrupt	learning	naive	14.971
66	22	somatosensory-abrupt	learning	naive	2.529
67	22	somatosensory-abrupt	learning	naive	-3.148
68	22	somatosensory-abrupt	learning	naive	0.551
69	22	somatosensory-abrupt	learning	naive	3.433
70	22	somatosensory-abrupt	learning	naive	-2.486
71	22	somatosensory-abrupt	learning	naive	6.963
72	22	somatosensory-abrupt	learning	naive	-6.421
73	22	somatosensory-abrupt	learning	naive	-0.501
74	22	somatosensory-abrupt	learning	naive	9.579
75	22	somatosensory-abrupt	learning	naive	-2.4
76	22	somatosensory-abrupt	learning	naive	-2.417
77	22	somatosensory-abrupt	learning	naive	6.621
78	22	somatosensory-abrupt	learning	naive	2.571
79	22	somatosensory-abrupt	learning	naive	-5.138
80	22	somatosensory-abrupt	learning	naive	5.329
81	22	somatosensory-abrupt	learning	naive	-3.237
82	22	somatosensory-abrupt	learning	naive	12.27
83	22	somatosensory-abrupt	learning	naive	-11.527
84	22	somatosensory-abrupt	learning	naive	-0.808
86	22	somatosensory-abrupt	learning	naive	1.862
87	22	somatosensory-abrupt	learning	naive	4.72
88	22	somatosensory-abrupt	learning	naive	-1.188
89	22	somatosensory-abrupt	learning	naive	7.228
90	22	somatosensory-abrupt	learning	naive	0.244
91	22	somatosensory-abrupt	learning	naive	-3.123
92	22	somatosensory-abrupt	learning	naive	0.285
93	22	somatosensory-abrupt	learning	naive	1.289
94	22	somatosensory-abrupt	learning	naive	1.283
95	22	somatosensory-abrupt	learning	naive	-8.42
96	22	somatosensory-abrupt	learning	naive	2.124
97	22	somatosensory-abrupt	learning	naive	7.551
98	22	somatosensory-abrupt	learning	naive	2.039
99	22	somatosensory-abrupt	learning	naive	5.253
100	22	somatosensory-abrupt	learning	naive	13.203
101	22	somatosensory-abrupt	learning	naive	6.772
102	22	somatosensory-abrupt	learning	naive	-2.894
103	22	somatosensory-abrupt	learning	naive	2.478
104	22	somatosensory-abrupt	learning	naive	-5.473
105	22	somatosensory-abrupt	learning	naive	1.57
106	22	somatosensory-abrupt	learning	naive	10.676
107	22	somatosensory-abrupt	learning	naive	3.002
108	22	somatosensory-abrupt	learning	naive	8.902
109	22	somatosensory-abrupt	learning	naive	5.103
110	22	somatosensory-abrupt	learning	naive	-6.141
111	22	somatosensory-abrupt	learning	naive	-2.602
112	22	somatosensory-abrupt	learning	naive	-2.111
113	22	somatosensory-abrupt	learning	naive	2.601
114	22	somatosensory-abrupt	learning	naive	-3.776
116	22	somatosensory-abrupt	learning	naive	3.863
117	22	somatosensory-abrupt	learning	naive	-7.693
118	22	somatosensory-abrupt	learning	naive	13.338
119	22	somatosensory-abrupt	learning	naive	3.052
120	22	somatosensory-abrupt	learning	naive	-4.433
121	22	somatosensory-abrupt	learning	naive	8.55
122	22	somatosensory-abrupt	learning	naive	0.063
123	22	somatosensory-abrupt	learning	naive	5.243
124	22	somatosensory-abrupt	learning	naive	6.702
125	22	somatosensory-abrupt	learning	naive	-4.816
126	22	somatosensory-abrupt	learning	naive	-4.196
127	22	somatosensory-abrupt	learning	naive	-4.626
128	22	somatosensory-abrupt	learning	naive	1.866
129	22	somatosensory-abrupt	learning	naive	10.156
130	22	somatosensory-abrupt	learning	naive	1.591
131	22	somatosensory-abrupt	learning	naive	0.311
132	22	somatosensory-abrupt	learning	naive	3.581
133	22	somatosensory-abrupt	learning	naive	8.64
134	22	somatosensory-abrupt	learning	naive	2.797
135	22	somatosensory-abrupt	learning	naive	1.209
136	22	somatosensory-abrupt	learning	naive	-11.593
137	22	somatosensory-abrupt	learning	naive	6.008
138	22	somatosensory-abrupt	learning	naive	-13.584
139	22	somatosensory-abrupt	learning	naive	-0.813
140	22	somatosensory-abrupt	learning	naive	-5.173
141	22	somatosensory-abrupt	learning	naive	-11.886
142	22	somatosensory-abrupt	learning	naive	9.764
143	22	somatosensory-abrupt	learning	naive	1.304
144	22	somatosensory-abrupt	learning	naive	1.624
146	22	somatosensory-abrupt	learning	naive	2.405
147	22	somatosensory-abrupt	learning	naive	-6.065
148	22	somatosensory-abrupt	learning	naive	-3.621
149	22	somatosensory-abrupt	learning	naive	-4.367
151	22	somatosensory-abrupt	learning	naive	3.548
152	22	somatosensory-abrupt	learning	naive	9.452
153	22	somatosensory-abrupt	learning	naive	-8.076
154	22	somatosensory-abrupt	learning	naive	-1.985
155	22	somatosensory-abrupt	learning	naive	11.404
6	25	somatosensory-abrupt	learning	naive	17.971
7	25	somatosensory-abrupt	learning	naive	21.872
8	25	somatosensory-abrupt	learning	naive	7.881
9	25	somatosensory-abrupt	learning	naive	11.581
11	25	somatosensory-abrupt	learning	naive	8.121
12	25	somatosensory-abrupt	learning	naive	18.67
13	25	somatosensory-abrupt	learning	naive	4.931
14	25	somatosensory-abrupt	learning	naive	11.378
15	25	somatosensory-abrupt	learning	naive	10.196
16	25	somatosensory-abrupt	learning	naive	9.008
17	25	somatosensory-abrupt	learning	naive	13.724
18	25	somatosensory-abrupt	learning	naive	9.625
19	25	somatosensory-abrupt	learning	naive	4.062
20	25	somatosensory-abrupt	learning	naive	2.729
21	25	somatosensory-abrupt	learning	naive	5.399
22	25	somatosensory-abrupt	learning	naive	5.215
23	25	somatosensory-abrupt	learning	naive	3.903
24	25	somatosensory-abrupt	learning	naive	4.877
25	25	somatosensory-abrupt	learning	naive	-0.16
26	25	somatosensory-abrupt	learning	naive	0.505
27	25	somatosensory-abrupt	learning	naive	5.024
28	25	somatosensory-abrupt	learning	naive	5.591
29	25	somatosensory-abrupt	learning	naive	4.784
30	25	somatosensory-abrupt	learning	naive	5.236
31	25	somatosensory-abrupt	learning	naive	2.314
32	25	somatosensory-abrupt	learning	naive	2.206
33	25	somatosensory-abrupt	learning	naive	-1.908
34	25	somatosensory-abrupt	learning	naive	-0.773
35	25	somatosensory-abrupt	learning	naive	3.53
36	25	somatosensory-abrupt	learning	naive	5.429
37	25	somatosensory-abrupt	learning	naive	1.324
38	25	somatosensory-abrupt	learning	naive	1.68
39	25	somatosensory-abrupt	learning	naive	4.849
40	25	somatosensory-abrupt	learning	naive	-2.5
41	25	somatosensory-abrupt	learning	naive	-0.757
42	25	somatosensory-abrupt	learning	naive	-0.65
43	25	somatosensory-abrupt	learning	naive	-9.7
44	25	somatosensory-abrupt	learning	naive	1.039
45	25	somatosensory-abrupt	learning	naive	-0.123
46	25	somatosensory-abrupt	learning	naive	3.916
47	25	somatosensory-abrupt	learning	naive	9.215
48	25	somatosensory-abrupt	learning	naive	2.564
49	25	somatosensory-abrupt	learning	naive	5.41
50	25	somatosensory-abrupt	learning	naive	1.116
51	25	somatosensory-abrupt	learning	naive	-2.066
52	25	somatosensory-abrupt	learning	naive	-3.652
53	25	somatosensory-abrupt	learning	naive	3.876
54	25	somatosensory-abrupt	learning	naive	0.364
56	25	somatosensory-abrupt	learning	naive	6.299
57	25	somatosensory-abrupt	learning	naive	-1.427
58	25	somatosensory-abrupt	learning	naive	3.631
59	25	somatosensory-abrupt	learning	naive	-1.481
60	25	somatosensory-abrupt	learning	naive	4.178
61	25	somatosensory-abrupt	learning	naive	-3.846
62	25	somatosensory-abrupt	learning	naive	4.875
63	25	somatosensory-abrupt	learning	naive	4.984
64	25	somatosensory-abrupt	learning	naive	1.226
65	25	somatosensory-abrupt	learning	naive	4.73
66	25	somatosensory-abrupt	learning	naive	8.968
67	25	somatosensory-abrupt	learning	naive	1.709
68	25	somatosensory-abrupt	learning	naive	-13.967
69	25	somatosensory-abrupt	learning	naive	-3.505
70	25	somatosensory-abrupt	learning	naive	-1.523
71	25	somatosensory-abrupt	learning	naive	5.666
72	25	somatosensory-abrupt	learning	naive	1.067
73	25	somatosensory-abrupt	learning	naive	-2.892
74	25	somatosensory-abrupt	learning	naive	-0.805
75	25	somatosensory-abrupt	learning	naive	-4.747
76	25	somatosensory-abrupt	learning	naive	-7.032
77	25	somatosensory-abrupt	learning	naive	1.449
78	25	somatosensory-abrupt	learning	naive	-1.716
79	25	somatosensory-abrupt	learning	naive	-2.574
80	25	somatosensory-abrupt	learning	naive	-0.251
81	25	somatosensory-abrupt	learning	naive	-10.039
82	25	somatosensory-abrupt	learning	naive	3.607
83	25	somatosensory-abrupt	learning	naive	-1.997
84	25	somatosensory-abrupt	learning	naive	0.735
86	25	somatosensory-abrupt	learning	naive	-3.967
87	25	somatosensory-abrupt	learning	naive	0.028
88	25	somatosensory-abrupt	learning	naive	0.703
89	25	somatosensory-abrupt	learning	naive	10.435
90	25	somatosensory-abrupt	learning	naive	0.851
91	25	somatosensory-abrupt	learning	naive	1.862
92	25	somatosensory-abrupt	learning	naive	4.369
93	25	somatosensory-abrupt	learning	naive	5.36
94	25	somatosensory-abrupt	learning	naive	1.799
95	25	somatosensory-abrupt	learning	naive	7.69
96	25	somatosensory-abrupt	learning	naive	-2.463
97	25	somatosensory-abrupt	learning	naive	-1.288
98	25	somatosensory-abrupt	learning	naive	5.766
99	25	somatosensory-abrupt	learning	naive	3.6
100	25	somatosensory-abrupt	learning	naive	5.144
101	25	somatosensory-abrupt	learning	naive	3.022
102	25	somatosensory-abrupt	learning	naive	6.081
103	25	somatosensory-abrupt	learning	naive	-2.788
104	25	somatosensory-abrupt	learning	naive	3.417
105	25	somatosensory-abrupt	learning	naive	0.843
106	25	somatosensory-abrupt	learning	naive	5.352
107	25	somatosensory-abrupt	learning	naive	3.818
108	25	somatosensory-abrupt	learning	naive	1.831
109	25	somatosensory-abrupt	learning	naive	3.515
110	25	somatosensory-abrupt	learning	naive	0.107
111	25	somatosensory-abrupt	learning	naive	1.229
112	25	somatosensory-abrupt	learning	naive	1.387
113	25	somatosensory-abrupt	learning	naive	2.387
114	25	somatosensory-abrupt	learning	naive	0.704
116	25	somatosensory-abrupt	learning	naive	3.276
117	25	somatosensory-abrupt	learning	naive	11.072
118	25	somatosensory-abrupt	learning	naive	1.066
119	25	somatosensory-abrupt	learning	naive	0.624
120	25	somatosensory-abrupt	learning	naive	7.626
121	25	somatosensory-abrupt	learning	naive	0.213
122	25	somatosensory-abrupt	learning	naive	8.084
123	25	somatosensory-abrupt	learning	naive	3.646
124	25	somatosensory-abrupt	learning	naive	-0.572
125	25	somatosensory-abrupt	learning	naive	11.785
126	25	somatosensory-abrupt	learning	naive	-3.016
127	25	somatosensory-abrupt	learning	naive	-2.274
128	25	somatosensory-abrupt	learning	naive	-0.53
129	25	somatosensory-abrupt	learning	naive	-0.497
130	25	somatosensory-abrupt	learning	naive	0.012
131	25	somatosensory-abrupt	learning	naive	2.186
132	25	somatosensory-abrupt	learning	naive	-0.932
133	25	somatosensory-abrupt	learning	naive	4.849
134	25	somatosensory-abrupt	learning	naive	1.242
135	25	somatosensory-abrupt	learning	naive	1.124
136	25	somatosensory-abrupt	learning	naive	-0.867
137	25	somatosensory-abrupt	learning	naive	3.613
138	25	somatosensory-abrupt	learning	naive	1.077
139	25	somatosensory-abrupt	learning	naive	3.515
140	25	somatosensory-abrupt	learning	naive	1.563
141	25	somatosensory-abrupt	learning	naive	0.926
142	25	somatosensory-abrupt	learning	naive	3.926
143	25	somatosensory-abrupt	learning	naive	0.586
144	25	somatosensory-abrupt	learning	naive	1.941
146	25	somatosensory-abrupt	learning	naive	6.504
147	25	somatosensory-abrupt	learning	naive	-0.938
148	25	somatosensory-abrupt	learning	naive	1.407
149	25	somatosensory-abrupt	learning	naive	2.215
151	25	somatosensory-abrupt	learning	naive	-2.288
152	25	somatosensory-abrupt	learning	naive	6.731
153	25	somatosensory-abrupt	learning	naive	-0.644
154	25	somatosensory-abrupt	learning	naive	6.11
155	25	somatosensory-abrupt	learning	naive	-10.452
6	23	somatosensory-abrupt	learning	naive	20.186
7	23	somatosensory-abrupt	learning	naive	18.632
8	23	somatosensory-abrupt	learning	naive	22.307
9	23	somatosensory-abrupt	learning	naive	17.115
11	23	somatosensory-abrupt	learning	naive	15.521
12	23	somatosensory-abrupt	learning	naive	12.426
13	23	somatosensory-abrupt	learning	naive	10.007
14	23	somatosensory-abrupt	learning	naive	7.963
15	23	somatosensory-abrupt	learning	naive	13.88
16	23	somatosensory-abrupt	learning	naive	12.998
17	23	somatosensory-abrupt	learning	naive	6.925
18	23	somatosensory-abrupt	learning	naive	2.74
19	23	somatosensory-abrupt	learning	naive	9.89
20	23	somatosensory-abrupt	learning	naive	3.76
21	23	somatosensory-abrupt	learning	naive	7.546
22	23	somatosensory-abrupt	learning	naive	12.987
23	23	somatosensory-abrupt	learning	naive	6.713
24	23	somatosensory-abrupt	learning	naive	11.188
25	23	somatosensory-abrupt	learning	naive	-1.887
26	23	somatosensory-abrupt	learning	naive	8.187
27	23	somatosensory-abrupt	learning	naive	4.548
28	23	somatosensory-abrupt	learning	naive	1.001
29	23	somatosensory-abrupt	learning	naive	3.682
30	23	somatosensory-abrupt	learning	naive	7.539
31	23	somatosensory-abrupt	learning	naive	7.58
32	23	somatosensory-abrupt	learning	naive	3.824
33	23	somatosensory-abrupt	learning	naive	3.378
34	23	somatosensory-abrupt	learning	naive	1.681
35	23	somatosensory-abrupt	learning	naive	1.915
36	23	somatosensory-abrupt	learning	naive	-0.575
37	23	somatosensory-abrupt	learning	naive	4.438
38	23	somatosensory-abrupt	learning	naive	2.342
39	23	somatosensory-abrupt	learning	naive	6.87
40	23	somatosensory-abrupt	learning	naive	4.186
41	23	somatosensory-abrupt	learning	naive	1.34
42	23	somatosensory-abrupt	learning	naive	-2.08
43	23	somatosensory-abrupt	learning	naive	-2.438
44	23	somatosensory-abrupt	learning	naive	7.718
45	23	somatosensory-abrupt	learning	naive	9.223
46	23	somatosensory-abrupt	learning	naive	3.611
47	23	somatosensory-abrupt	learning	naive	5.876
48	23	somatosensory-abrupt	learning	naive	0.833
49	23	somatosensory-abrupt	learning	naive	0.19
50	23	somatosensory-abrupt	learning	naive	1.439
51	23	somatosensory-abrupt	learning	naive	3.612
52	23	somatosensory-abrupt	learning	naive	2.493
53	23	somatosensory-abrupt	learning	naive	3.4
54	23	somatosensory-abrupt	learning	naive	-7.769
56	23	somatosensory-abrupt	learning	naive	3.202
57	23	somatosensory-abrupt	learning	naive	5.784
58	23	somatosensory-abrupt	learning	naive	-0.27
59	23	somatosensory-abrupt	learning	naive	-6.976
60	23	somatosensory-abrupt	learning	naive	6.122
61	23	somatosensory-abrupt	learning	naive	2.524
62	23	somatosensory-abrupt	learning	naive	2.954
63	23	somatosensory-abrupt	learning	naive	1.936
64	23	somatosensory-abrupt	learning	naive	3.048
65	23	somatosensory-abrupt	learning	naive	3.973
66	23	somatosensory-abrupt	learning	naive	-5.613
67	23	somatosensory-abrupt	learning	naive	9.133
68	23	somatosensory-abrupt	learning	naive	-4.275
69	23	somatosensory-abrupt	learning	naive	5.26
70	23	somatosensory-abrupt	learning	naive	-1.984
71	23	somatosensory-abrupt	learning	naive	-2.007
72	23	somatosensory-abrupt	learning	naive	-1.685
73	23	somatosensory-abrupt	learning	naive	1.502
74	23	somatosensory-abrupt	learning	naive	-1.126
75	23	somatosensory-abrupt	learning	naive	-1.455
76	23	somatosensory-abrupt	learning	naive	-2.682
77	23	somatosensory-abrupt	learning	naive	-1.603
78	23	somatosensory-abrupt	learning	naive	1.42
79	23	somatosensory-abrupt	learning	naive	-4.931
80	23	somatosensory-abrupt	learning	naive	-2.97
81	23	somatosensory-abrupt	learning	naive	3.024
82	23	somatosensory-abrupt	learning	naive	-1.713
83	23	somatosensory-abrupt	learning	naive	0.679
84	23	somatosensory-abrupt	learning	naive	2.939
86	23	somatosensory-abrupt	learning	naive	-1.198
87	23	somatosensory-abrupt	learning	naive	-7.779
88	23	somatosensory-abrupt	learning	naive	-4.078
89	23	somatosensory-abrupt	learning	naive	5.183
90	23	somatosensory-abrupt	learning	naive	-7.047
91	23	somatosensory-abrupt	learning	naive	-1.919
92	23	somatosensory-abrupt	learning	naive	-1.382
93	23	somatosensory-abrupt	learning	naive	4.131
94	23	somatosensory-abrupt	learning	naive	-6.653
95	23	somatosensory-abrupt	learning	naive	-0.208
96	23	somatosensory-abrupt	learning	naive	4.327
97	23	somatosensory-abrupt	learning	naive	9.07
98	23	somatosensory-abrupt	learning	naive	-3.373
99	23	somatosensory-abrupt	learning	naive	-0.944
100	23	somatosensory-abrupt	learning	naive	-9.67
101	23	somatosensory-abrupt	learning	naive	7.436
102	23	somatosensory-abrupt	learning	naive	3.788
103	23	somatosensory-abrupt	learning	naive	7.32
104	23	somatosensory-abrupt	learning	naive	4.656
105	23	somatosensory-abrupt	learning	naive	5.295
106	23	somatosensory-abrupt	learning	naive	-2.277
107	23	somatosensory-abrupt	learning	naive	18.057
108	23	somatosensory-abrupt	learning	naive	-2.672
109	23	somatosensory-abrupt	learning	naive	4.341
110	23	somatosensory-abrupt	learning	naive	-3.5
111	23	somatosensory-abrupt	learning	naive	-11.709
112	23	somatosensory-abrupt	learning	naive	-2.639
113	23	somatosensory-abrupt	learning	naive	2.688
114	23	somatosensory-abrupt	learning	naive	-3.372
116	23	somatosensory-abrupt	learning	naive	-6.631
117	23	somatosensory-abrupt	learning	naive	4.21
118	23	somatosensory-abrupt	learning	naive	3.781
119	23	somatosensory-abrupt	learning	naive	-6.82
120	23	somatosensory-abrupt	learning	naive	-5.48
121	23	somatosensory-abrupt	learning	naive	-0.644
122	23	somatosensory-abrupt	learning	naive	-7.764
123	23	somatosensory-abrupt	learning	naive	2.954
124	23	somatosensory-abrupt	learning	naive	-6.924
125	23	somatosensory-abrupt	learning	naive	-10.066
126	23	somatosensory-abrupt	learning	naive	-1.708
127	23	somatosensory-abrupt	learning	naive	-2.558
128	23	somatosensory-abrupt	learning	naive	7.148
129	23	somatosensory-abrupt	learning	naive	-7.505
130	23	somatosensory-abrupt	learning	naive	-0.041
131	23	somatosensory-abrupt	learning	naive	1.072
132	23	somatosensory-abrupt	learning	naive	-6.108
133	23	somatosensory-abrupt	learning	naive	-5.614
134	23	somatosensory-abrupt	learning	naive	2.728
135	23	somatosensory-abrupt	learning	naive	1.199
136	23	somatosensory-abrupt	learning	naive	-5.481
137	23	somatosensory-abrupt	learning	naive	3.973
138	23	somatosensory-abrupt	learning	naive	4.461
139	23	somatosensory-abrupt	learning	naive	-2.771
140	23	somatosensory-abrupt	learning	naive	8.675
141	23	somatosensory-abrupt	learning	naive	-2.829
142	23	somatosensory-abrupt	learning	naive	2.135
143	23	somatosensory-abrupt	learning	naive	-5.051
144	23	somatosensory-abrupt	learning	naive	-10.348
146	23	somatosensory-abrupt	learning	naive	8.764
147	23	somatosensory-abrupt	learning	naive	2.082
148	23	somatosensory-abrupt	learning	naive	-1.258
149	23	somatosensory-abrupt	learning	naive	-1.366
151	23	somatosensory-abrupt	learning	naive	0.185
152	23	somatosensory-abrupt	learning	naive	5.939
153	23	somatosensory-abrupt	learning	naive	-3.102
154	23	somatosensory-abrupt	learning	naive	7.129
155	23	somatosensory-abrupt	learning	naive	3.235
6	26	somatosensory-abrupt	learning	naive	3.327
7	26	somatosensory-abrupt	learning	naive	11.296
8	26	somatosensory-abrupt	learning	naive	10.372
9	26	somatosensory-abrupt	learning	naive	16.677
11	26	somatosensory-abrupt	learning	naive	12.479
12	26	somatosensory-abrupt	learning	naive	13.035
13	26	somatosensory-abrupt	learning	naive	6.056
14	26	somatosensory-abrupt	learning	naive	7.236
15	26	somatosensory-abrupt	learning	naive	-1.845
16	26	somatosensory-abrupt	learning	naive	8.498
17	26	somatosensory-abrupt	learning	naive	8.981
18	26	somatosensory-abrupt	learning	naive	15.908
19	26	somatosensory-abrupt	learning	naive	6.912
20	26	somatosensory-abrupt	learning	naive	9.47
21	26	somatosensory-abrupt	learning	naive	3.481
22	26	somatosensory-abrupt	learning	naive	0.473
23	26	somatosensory-abrupt	learning	naive	2.041
24	26	somatosensory-abrupt	learning	naive	2.031
25	26	somatosensory-abrupt	learning	naive	4.744
26	26	somatosensory-abrupt	learning	naive	6.801
27	26	somatosensory-abrupt	learning	naive	10.229
28	26	somatosensory-abrupt	learning	naive	5.782
29	26	somatosensory-abrupt	learning	naive	4.827
30	26	somatosensory-abrupt	learning	naive	8.053
31	26	somatosensory-abrupt	learning	naive	3.775
32	26	somatosensory-abrupt	learning	naive	-1.451
33	26	somatosensory-abrupt	learning	naive	4.076
34	26	somatosensory-abrupt	learning	naive	5.674
35	26	somatosensory-abrupt	learning	naive	4.248
36	26	somatosensory-abrupt	learning	naive	9.613
37	26	somatosensory-abrupt	learning	naive	4.913
38	26	somatosensory-abrupt	learning	naive	5.426
39	26	somatosensory-abrupt	learning	naive	-0.668
40	26	somatosensory-abrupt	learning	naive	5.666
41	26	somatosensory-abrupt	learning	naive	1.876
42	26	somatosensory-abrupt	learning	naive	3.517
43	26	somatosensory-abrupt	learning	naive	-2.511
44	26	somatosensory-abrupt	learning	naive	7.462
45	26	somatosensory-abrupt	learning	naive	2.12
46	26	somatosensory-abrupt	learning	naive	4.611
47	26	somatosensory-abrupt	learning	naive	7.876
48	26	somatosensory-abrupt	learning	naive	5.746
49	26	somatosensory-abrupt	learning	naive	2.342
50	26	somatosensory-abrupt	learning	naive	8.58
51	26	somatosensory-abrupt	learning	naive	8.062
52	26	somatosensory-abrupt	learning	naive	3.943
53	26	somatosensory-abrupt	learning	naive	2.585
54	26	somatosensory-abrupt	learning	naive	-1.651
56	26	somatosensory-abrupt	learning	naive	8.139
57	26	somatosensory-abrupt	learning	naive	2.72
58	26	somatosensory-abrupt	learning	naive	-6.82
59	26	somatosensory-abrupt	learning	naive	2.183
60	26	somatosensory-abrupt	learning	naive	6.824
61	26	somatosensory-abrupt	learning	naive	6.932
62	26	somatosensory-abrupt	learning	naive	0.844
63	26	somatosensory-abrupt	learning	naive	2.217
64	26	somatosensory-abrupt	learning	naive	0.243
65	26	somatosensory-abrupt	learning	naive	5.194
66	26	somatosensory-abrupt	learning	naive	1.87
67	26	somatosensory-abrupt	learning	naive	8.343
68	26	somatosensory-abrupt	learning	naive	2.098
69	26	somatosensory-abrupt	learning	naive	6.082
70	26	somatosensory-abrupt	learning	naive	0.869
71	26	somatosensory-abrupt	learning	naive	4.036
72	26	somatosensory-abrupt	learning	naive	6.54
73	26	somatosensory-abrupt	learning	naive	2.57
74	26	somatosensory-abrupt	learning	naive	15.619
75	26	somatosensory-abrupt	learning	naive	7.749
76	26	somatosensory-abrupt	learning	naive	0.812
77	26	somatosensory-abrupt	learning	naive	1.06
78	26	somatosensory-abrupt	learning	naive	5.182
79	26	somatosensory-abrupt	learning	naive	8.057
80	26	somatosensory-abrupt	learning	naive	-2.524
81	26	somatosensory-abrupt	learning	naive	7.076
82	26	somatosensory-abrupt	learning	naive	-1.749
83	26	somatosensory-abrupt	learning	naive	12.622
84	26	somatosensory-abrupt	learning	naive	8.048
86	26	somatosensory-abrupt	learning	naive	-2.794
87	26	somatosensory-abrupt	learning	naive	2.25
88	26	somatosensory-abrupt	learning	naive	2.925
89	26	somatosensory-abrupt	learning	naive	0.153
90	26	somatosensory-abrupt	learning	naive	-0.968
91	26	somatosensory-abrupt	learning	naive	2.549
92	26	somatosensory-abrupt	learning	naive	-2.315
93	26	somatosensory-abrupt	learning	naive	9.829
94	26	somatosensory-abrupt	learning	naive	-2.48
95	26	somatosensory-abrupt	learning	naive	6.517
96	26	somatosensory-abrupt	learning	naive	2.56
97	26	somatosensory-abrupt	learning	naive	16.385
98	26	somatosensory-abrupt	learning	naive	-2.314
99	26	somatosensory-abrupt	learning	naive	-8.556
100	26	somatosensory-abrupt	learning	naive	-1.393
101	26	somatosensory-abrupt	learning	naive	8.382
102	26	somatosensory-abrupt	learning	naive	-1.006
103	26	somatosensory-abrupt	learning	naive	2.246
104	26	somatosensory-abrupt	learning	naive	5.376
105	26	somatosensory-abrupt	learning	naive	2.753
106	26	somatosensory-abrupt	learning	naive	1.052
107	26	somatosensory-abrupt	learning	naive	3.404
108	26	somatosensory-abrupt	learning	naive	1.546
109	26	somatosensory-abrupt	learning	naive	-6.869
110	26	somatosensory-abrupt	learning	naive	-4.969
111	26	somatosensory-abrupt	learning	naive	3.206
112	26	somatosensory-abrupt	learning	naive	2.597
113	26	somatosensory-abrupt	learning	naive	-0.431
114	26	somatosensory-abrupt	learning	naive	4.307
116	26	somatosensory-abrupt	learning	naive	-9.777
117	26	somatosensory-abrupt	learning	naive	3.937
118	26	somatosensory-abrupt	learning	naive	1.838
119	26	somatosensory-abrupt	learning	naive	-5.785
120	26	somatosensory-abrupt	learning	naive	8.861
121	26	somatosensory-abrupt	learning	naive	7.204
122	26	somatosensory-abrupt	learning	naive	5.967
123	26	somatosensory-abrupt	learning	naive	2.278
124	26	somatosensory-abrupt	learning	naive	1.803
125	26	somatosensory-abrupt	learning	naive	1.121
126	26	somatosensory-abrupt	learning	naive	-7.378
127	26	somatosensory-abrupt	learning	naive	5.591
128	26	somatosensory-abrupt	learning	naive	-4.786
129	26	somatosensory-abrupt	learning	naive	13.313
130	26	somatosensory-abrupt	learning	naive	2.704
131	26	somatosensory-abrupt	learning	naive	5.064
132	26	somatosensory-abrupt	learning	naive	10.911
133	26	somatosensory-abrupt	learning	naive	17.02
134	26	somatosensory-abrupt	learning	naive	8.501
135	26	somatosensory-abrupt	learning	naive	7.685
136	26	somatosensory-abrupt	learning	naive	9.238
137	26	somatosensory-abrupt	learning	naive	12.272
138	26	somatosensory-abrupt	learning	naive	-8.986
139	26	somatosensory-abrupt	learning	naive	-0.793
140	26	somatosensory-abrupt	learning	naive	-2.903
141	26	somatosensory-abrupt	learning	naive	11.25
142	26	somatosensory-abrupt	learning	naive	-19.465
143	26	somatosensory-abrupt	learning	naive	1.799
144	26	somatosensory-abrupt	learning	naive	6.101
146	26	somatosensory-abrupt	learning	naive	4.16
147	26	somatosensory-abrupt	learning	naive	3.307
148	26	somatosensory-abrupt	learning	naive	0.948
149	26	somatosensory-abrupt	learning	naive	14.586
151	26	somatosensory-abrupt	learning	naive	12.18
152	26	somatosensory-abrupt	learning	naive	5.414
153	26	somatosensory-abrupt	learning	naive	8.152
154	26	somatosensory-abrupt	learning	naive	1.269
155	26	somatosensory-abrupt	learning	naive	-2.63
6	30	somatosensory-abrupt	learning	naive	25.162
7	30	somatosensory-abrupt	learning	naive	10.977
8	30	somatosensory-abrupt	learning	naive	12.331
9	30	somatosensory-abrupt	learning	naive	10.395
11	30	somatosensory-abrupt	learning	naive	8.527
12	30	somatosensory-abrupt	learning	naive	10.801
13	30	somatosensory-abrupt	learning	naive	5.488
14	30	somatosensory-abrupt	learning	naive	7.362
15	30	somatosensory-abrupt	learning	naive	5.992
16	30	somatosensory-abrupt	learning	naive	8.84
17	30	somatosensory-abrupt	learning	naive	1.142
18	30	somatosensory-abrupt	learning	naive	8.452
19	30	somatosensory-abrupt	learning	naive	9.677
20	30	somatosensory-abrupt	learning	naive	6.867
21	30	somatosensory-abrupt	learning	naive	3.096
22	30	somatosensory-abrupt	learning	naive	8.172
23	30	somatosensory-abrupt	learning	naive	5.325
24	30	somatosensory-abrupt	learning	naive	8.78
25	30	somatosensory-abrupt	learning	naive	4.357
26	30	somatosensory-abrupt	learning	naive	7.143
27	30	somatosensory-abrupt	learning	naive	0.188
28	30	somatosensory-abrupt	learning	naive	6.107
29	30	somatosensory-abrupt	learning	naive	8.104
30	30	somatosensory-abrupt	learning	naive	3.173
31	30	somatosensory-abrupt	learning	naive	5.898
32	30	somatosensory-abrupt	learning	naive	-0.273
33	30	somatosensory-abrupt	learning	naive	9.645
34	30	somatosensory-abrupt	learning	naive	-3.113
35	30	somatosensory-abrupt	learning	naive	7.936
36	30	somatosensory-abrupt	learning	naive	-3.455
37	30	somatosensory-abrupt	learning	naive	10.268
38	30	somatosensory-abrupt	learning	naive	5.92
39	30	somatosensory-abrupt	learning	naive	0.842
40	30	somatosensory-abrupt	learning	naive	-4.709
41	30	somatosensory-abrupt	learning	naive	3.765
42	30	somatosensory-abrupt	learning	naive	-3.986
43	30	somatosensory-abrupt	learning	naive	3.052
44	30	somatosensory-abrupt	learning	naive	0.759
45	30	somatosensory-abrupt	learning	naive	12.492
46	30	somatosensory-abrupt	learning	naive	-3.028
47	30	somatosensory-abrupt	learning	naive	4.284
48	30	somatosensory-abrupt	learning	naive	1.5
49	30	somatosensory-abrupt	learning	naive	3.81
50	30	somatosensory-abrupt	learning	naive	-1.518
51	30	somatosensory-abrupt	learning	naive	6.595
52	30	somatosensory-abrupt	learning	naive	-3.538
53	30	somatosensory-abrupt	learning	naive	-6.329
54	30	somatosensory-abrupt	learning	naive	6.892
56	30	somatosensory-abrupt	learning	naive	-7.28
57	30	somatosensory-abrupt	learning	naive	-4.664
58	30	somatosensory-abrupt	learning	naive	4.119
59	30	somatosensory-abrupt	learning	naive	1.648
60	30	somatosensory-abrupt	learning	naive	-3.304
61	30	somatosensory-abrupt	learning	naive	-3.518
62	30	somatosensory-abrupt	learning	naive	-2.162
63	30	somatosensory-abrupt	learning	naive	3.284
64	30	somatosensory-abrupt	learning	naive	-0.207
65	30	somatosensory-abrupt	learning	naive	-3.457
66	30	somatosensory-abrupt	learning	naive	-1.316
67	30	somatosensory-abrupt	learning	naive	-2.466
68	30	somatosensory-abrupt	learning	naive	2.426
69	30	somatosensory-abrupt	learning	naive	5.276
70	30	somatosensory-abrupt	learning	naive	-9.212
71	30	somatosensory-abrupt	learning	naive	-1.463
72	30	somatosensory-abrupt	learning	naive	3.819
73	30	somatosensory-abrupt	learning	naive	-5.348
74	30	somatosensory-abrupt	learning	naive	2.212
75	30	somatosensory-abrupt	learning	naive	3.068
76	30	somatosensory-abrupt	learning	naive	1.769
77	30	somatosensory-abrupt	learning	naive	-2.799
78	30	somatosensory-abrupt	learning	naive	2.774
79	30	somatosensory-abrupt	learning	naive	1.116
80	30	somatosensory-abrupt	learning	naive	-2.416
81	30	somatosensory-abrupt	learning	naive	-0.061
82	30	somatosensory-abrupt	learning	naive	-3.121
83	30	somatosensory-abrupt	learning	naive	3.432
84	30	somatosensory-abrupt	learning	naive	-1.401
86	30	somatosensory-abrupt	learning	naive	2.921
87	30	somatosensory-abrupt	learning	naive	-4.802
88	30	somatosensory-abrupt	learning	naive	1.228
89	30	somatosensory-abrupt	learning	naive	-8.658
90	30	somatosensory-abrupt	learning	naive	5.66
91	30	somatosensory-abrupt	learning	naive	-4.72
92	30	somatosensory-abrupt	learning	naive	-0.452
93	30	somatosensory-abrupt	learning	naive	-8.36
94	30	somatosensory-abrupt	learning	naive	-3.165
95	30	somatosensory-abrupt	learning	naive	7.214
96	30	somatosensory-abrupt	learning	naive	0.232
97	30	somatosensory-abrupt	learning	naive	1.387
98	30	somatosensory-abrupt	learning	naive	0.978
99	30	somatosensory-abrupt	learning	naive	4.731
100	30	somatosensory-abrupt	learning	naive	-0.912
101	30	somatosensory-abrupt	learning	naive	-0.721
102	30	somatosensory-abrupt	learning	naive	3.367
103	30	somatosensory-abrupt	learning	naive	6.682
104	30	somatosensory-abrupt	learning	naive	1.172
105	30	somatosensory-abrupt	learning	naive	-1.182
106	30	somatosensory-abrupt	learning	naive	0.558
107	30	somatosensory-abrupt	learning	naive	-2.632
108	30	somatosensory-abrupt	learning	naive	7.461
109	30	somatosensory-abrupt	learning	naive	2.121
110	30	somatosensory-abrupt	learning	naive	-4.771
111	30	somatosensory-abrupt	learning	naive	0.182
112	30	somatosensory-abrupt	learning	naive	-2.163
113	30	somatosensory-abrupt	learning	naive	0.209
114	30	somatosensory-abrupt	learning	naive	-9.628
116	30	somatosensory-abrupt	learning	naive	-0.675
117	30	somatosensory-abrupt	learning	naive	0.671
118	30	somatosensory-abrupt	learning	naive	0.164
119	30	somatosensory-abrupt	learning	naive	7.241
120	30	somatosensory-abrupt	learning	naive	-2.264
121	30	somatosensory-abrupt	learning	naive	7.163
122	30	somatosensory-abrupt	learning	naive	4.086
123	30	somatosensory-abrupt	learning	naive	2.818
124	30	somatosensory-abrupt	learning	naive	-1.18
125	30	somatosensory-abrupt	learning	naive	-1.753
126	30	somatosensory-abrupt	learning	naive	4.642
127	30	somatosensory-abrupt	learning	naive	5.868
128	30	somatosensory-abrupt	learning	naive	0.101
129	30	somatosensory-abrupt	learning	naive	6.077
130	30	somatosensory-abrupt	learning	naive	5.729
131	30	somatosensory-abrupt	learning	naive	-1.583
132	30	somatosensory-abrupt	learning	naive	-5.323
133	30	somatosensory-abrupt	learning	naive	-4.154
134	30	somatosensory-abrupt	learning	naive	-1.551
135	30	somatosensory-abrupt	learning	naive	4.053
136	30	somatosensory-abrupt	learning	naive	-5.183
137	30	somatosensory-abrupt	learning	naive	-5.621
138	30	somatosensory-abrupt	learning	naive	5.544
139	30	somatosensory-abrupt	learning	naive	0.837
140	30	somatosensory-abrupt	learning	naive	-2.399
141	30	somatosensory-abrupt	learning	naive	-0.274
142	30	somatosensory-abrupt	learning	naive	-2.047
143	30	somatosensory-abrupt	learning	naive	5.383
144	30	somatosensory-abrupt	learning	naive	1.359
146	30	somatosensory-abrupt	learning	naive	1.733
147	30	somatosensory-abrupt	learning	naive	-5.47
148	30	somatosensory-abrupt	learning	naive	-4.736
149	30	somatosensory-abrupt	learning	naive	-7.572
151	30	somatosensory-abrupt	learning	naive	-0.885
152	30	somatosensory-abrupt	learning	naive	-8.84
153	30	somatosensory-abrupt	learning	naive	-1.808
154	30	somatosensory-abrupt	learning	naive	-2.611
155	30	somatosensory-abrupt	learning	naive	-9.367
6	31	sham-abrupt	learning	naive	11.622
7	31	sham-abrupt	learning	naive	17.714
8	31	sham-abrupt	learning	naive	12.584
9	31	sham-abrupt	learning	naive	14.517
11	31	sham-abrupt	learning	naive	15.516
12	31	sham-abrupt	learning	naive	13.327
13	31	sham-abrupt	learning	naive	14.627
14	31	sham-abrupt	learning	naive	20.873
15	31	sham-abrupt	learning	naive	0.668
16	31	sham-abrupt	learning	naive	0.031
17	31	sham-abrupt	learning	naive	6.657
18	31	sham-abrupt	learning	naive	7.712
19	31	sham-abrupt	learning	naive	7.375
20	31	sham-abrupt	learning	naive	-5.587
21	31	sham-abrupt	learning	naive	3.668
22	31	sham-abrupt	learning	naive	1.744
23	31	sham-abrupt	learning	naive	0.729
24	31	sham-abrupt	learning	naive	-2.043
25	31	sham-abrupt	learning	naive	-0.095
26	31	sham-abrupt	learning	naive	0.572
27	31	sham-abrupt	learning	naive	0.61
28	31	sham-abrupt	learning	naive	6.46
29	31	sham-abrupt	learning	naive	4.02
30	31	sham-abrupt	learning	naive	-1.607
31	31	sham-abrupt	learning	naive	3.093
32	31	sham-abrupt	learning	naive	1.565
33	31	sham-abrupt	learning	naive	0.965
34	31	sham-abrupt	learning	naive	-2.163
35	31	sham-abrupt	learning	naive	1.08
36	31	sham-abrupt	learning	naive	2.723
37	31	sham-abrupt	learning	naive	1.244
38	31	sham-abrupt	learning	naive	6.428
39	31	sham-abrupt	learning	naive	-0.926
40	31	sham-abrupt	learning	naive	-0.065
41	31	sham-abrupt	learning	naive	7.495
42	31	sham-abrupt	learning	naive	1.166
43	31	sham-abrupt	learning	naive	2.214
44	31	sham-abrupt	learning	naive	-0.511
45	31	sham-abrupt	learning	naive	7.183
46	31	sham-abrupt	learning	naive	-4.649
47	31	sham-abrupt	learning	naive	7.264
48	31	sham-abrupt	learning	naive	4.313
49	31	sham-abrupt	learning	naive	2.12
50	31	sham-abrupt	learning	naive	-0.678
51	31	sham-abrupt	learning	naive	-2.459
52	31	sham-abrupt	learning	naive	0.744
53	31	sham-abrupt	learning	naive	4.651
54	31	sham-abrupt	learning	naive	5.44
56	31	sham-abrupt	learning	naive	7.1
57	31	sham-abrupt	learning	naive	-3.573
58	31	sham-abrupt	learning	naive	-8.025
59	31	sham-abrupt	learning	naive	0.075
60	31	sham-abrupt	learning	naive	2.564
61	31	sham-abrupt	learning	naive	-5.181
62	31	sham-abrupt	learning	naive	10.667
63	31	sham-abrupt	learning	naive	8.47
64	31	sham-abrupt	learning	naive	2.499
65	31	sham-abrupt	learning	naive	-1.858
66	31	sham-abrupt	learning	naive	1.821
67	31	sham-abrupt	learning	naive	2.969
68	31	sham-abrupt	learning	naive	4.017
69	31	sham-abrupt	learning	naive	-0.702
70	31	sham-abrupt	learning	naive	-0.694
71	31	sham-abrupt	learning	naive	6.097
72	31	sham-abrupt	learning	naive	2.702
73	31	sham-abrupt	learning	naive	2.051
74	31	sham-abrupt	learning	naive	-2.812
75	31	sham-abrupt	learning	naive	1.484
76	31	sham-abrupt	learning	naive	-3.557
77	31	sham-abrupt	learning	naive	0.326
78	31	sham-abrupt	learning	naive	-3.052
79	31	sham-abrupt	learning	naive	2.181
80	31	sham-abrupt	learning	naive	-6.306
81	31	sham-abrupt	learning	naive	4.638
82	31	sham-abrupt	learning	naive	-5.531
83	31	sham-abrupt	learning	naive	7.453
84	31	sham-abrupt	learning	naive	4.667
86	31	sham-abrupt	learning	naive	-3.811
87	31	sham-abrupt	learning	naive	2.741
88	31	sham-abrupt	learning	naive	0.507
89	31	sham-abrupt	learning	naive	-1.723
90	31	sham-abrupt	learning	naive	-0.666
91	31	sham-abrupt	learning	naive	-0.382
92	31	sham-abrupt	learning	naive	0.888
93	31	sham-abrupt	learning	naive	1.06
94	31	sham-abrupt	learning	naive	3.92
95	31	sham-abrupt	learning	naive	1.822
96	31	sham-abrupt	learning	naive	-1.551
97	31	sham-abrupt	learning	naive	-0.623
98	31	sham-abrupt	learning	naive	2.13
99	31	sham-abrupt	learning	naive	-2.979
100	31	sham-abrupt	learning	naive	5.864
101	31	sham-abrupt	learning	naive	-3.573
102	31	sham-abrupt	learning	naive	-5.375
103	31	sham-abrupt	learning	naive	6.522
104	31	sham-abrupt	learning	naive	3.219
105	31	sham-abrupt	learning	naive	6.09
106	31	sham-abrupt	learning	naive	-2.711
107	31	sham-abrupt	learning	naive	-0.045
108	31	sham-abrupt	learning	naive	-1.816
109	31	sham-abrupt	learning	naive	-11.459
110	31	sham-abrupt	learning	naive	-11.252
111	31	sham-abrupt	learning	naive	3.816
112	31	sham-abrupt	learning	naive	-8.353
113	31	sham-abrupt	learning	naive	-5.451
114	31	sham-abrupt	learning	naive	-12.284
116	31	sham-abrupt	learning	naive	-8.34
117	31	sham-abrupt	learning	naive	-1.184
118	31	sham-abrupt	learning	naive	-1.579
119	31	sham-abrupt	learning	naive	-7.904
120	31	sham-abrupt	learning	naive	2.821
121	31	sham-abrupt	learning	naive	-6.684
122	31	sham-abrupt	learning	naive	-3.854
123	31	sham-abrupt	learning	naive	3.69
124	31	sham-abrupt	learning	naive	-1.88
125	31	sham-abrupt	learning	naive	1.648
126	31	sham-abrupt	learning	naive	-3.668
127	31	sham-abrupt	learning	naive	-3.921
128	31	sham-abrupt	learning	naive	-3.815
129	31	sham-abrupt	learning	naive	5.227
130	31	sham-abrupt	learning	naive	1.055
131	31	sham-abrupt	learning	naive	1.534
132	31	sham-abrupt	learning	naive	-13.112
133	31	sham-abrupt	learning	naive	-8.909
134	31	sham-abrupt	learning	naive	0.151
135	31	sham-abrupt	learning	naive	-4.772
136	31	sham-abrupt	learning	naive	1.912
137	31	sham-abrupt	learning	naive	1.31
138	31	sham-abrupt	learning	naive	-0.209
139	31	sham-abrupt	learning	naive	11.144
140	31	sham-abrupt	learning	naive	2.072
141	31	sham-abrupt	learning	naive	3.74
142	31	sham-abrupt	learning	naive	4.348
143	31	sham-abrupt	learning	naive	0.787
144	31	sham-abrupt	learning	naive	-0.467
146	31	sham-abrupt	learning	naive	-4.777
147	31	sham-abrupt	learning	naive	-8.268
148	31	sham-abrupt	learning	naive	-4.396
149	31	sham-abrupt	learning	naive	7.832
151	31	sham-abrupt	learning	naive	3.328
152	31	sham-abrupt	learning	naive	-8.652
153	31	sham-abrupt	learning	naive	5.297
154	31	sham-abrupt	learning	naive	4.377
155	31	sham-abrupt	learning	naive	-2.875
6	32	somatosensory-abrupt	learning	naive	17.89
7	32	somatosensory-abrupt	learning	naive	8.527
8	32	somatosensory-abrupt	learning	naive	15.058
9	32	somatosensory-abrupt	learning	naive	17.786
11	32	somatosensory-abrupt	learning	naive	3.635
12	32	somatosensory-abrupt	learning	naive	8.531
13	32	somatosensory-abrupt	learning	naive	1.361
14	32	somatosensory-abrupt	learning	naive	-1.205
15	32	somatosensory-abrupt	learning	naive	3.927
16	32	somatosensory-abrupt	learning	naive	5.885
17	32	somatosensory-abrupt	learning	naive	5.628
18	32	somatosensory-abrupt	learning	naive	-0.034
19	32	somatosensory-abrupt	learning	naive	2.777
20	32	somatosensory-abrupt	learning	naive	-2.014
21	32	somatosensory-abrupt	learning	naive	4.925
22	32	somatosensory-abrupt	learning	naive	4.392
23	32	somatosensory-abrupt	learning	naive	6.908
24	32	somatosensory-abrupt	learning	naive	3.661
25	32	somatosensory-abrupt	learning	naive	-0.548
26	32	somatosensory-abrupt	learning	naive	-1.917
27	32	somatosensory-abrupt	learning	naive	-4.649
28	32	somatosensory-abrupt	learning	naive	0.869
29	32	somatosensory-abrupt	learning	naive	-5.461
30	32	somatosensory-abrupt	learning	naive	-0.997
31	32	somatosensory-abrupt	learning	naive	-2.717
32	32	somatosensory-abrupt	learning	naive	2.563
33	32	somatosensory-abrupt	learning	naive	0.743
34	32	somatosensory-abrupt	learning	naive	-0.299
35	32	somatosensory-abrupt	learning	naive	-1.338
36	32	somatosensory-abrupt	learning	naive	-2.491
37	32	somatosensory-abrupt	learning	naive	0.377
38	32	somatosensory-abrupt	learning	naive	-1.902
39	32	somatosensory-abrupt	learning	naive	-1.199
40	32	somatosensory-abrupt	learning	naive	3.042
41	32	somatosensory-abrupt	learning	naive	2.846
42	32	somatosensory-abrupt	learning	naive	1.033
43	32	somatosensory-abrupt	learning	naive	-2.583
44	32	somatosensory-abrupt	learning	naive	-0.29
45	32	somatosensory-abrupt	learning	naive	-2.124
46	32	somatosensory-abrupt	learning	naive	-7.278
47	32	somatosensory-abrupt	learning	naive	3.32
48	32	somatosensory-abrupt	learning	naive	-1.589
49	32	somatosensory-abrupt	learning	naive	14.254
50	32	somatosensory-abrupt	learning	naive	-2.951
51	32	somatosensory-abrupt	learning	naive	-4.322
52	32	somatosensory-abrupt	learning	naive	2.364
53	32	somatosensory-abrupt	learning	naive	1.855
54	32	somatosensory-abrupt	learning	naive	-4.317
56	32	somatosensory-abrupt	learning	naive	5.342
57	32	somatosensory-abrupt	learning	naive	-2.532
58	32	somatosensory-abrupt	learning	naive	5.026
59	32	somatosensory-abrupt	learning	naive	-0.883
60	32	somatosensory-abrupt	learning	naive	7.202
61	32	somatosensory-abrupt	learning	naive	-5.8
62	32	somatosensory-abrupt	learning	naive	2.986
63	32	somatosensory-abrupt	learning	naive	12.335
64	32	somatosensory-abrupt	learning	naive	4.235
65	32	somatosensory-abrupt	learning	naive	3.729
66	32	somatosensory-abrupt	learning	naive	7.563
67	32	somatosensory-abrupt	learning	naive	6.412
68	32	somatosensory-abrupt	learning	naive	14.53
69	32	somatosensory-abrupt	learning	naive	2.824
70	32	somatosensory-abrupt	learning	naive	4.139
71	32	somatosensory-abrupt	learning	naive	1.671
72	32	somatosensory-abrupt	learning	naive	-1.464
73	32	somatosensory-abrupt	learning	naive	1.48
74	32	somatosensory-abrupt	learning	naive	0.507
75	32	somatosensory-abrupt	learning	naive	5.668
76	32	somatosensory-abrupt	learning	naive	-0.969
77	32	somatosensory-abrupt	learning	naive	3.977
78	32	somatosensory-abrupt	learning	naive	6.071
79	32	somatosensory-abrupt	learning	naive	3.853
80	32	somatosensory-abrupt	learning	naive	2.667
81	32	somatosensory-abrupt	learning	naive	-11.603
82	32	somatosensory-abrupt	learning	naive	6.338
83	32	somatosensory-abrupt	learning	naive	2.436
84	32	somatosensory-abrupt	learning	naive	2.61
86	32	somatosensory-abrupt	learning	naive	-3.526
87	32	somatosensory-abrupt	learning	naive	-2.159
88	32	somatosensory-abrupt	learning	naive	-2.314
89	32	somatosensory-abrupt	learning	naive	-14.031
90	32	somatosensory-abrupt	learning	naive	-0.792
91	32	somatosensory-abrupt	learning	naive	-0.505
92	32	somatosensory-abrupt	learning	naive	4.98
93	32	somatosensory-abrupt	learning	naive	3.799
94	32	somatosensory-abrupt	learning	naive	-6.013
95	32	somatosensory-abrupt	learning	naive	-5.965
96	32	somatosensory-abrupt	learning	naive	0.678
97	32	somatosensory-abrupt	learning	naive	2.961
98	32	somatosensory-abrupt	learning	naive	-6.193
99	32	somatosensory-abrupt	learning	naive	3.262
100	32	somatosensory-abrupt	learning	naive	-2.752
101	32	somatosensory-abrupt	learning	naive	-3.3
102	32	somatosensory-abrupt	learning	naive	-7.138
103	32	somatosensory-abrupt	learning	naive	-4.989
104	32	somatosensory-abrupt	learning	naive	-6.034
105	32	somatosensory-abrupt	learning	naive	-1.043
106	32	somatosensory-abrupt	learning	naive	-9.096
107	32	somatosensory-abrupt	learning	naive	-1.299
108	32	somatosensory-abrupt	learning	naive	-5.574
109	32	somatosensory-abrupt	learning	naive	-1.77
110	32	somatosensory-abrupt	learning	naive	-0.69
111	32	somatosensory-abrupt	learning	naive	-6.735
112	32	somatosensory-abrupt	learning	naive	7.344
113	32	somatosensory-abrupt	learning	naive	0.509
114	32	somatosensory-abrupt	learning	naive	-5.122
116	32	somatosensory-abrupt	learning	naive	-8.066
117	32	somatosensory-abrupt	learning	naive	-6.488
118	32	somatosensory-abrupt	learning	naive	-12.481
119	32	somatosensory-abrupt	learning	naive	-1.094
120	32	somatosensory-abrupt	learning	naive	-8.805
121	32	somatosensory-abrupt	learning	naive	1.822
122	32	somatosensory-abrupt	learning	naive	-5.18
123	32	somatosensory-abrupt	learning	naive	0.157
124	32	somatosensory-abrupt	learning	naive	-0.205
125	32	somatosensory-abrupt	learning	naive	-2.414
126	32	somatosensory-abrupt	learning	naive	-3.027
127	32	somatosensory-abrupt	learning	naive	-5.598
128	32	somatosensory-abrupt	learning	naive	1.44
129	32	somatosensory-abrupt	learning	naive	-2.901
130	32	somatosensory-abrupt	learning	naive	3.653
131	32	somatosensory-abrupt	learning	naive	-5.093
132	32	somatosensory-abrupt	learning	naive	-0.763
133	32	somatosensory-abrupt	learning	naive	-3.316
134	32	somatosensory-abrupt	learning	naive	-4.667
135	32	somatosensory-abrupt	learning	naive	-2.411
136	32	somatosensory-abrupt	learning	naive	-5.831
[truncated: 3,761 more rows]

## Sheet: Fig_4D
subjnum	trialnum	adaptation	sessionName	groupName	learner
5	1	-0.00294878	learning	somatosensory-abrupt	naive
5	2	-0.0269737	learning	somatosensory-abrupt	naive
5	3	-0.0342636	learning	somatosensory-abrupt	naive
5	4	0.0112536	learning	somatosensory-abrupt	naive
5	5	0.00142278	learning	somatosensory-abrupt	naive
5	10	0.349665	learning	somatosensory-abrupt	naive
5	55	0.750662	learning	somatosensory-abrupt	naive
5	85	0.537641	learning	somatosensory-abrupt	naive
5	115	0.588619	learning	somatosensory-abrupt	naive
5	145	0.702332	learning	somatosensory-abrupt	naive
5	150	0.599584	learning	somatosensory-abrupt	naive
6	1	-1.17501	learning	sham-abrupt	naive
6	2	-0.0487018	learning	sham-abrupt	naive
6	3	0.0233026	learning	sham-abrupt	naive
6	4	-0.0191578	learning	sham-abrupt	naive
6	5	0.00483282	learning	sham-abrupt	naive
6	10	0.421336	learning	sham-abrupt	naive
6	55	0.137018	learning	sham-abrupt	naive
6	85	0.396379	learning	sham-abrupt	naive
6	115	0.820213	learning	sham-abrupt	naive
6	145	0.741839	learning	sham-abrupt	naive
6	150	0.692959	learning	sham-abrupt	naive
7	1	0.0670963	learning	somatosensory-abrupt	naive
7	2	0.028618	learning	somatosensory-abrupt	naive
7	3	-0.00370569	learning	somatosensory-abrupt	naive
7	4	0.00466086	learning	somatosensory-abrupt	naive
7	5	-0.00922236	learning	somatosensory-abrupt	naive
7	10	0.045643	learning	somatosensory-abrupt	naive
7	55	0.560285	learning	somatosensory-abrupt	naive
7	85	0.698316	learning	somatosensory-abrupt	naive
7	115	0.836675	learning	somatosensory-abrupt	naive
7	145	0.644818	learning	somatosensory-abrupt	naive
7	150	0.972941	learning	somatosensory-abrupt	naive
8	1	0.0281559	learning	somatosensory-abrupt	naive
8	2	-0.00900288	learning	somatosensory-abrupt	naive
8	3	-0.0129201	learning	somatosensory-abrupt	naive
8	4	0.00550644	learning	somatosensory-abrupt	naive
8	5	0.0529795	learning	somatosensory-abrupt	naive
8	10	0.0911668	learning	somatosensory-abrupt	naive
8	55	0.590755	learning	somatosensory-abrupt	naive
8	85	0.752348	learning	somatosensory-abrupt	naive
8	115	0.847236	learning	somatosensory-abrupt	naive
8	145	0.550134	learning	somatosensory-abrupt	naive
8	150	0.738509	learning	somatosensory-abrupt	naive
10	1	-0.0121844	learning	sham-abrupt	naive
10	2	-0.029989	learning	sham-abrupt	naive
10	3	0.00497287	learning	sham-abrupt	naive
10	4	0.0112569	learning	sham-abrupt	naive
10	5	0.0106974	learning	sham-abrupt	naive
10	10	0.104509	learning	sham-abrupt	naive
10	55	1.35716	learning	sham-abrupt	naive
10	85	0.656172	learning	sham-abrupt	naive
10	115	0.905805	learning	sham-abrupt	naive
10	145	0.945859	learning	sham-abrupt	naive
10	150	0.858675	learning	sham-abrupt	naive
11	1	0.0474128	learning	sham-abrupt	naive
11	2	-0.0187951	learning	sham-abrupt	naive
11	3	-0.0127392	learning	sham-abrupt	naive
11	4	-0.00325752	learning	sham-abrupt	naive
11	5	-0.0185873	learning	sham-abrupt	naive
11	10	0.0526581	learning	sham-abrupt	naive
11	55	0.260083	learning	sham-abrupt	naive
11	85	0.343316	learning	sham-abrupt	naive
11	115	0.560208	learning	sham-abrupt	naive
11	145	0.701903	learning	sham-abrupt	naive
11	150	0.535981	learning	sham-abrupt	naive
12	1	0.0289358	learning	somatosensory-abrupt	naive
12	2	0.0235249	learning	somatosensory-abrupt	naive
12	3	0.0499467	learning	somatosensory-abrupt	naive
12	4	0.0288496	learning	somatosensory-abrupt	naive
12	5	-0.0294025	learning	somatosensory-abrupt	naive
12	10	0.238336	learning	somatosensory-abrupt	naive
12	55	0.671595	learning	somatosensory-abrupt	naive
12	85	0.531011	learning	somatosensory-abrupt	naive
12	115	1.12532	learning	somatosensory-abrupt	naive
12	145	0.811254	learning	somatosensory-abrupt	naive
12	150	0.831241	learning	somatosensory-abrupt	naive
22	1	-0.0121718	learning	somatosensory-abrupt	naive
22	2	0.0699958	learning	somatosensory-abrupt	naive
22	3	0.00179642	learning	somatosensory-abrupt	naive
22	4	-0.0076348	learning	somatosensory-abrupt	naive
22	5	0.0135285	learning	somatosensory-abrupt	naive
22	10	0.0865011	learning	somatosensory-abrupt	naive
22	55	0.598122	learning	somatosensory-abrupt	naive
22	85	0.500827	learning	somatosensory-abrupt	naive
22	115	0.93529	learning	somatosensory-abrupt	naive
22	145	1.32953	learning	somatosensory-abrupt	naive
22	150	0.703913	learning	somatosensory-abrupt	naive
23	1	0.0247916	learning	somatosensory-abrupt	naive
23	2	0.0219152	learning	somatosensory-abrupt	naive
23	3	0.0049085	learning	somatosensory-abrupt	naive
23	4	0.00430686	learning	somatosensory-abrupt	naive
23	5	-0.0425462	learning	somatosensory-abrupt	naive
23	10	0.0570881	learning	somatosensory-abrupt	naive
23	55	0.588752	learning	somatosensory-abrupt	naive
23	85	0.878446	learning	somatosensory-abrupt	naive
23	115	0.69582	learning	somatosensory-abrupt	naive
23	145	0.388535	learning	somatosensory-abrupt	naive
23	150	0.740685	learning	somatosensory-abrupt	naive
25	1	0.173924	learning	somatosensory-abrupt	naive
25	2	0.014203	learning	somatosensory-abrupt	naive
25	3	0.0437929	learning	somatosensory-abrupt	naive
25	4	0.0157633	learning	somatosensory-abrupt	naive
25	5	-0.0201633	learning	somatosensory-abrupt	naive
25	10	0.169997	learning	somatosensory-abrupt	naive
25	55	0.134291	learning	somatosensory-abrupt	naive
25	85	0.314001	learning	somatosensory-abrupt	naive
25	115	0.396305	learning	somatosensory-abrupt	naive
25	145	0.344497	learning	somatosensory-abrupt	naive
25	150	0.741621	learning	somatosensory-abrupt	naive
26	1	0.240867	learning	somatosensory-abrupt	naive
26	2	0.000806583	learning	somatosensory-abrupt	naive
26	3	-0.0130894	learning	somatosensory-abrupt	naive
26	4	-0.0515916	learning	somatosensory-abrupt	naive
26	5	-0.0421715	learning	somatosensory-abrupt	naive
26	10	0.0137974	learning	somatosensory-abrupt	naive
26	55	0.243974	learning	somatosensory-abrupt	naive
26	85	0.673154	learning	somatosensory-abrupt	naive
26	115	0.27913	learning	somatosensory-abrupt	naive
26	145	0.609249	learning	somatosensory-abrupt	naive
26	150	0.228402	learning	somatosensory-abrupt	naive
30	1	0.0336281	learning	somatosensory-abrupt	naive
30	2	-0.0163386	learning	somatosensory-abrupt	naive
30	3	-0.0142205	learning	somatosensory-abrupt	naive
30	4	0.0165331	learning	somatosensory-abrupt	naive
30	5	0.0297835	learning	somatosensory-abrupt	naive
30	10	0.167906	learning	somatosensory-abrupt	naive
30	55	0.742572	learning	somatosensory-abrupt	naive
30	85	0.585467	learning	somatosensory-abrupt	naive
30	115	0.575835	learning	somatosensory-abrupt	naive
30	145	0.533497	learning	somatosensory-abrupt	naive
30	150	0.623996	learning	somatosensory-abrupt	naive
31	1	0.0693894	learning	sham-abrupt	naive
31	2	-0.016596	learning	sham-abrupt	naive
31	3	0.00666831	learning	sham-abrupt	naive
31	4	0.0224848	learning	sham-abrupt	naive
31	5	-0.00692292	learning	sham-abrupt	naive
31	10	-0.0140895	learning	sham-abrupt	naive
31	55	0.672203	learning	sham-abrupt	naive
31	85	0.814001	learning	sham-abrupt	naive
31	115	0.691839	learning	sham-abrupt	naive
31	145	0.8389	learning	sham-abrupt	naive
31	150	0.911297	learning	sham-abrupt	naive
32	1	0.03418	learning	somatosensory-abrupt	naive
32	2	0.0530858	learning	somatosensory-abrupt	naive
32	3	0.0240266	learning	somatosensory-abrupt	naive
32	4	0.022262	learning	somatosensory-abrupt	naive
32	5	-0.00170185	learning	somatosensory-abrupt	naive
32	10	0.304933	learning	somatosensory-abrupt	naive
32	55	0.661539	learning	somatosensory-abrupt	naive
32	85	0.784398	learning	somatosensory-abrupt	naive
32	115	1.04421	learning	somatosensory-abrupt	naive
32	145	0.908659	learning	somatosensory-abrupt	naive
32	150	0.972106	learning	somatosensory-abrupt	naive
34	1	0.0178702	learning	sham-abrupt	naive
34	2	-0.0119255	learning	sham-abrupt	naive
34	3	0.00692958	learning	sham-abrupt	naive
34	4	-0.0194741	learning	sham-abrupt	naive
34	5	-0.0054526	learning	sham-abrupt	naive
34	10	0.238852	learning	sham-abrupt	naive
34	55	0.53079	learning	sham-abrupt	naive
34	85	0.609806	learning	sham-abrupt	naive
34	115	0.698723	learning	sham-abrupt	naive
34	145	0.368122	learning	sham-abrupt	naive
34	150	0.653494	learning	sham-abrupt	naive
35	1	0.0857305	learning	sham-abrupt	naive
35	2	-0.0084843	learning	sham-abrupt	naive
35	3	-0.00422768	learning	sham-abrupt	naive
35	4	-0.0311916	learning	sham-abrupt	naive
35	5	0.00918317	learning	sham-abrupt	naive
35	10	0.0371872	learning	sham-abrupt	naive
35	55	0.420362	learning	sham-abrupt	naive
35	85	0.961178	learning	sham-abrupt	naive
35	115	0.985105	learning	sham-abrupt	naive
35	145	0.751295	learning	sham-abrupt	naive
35	150	0.633227	learning	sham-abrupt	naive
40	1	0.00500161	learning	sham-abrupt	naive
40	2	0.0110307	learning	sham-abrupt	naive
40	3	-0.0141516	learning	sham-abrupt	naive
40	4	0.00480301	learning	sham-abrupt	naive
40	5	0.0706533	learning	sham-abrupt	naive
40	10	0.0266687	learning	sham-abrupt	naive
40	55	0.751818	learning	sham-abrupt	naive
40	85	0.927119	learning	sham-abrupt	naive
40	115	0.686937	learning	sham-abrupt	naive
40	145	0.748227	learning	sham-abrupt	naive
40	150	0.781607	learning	sham-abrupt	naive
41	1	0.0453123	learning	sham-abrupt	naive
41	2	-0.000893422	learning	sham-abrupt	naive
41	3	-0.00687754	learning	sham-abrupt	naive
41	4	0.037155	learning	sham-abrupt	naive
41	5	-0.0100644	learning	sham-abrupt	naive
41	10	0.192623	learning	sham-abrupt	naive
41	55	0.635834	learning	sham-abrupt	naive
41	85	0.654775	learning	sham-abrupt	naive
41	115	0.857975	learning	sham-abrupt	naive
41	145	0.818477	learning	sham-abrupt	naive
41	150	0.745783	learning	sham-abrupt	naive
42	1	-0.0606348	learning	sham-abrupt	naive
42	2	-0.0261266	learning	sham-abrupt	naive
42	3	0.0233689	learning	sham-abrupt	naive
42	4	0.00290683	learning	sham-abrupt	naive
42	5	-0.0149232	learning	sham-abrupt	naive
42	10	0.100709	learning	sham-abrupt	naive
42	55	0.611876	learning	sham-abrupt	naive
42	85	0.612014	learning	sham-abrupt	naive
42	115	0.562659	learning	sham-abrupt	naive
42	145	0.819519	learning	sham-abrupt	naive
42	150	0.415136	learning	sham-abrupt	naive
43	1	0.0965621	learning	motor-abrupt	naive
43	2	0.00458626	learning	motor-abrupt	naive
43	3	0.0238587	learning	motor-abrupt	naive
43	4	-0.0454697	learning	motor-abrupt	naive
43	5	0.00187063	learning	motor-abrupt	naive
43	10	0.0550939	learning	motor-abrupt	naive
43	55	0.797815	learning	motor-abrupt	naive
43	85	0.671284	learning	motor-abrupt	naive
43	115	0.366047	learning	motor-abrupt	naive
43	145	0.512113	learning	motor-abrupt	naive
43	150	0.695255	learning	motor-abrupt	naive
44	1	0.19398	learning	motor-abrupt	naive
44	2	0.356709	learning	motor-abrupt	naive
44	3	0.0759156	learning	motor-abrupt	naive
44	4	0.0510192	learning	motor-abrupt	naive
44	5	0.0447083	learning	motor-abrupt	naive
44	10	0.0396701	learning	motor-abrupt	naive
44	55	0.233655	learning	motor-abrupt	naive
44	85	0.60065	learning	motor-abrupt	naive
44	115	0.893897	learning	motor-abrupt	naive
44	145	0.746437	learning	motor-abrupt	naive
44	150	0.475314	learning	motor-abrupt	naive
46	1	-0.048618	learning	motor-abrupt	naive
46	2	-0.0348169	learning	motor-abrupt	naive
46	3	-0.0257	learning	motor-abrupt	naive
46	4	0.00338361	learning	motor-abrupt	naive
46	5	-0.0400638	learning	motor-abrupt	naive
46	10	0.0278272	learning	motor-abrupt	naive
46	55	0.0313633	learning	motor-abrupt	naive
46	85	0.658509	learning	motor-abrupt	naive
46	115	0.426616	learning	motor-abrupt	naive
46	145	0.714826	learning	motor-abrupt	naive
46	150	0.587921	learning	motor-abrupt	naive
48	1	-0.0198758	learning	motor-abrupt	naive
48	2	0.000740501	learning	motor-abrupt	naive
48	3	-0.0309331	learning	motor-abrupt	naive
48	4	-0.0187012	learning	motor-abrupt	naive
48	5	0.00018051	learning	motor-abrupt	naive
48	10	0.0363411	learning	motor-abrupt	naive
48	55	0.387786	learning	motor-abrupt	naive
48	85	0.536763	learning	motor-abrupt	naive
48	115	0.771317	learning	motor-abrupt	naive
48	145	0.765519	learning	motor-abrupt	naive
48	150	0.796014	learning	motor-abrupt	naive
49	1	0.107866	learning	motor-abrupt	naive
49	2	0.0276208	learning	motor-abrupt	naive
49	3	0.00427198	learning	motor-abrupt	naive
49	4	-0.0190695	learning	motor-abrupt	naive
49	5	-0.0176733	learning	motor-abrupt	naive
49	10	0.551617	learning	motor-abrupt	naive
49	55	0.781616	learning	motor-abrupt	naive
49	85	1.29469	learning	motor-abrupt	naive
49	115	0.856189	learning	motor-abrupt	naive
49	145	0.735613	learning	motor-abrupt	naive
49	150	0.864565	learning	motor-abrupt	naive
51	1	-0.010171	learning	motor-abrupt	naive
51	2	0.0254597	learning	motor-abrupt	naive
51	3	0.0169488	learning	motor-abrupt	naive
51	4	0.019938	learning	motor-abrupt	naive
51	5	0.00242863	learning	motor-abrupt	naive
51	10	0.033654	learning	motor-abrupt	naive
51	55	0.525592	learning	motor-abrupt	naive
51	85	0.60384	learning	motor-abrupt	naive
51	115	0.752236	learning	motor-abrupt	naive
51	145	0.843787	learning	motor-abrupt	naive
51	150	0.881104	learning	motor-abrupt	naive
52	1	0.0680461	learning	motor-abrupt	naive
52	2	0.0331011	learning	motor-abrupt	naive
52	3	0.00198009	learning	motor-abrupt	naive
52	4	0.0356128	learning	motor-abrupt	naive
52	5	0.00305863	learning	motor-abrupt	naive
52	10	0.124466	learning	motor-abrupt	naive
52	55	0.710008	learning	motor-abrupt	naive
52	85	0.68831	learning	motor-abrupt	naive
52	115	0.750629	learning	motor-abrupt	naive
52	145	0.798732	learning	motor-abrupt	naive
52	150	1.08953	learning	motor-abrupt	naive
57	1	0.121739	learning	motor-abrupt	naive
57	2	0.0373119	learning	motor-abrupt	naive
57	3	0.00396738	learning	motor-abrupt	naive
57	4	0.0179203	learning	motor-abrupt	naive
57	5	0.0808368	learning	motor-abrupt	naive
57	10	0.0874463	learning	motor-abrupt	naive
57	55	0.608875	learning	motor-abrupt	naive
57	85	0.47341	learning	motor-abrupt	naive
57	115	0.66108	learning	motor-abrupt	naive
57	145	0.63603	learning	motor-abrupt	naive
57	150	0.59016	learning	motor-abrupt	naive
59	1	0.103931	learning	motor-abrupt	naive
59	2	0.0291068	learning	motor-abrupt	naive
59	3	0.0265776	learning	motor-abrupt	naive
59	4	0.00810808	learning	motor-abrupt	naive
59	5	0.0264754	learning	motor-abrupt	naive
59	10	0.164008	learning	motor-abrupt	naive
59	55	0.562567	learning	motor-abrupt	naive
59	85	0.551589	learning	motor-abrupt	naive
59	115	0.386346	learning	motor-abrupt	naive
59	145	0.706391	learning	motor-abrupt	naive
59	150	0.395583	learning	motor-abrupt	naive
62	1	0.0812272	learning	motor-abrupt	naive
62	2	0.00491097	learning	motor-abrupt	naive
62	3	0.0659043	learning	motor-abrupt	naive
62	4	-0.0383771	learning	motor-abrupt	naive
62	5	0.000208009	learning	motor-abrupt	naive
62	10	0.0267626	learning	motor-abrupt	naive
62	55	0.290769	learning	motor-abrupt	naive
62	85	0.645513	learning	motor-abrupt	naive
62	115	0.453579	learning	motor-abrupt	naive
62	145	0.539274	learning	motor-abrupt	naive
62	150	0.544576	learning	motor-abrupt	naive
64	1	0.0178255	learning	sham-abrupt	naive
64	2	0.0209965	learning	sham-abrupt	naive
64	3	0.0510265	learning	sham-abrupt	naive
64	4	0.0286438	learning	sham-abrupt	naive
64	5	-0.0189266	learning	sham-abrupt	naive
64	10	0.314413	learning	sham-abrupt	naive
64	55	0.542269	learning	sham-abrupt	naive
64	85	1.11759	learning	sham-abrupt	naive
64	115	0.881718	learning	sham-abrupt	naive
64	145	0.809612	learning	sham-abrupt	naive
64	150	0.918138	learning	sham-abrupt	naive
82	10	0.172187	relearning	somatosensory-gradual	experienced
82	55	0.75656	relearning	somatosensory-gradual	experienced
82	85	0.683616	relearning	somatosensory-gradual	experienced
82	115	0.540902	relearning	somatosensory-gradual	experienced
82	145	0.851996	relearning	somatosensory-gradual	experienced
82	150	0.780699	relearning	somatosensory-gradual	experienced
83	10	0.343119	relearning	somatosensory-gradual	experienced
83	55	0.738049	relearning	somatosensory-gradual	experienced
83	85	0.589049	relearning	somatosensory-gradual	experienced
83	115	0.624611	relearning	somatosensory-gradual	experienced
83	145	0.872417	relearning	somatosensory-gradual	experienced
83	150	0.59678	relearning	somatosensory-gradual	experienced
85	10	0.252693	relearning	somatosensory-gradual	experienced
85	55	0.498317	relearning	somatosensory-gradual	experienced
85	85	0.52618	relearning	somatosensory-gradual	experienced
85	115	0.857029	relearning	somatosensory-gradual	experienced
85	145	0.689588	relearning	somatosensory-gradual	experienced
85	150	1.01246	relearning	somatosensory-gradual	experienced
88	10	0.462745	relearning	somatosensory-gradual	experienced
88	55	0.545019	relearning	somatosensory-gradual	experienced
88	85	0.641869	relearning	somatosensory-gradual	experienced
88	115	0.632691	relearning	somatosensory-gradual	experienced
88	145	0.707367	relearning	somatosensory-gradual	experienced
88	150	0.728593	relearning	somatosensory-gradual	experienced
91	10	0.0650644	relearning	somatosensory-gradual	experienced
91	55	0.485462	relearning	somatosensory-gradual	experienced
91	85	0.581756	relearning	somatosensory-gradual	experienced
91	115	0.693023	relearning	somatosensory-gradual	experienced
91	145	0.721588	relearning	somatosensory-gradual	experienced
91	150	0.647835	relearning	somatosensory-gradual	experienced
92	10	0.0116444	relearning	somatosensory-gradual	experienced
92	55	0.600956	relearning	somatosensory-gradual	experienced
92	85	0.766125	relearning	somatosensory-gradual	experienced
92	115	0.826877	relearning	somatosensory-gradual	experienced
92	145	0.922237	relearning	somatosensory-gradual	experienced
92	150	0.818245	relearning	somatosensory-gradual	experienced
93	10	0.47876	relearning	somatosensory-gradual	experienced
93	55	1.06798	relearning	somatosensory-gradual	experienced
93	85	0.862976	relearning	somatosensory-gradual	experienced
93	115	1.1414	relearning	somatosensory-gradual	experienced
93	145	1.03264	relearning	somatosensory-gradual	experienced
93	150	0.666915	relearning	somatosensory-gradual	experienced
95	10	0.567709	relearning	somatosensory-gradual	experienced
95	55	0.508875	relearning	somatosensory-gradual	experienced
95	85	0.738448	relearning	somatosensory-gradual	experienced
95	115	0.731614	relearning	somatosensory-gradual	experienced
95	145	0.661887	relearning	somatosensory-gradual	experienced
95	150	0.77272	relearning	somatosensory-gradual	experienced
99	10	0.115614	relearning	somatosensory-gradual	experienced
99	55	0.287199	relearning	somatosensory-gradual	experienced
99	85	0.885227	relearning	somatosensory-gradual	experienced
99	115	0.720613	relearning	somatosensory-gradual	experienced
99	145	0.847293	relearning	somatosensory-gradual	experienced
99	150	0.797068	relearning	somatosensory-gradual	experienced
101	10	0.432079	relearning	somatosensory-gradual	experienced
101	55	0.693763	relearning	somatosensory-gradual	experienced
101	85	0.789159	relearning	somatosensory-gradual	experienced
101	115	0.760212	relearning	somatosensory-gradual	experienced
101	145	0.824199	relearning	somatosensory-gradual	experienced
101	150	1.01703	relearning	somatosensory-gradual	experienced
